# Supplementary material for: Catalytic ortho C–H methylation and trideuteromethylation of arylthianthrenium salts via the Catellani strategy
Source: Royal Society of Chemistry journal article supplement (doi:10.1039/d4qo00506f), 2024-01-01

# Supporting Information

## Catalytic *Ortho* C-H Methylation and Trideuteromethylation of Arylthianthrenium Salts via the Catellani Strategy

Chen Chen,<sup>a\*</sup> Xiao-Xu Zhang,<sup>a</sup> Zi-Yi Wang,<sup>a</sup> Chunjie Ni,<sup>b\*</sup> and Bolin Zhu<sup>a\*</sup>

<sup>a</sup>Tianjin Key Laboratory of Structure and Performance for Functional Molecules, College of Chemistry, Tianjin Normal University, Tianjin 300387, P. R. China.

<sup>b</sup>School of Pharmacy, Yancheng Teachers University, Yancheng 224007, P. R. China.

### Table of Contents

|                                                                |            |
|----------------------------------------------------------------|------------|
| <b>General Information</b> -----                               | <b>S02</b> |
| <b>General Procedure for the Synthesis of Substrates</b> ----- | <b>S02</b> |
| <b>Experimental Procedure</b> -----                            | <b>S05</b> |
| <b>Control Experiments</b> -----                               |            |
| <b>S07</b>                                                     |            |
| <b>Characterization of Products</b> -----                      | <b>S10</b> |
| <b>References</b> -----                                        | <b>S40</b> |
| <b>X-ray Data</b> -----                                        | <b>S41</b> |
| <b>NMR Spectra</b> -----                                       | <b>S47</b> |

## General Information:

The  $^1\text{H}$  NMR,  $^{13}\text{C}$  NMR,  $^{19}\text{F}$  NMR and  $^{31}\text{P}$  NMR were recorded with Bruker 400 MHz spectrometer instruments in  $\text{CDCl}_3$ . The chemical shifts ( $\delta$ ) of  $^1\text{H}$  NMR,  $^{13}\text{C}$  NMR,  $^{19}\text{F}$  NMR and  $^{31}\text{P}$  NMR were measured in ppm, referenced to residual  $^1\text{H}$  and  $^{13}\text{C}$  signals of nondeuterated  $\text{CDCl}_3$  ( $\delta = 7.26$  and  $77.00$ ) as internal standards. All solvents were obtained from commercial sources and were purified according to standard procedures. Purification of products was accomplished by flash chromatography using silica gel (200~300 mesh). Thin layer chromatography (TLC) was performed on Merck silica gel GF254 plates and visualized by UV-light (254 nm). Melting points were obtained on a Yanaco-241 apparatus and are uncorrected. HRMS were recorded on Agilent 6520 Q-TOF mass spectrometer with ESI resource.

## General Procedure for the Synthesis of Substrates:

### 1. General Procedure for the Synthesis of Aryl Thianthrenes

(1)

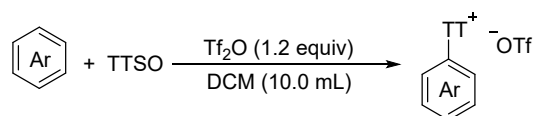

A 50 mL two-necked flask was charged with thianthrene S-oxide (TTSO, 5.0 mmol, 1.0 equiv), DCM (10.0 mL) and arenes (5.0 mmol, 1.0 equiv) under a nitrogen atmosphere. The reaction mixture was then cooled to  $-40$  °C and stirred at this temperature.  $\text{Tf}_2\text{O}$  (6.0 mmol, 1.2 equiv) was added dropwise. The reaction mixture was stirred at  $-40$  °C for 1 h, and then allowed to stir at room temperature for 12 h, neutralized by a saturated  $\text{NaHCO}_3$  solution, and extracted with DCM. The combined organic layers were dried over anhydrous  $\text{Na}_2\text{SO}_4$  and concentrated to dryness under reduced pressure. The crude product was purified by crystallization from DCM/MTBE system as a white solid.

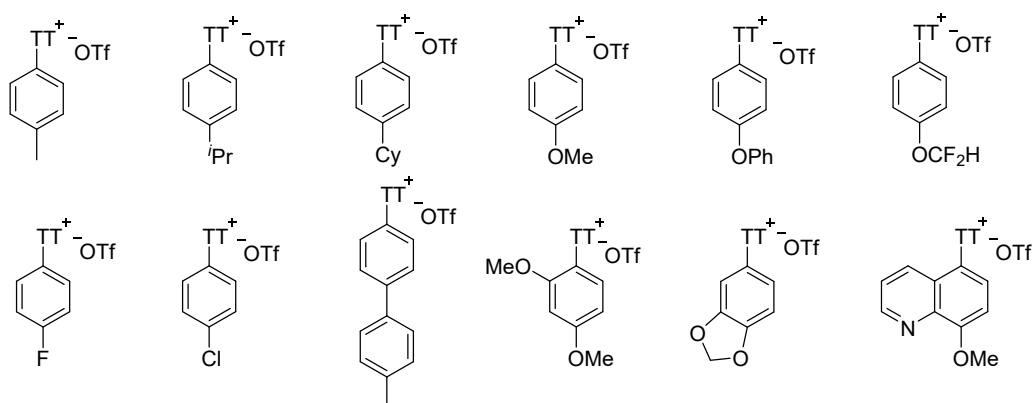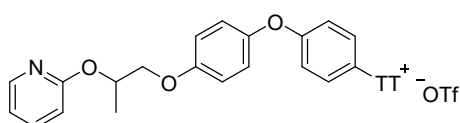

(2)

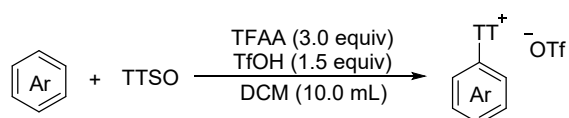

A 50 mL two-necked flask was charged with thianthrene S-oxide (TTSO, 5.0 mmol, 1.0 equiv), DCM (10.0 mL) and arenes (5.0 mmol, 1.0 equiv) under a nitrogen atmosphere. The reaction mixture was then cooled to  $-40\text{ }^{\circ}\text{C}$  and stirred at this temperature, trifluoroacetic anhydride (TFAA, 15.0 mmol, 3.0 equiv) and trifluoromethanesulfonic acid (TfOH, 7.5 mmol, 1.5 equiv) were added dropwise. The reaction mixture was stirred at  $40\text{ }^{\circ}\text{C}$  for 1 h, and then allowed to stir at room temperature for 12 h, neutralized by a saturated aqueous  $\text{NaHCO}_3$  solution, and extracted with DCM. Drying of organic phase with anhydrous  $\text{Na}_2\text{SO}_4$ , and concentrated to dryness under reduced pressure. The crude product was purified by crystallization from DCM/MTBE system as a white solid.

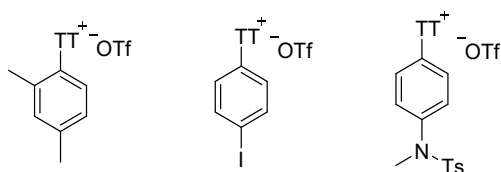

(3)

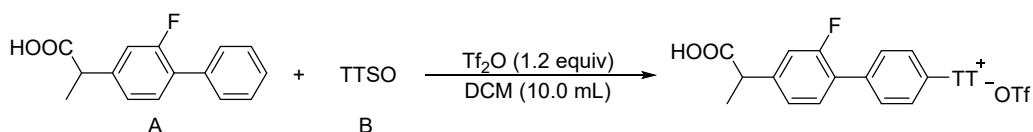

A 50 mL two-necked flask was charged with thianthrene S-oxide (TTSO, 5.0 mmol, 1.0 equiv), DCM (10.0 mL) and Flurbiprofen (5.0 mmol, 1.0 equiv) under a nitrogen atmosphere. The reaction mixture was then cooled to -40 °C and stirred at this temperature. Tf<sub>2</sub>O (6.0 mmol, 1.2 equiv) was added dropwise. The reaction mixture was stirred at -40 °C for 1 h, and then allowed to stir at room temperature for 12 h, extracted with DCM. The combined organic layers were dried over anhydrous Na<sub>2</sub>SO<sub>4</sub> and concentrated to dryness under reduced pressure. The crude product was purified by crystallization from DCM/MTBE system as a white solid.

(4)

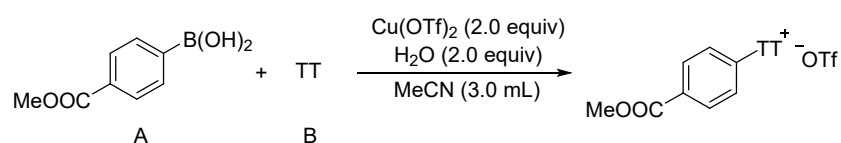

In a 38 mL sealed tube, the mixture of (4-(methoxycarbonyl)phenyl)boronic acid (3.0 mmol, 1.0 equiv), thianthrene (TT, 4.5 mmol, 1.5 equiv), Cu(OTf)<sub>2</sub> (6.0 mmol, 2.0 equiv), H<sub>2</sub>O (6.0 mmol, 2.0 equiv) were added in 3.0 mL MeCN. Then, the tube was purged with N<sub>2</sub> for three times and sealed with PTEF cap. The reaction mixture was heated to 100 °C for 3 h. After cooling to room temperature, the reaction mixture was added into ammonia solution (50 mL, 25%–28% solution in water), and the water phase was extracted with DCM (3 x 30 mL). The combined organic layers were dried over anhydrous Na<sub>2</sub>SO<sub>4</sub> and concentrated to dryness under reduced pressure. The crude product was purified by crystallization from DCM/Et<sub>2</sub>O system as a white solid.

## 2. General Procedure for the Synthesis of Activated Olefins

(1)

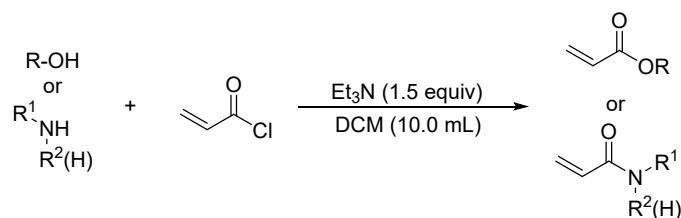

In a 50 mL round bottom flask, acryloyl chloride (6.0 mmol, 1.2 equiv) was added dropwise to a solution of corresponding alcohols and amines (5.0 mmol, 1.0 equiv) and Et<sub>3</sub>N (7.5 mmol, 1.5 equiv) in DCM (10.0 mL) at 0 °C. After the addition was

complete, the ice bath was removed, and the reaction mixture was stirred at room temperature. The progress of the reaction was monitored by TLC. Upon completion of the reaction, the reaction mixture was diluted with water and extracted with DCM. The combined organic layer was washed with saturated aqueous NaHCO<sub>3</sub>. The organic extract was dried over anhydrous Na<sub>2</sub>SO<sub>4</sub>, filtered, and concentrated under reduced pressure. The crude mixture was purified by silica gel flash column chromatography using EtOAc and PE as the eluent to afford the activated olefins.

(2)

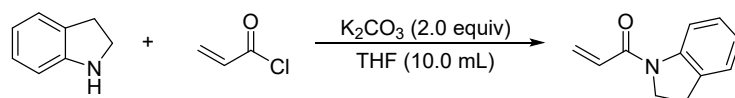

Indoline (5.0 mmol, 1.0 equiv) was dissolved in THF (10.0 mL) in a 50 mL two-necked flask, K<sub>2</sub>CO<sub>3</sub> (10.0 mmol, 2.0 equiv) was added and the mixture was cooled to 0 °C under a nitrogen atmosphere. Acryloyl chloride (5.5 mmol, 1.1 equiv) was added dropwise via syringe with rapid stirring. The formation of a white precipitate was immediately observed. After the addition was complete, the mixture was stirred vigorously for 20 min, then poured into a large beaker of water (100.0 mL) cooled in an ice-water bath. The aqueous mixture was stirred slowly for 1 h under an open atmosphere and solid NaCl (approximately 2.0 g) was added to enhance precipitation. When a large amount of white precipitate was visible, the solid was collected by filtration, air dried for 2 h and dried under vacuum overnight to give 1-(indolin-1-yl)prop-2-en-1-one as an off-white solid.

### Experimental Procedure:

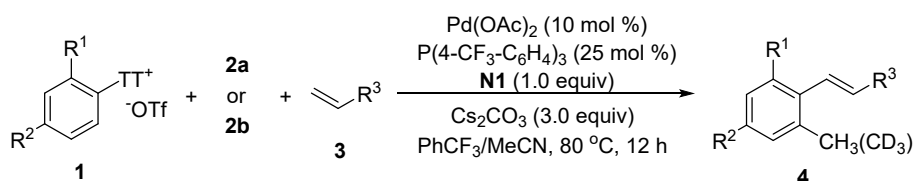

**General procedure A:** In a 38 mL sealed tube, the mixture of **1** (0.2 mmol, 1.0 equiv), **2** (0.4 mmol, 2.0 equiv), **3** (0.4 mmol, 2.0 equiv), Pd(OAc)<sub>2</sub> (10 mol%), P(4-CF<sub>3</sub>-C<sub>6</sub>H<sub>4</sub>)<sub>3</sub> (25 mol%), **N1** (0.2 mmol, 1.0 equiv), Cs<sub>2</sub>CO<sub>3</sub> (0.6 mmol, 3.0 equiv) were added in 2.0 mL PhCF<sub>3</sub>/MeCN (1:1). Then, the tube was purged with N<sub>2</sub> for

three times and sealed with PTEF cap. The reaction mixture was heated to 80 °C for 12 h. When the reaction was finished, the mixture was cooled to room temperature and the solvents were removed under reduced pressure. The residue was purified by silica gel column chromatography to give the products **4a-4e**, **4g-4i**, **4o**, **4q-4r**, **4a-d<sub>3</sub>-4c-d<sub>3</sub>**.

The same procedure as General procedure A except changing the amount of **3** to 0.2 mmol (1.0 equiv) give the products **4f**, **4j-4n**, **4p**, **4s**, **4s-d<sub>3</sub>**, **4af-4al**, **4an-d<sub>3</sub>**, **4am-d<sub>3</sub>**.

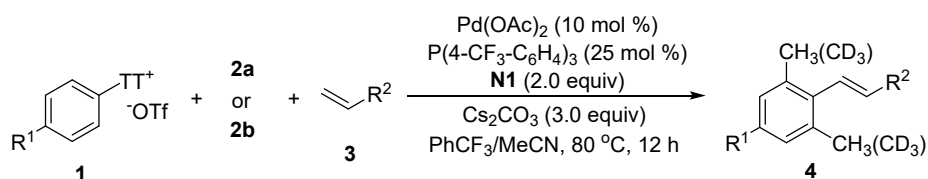

**General procedure B:** In a 38 mL sealed tube, the mixture of **1** (0.2 mmol, 1.0 equiv), **2** (0.8 mmol, 4.0 equiv), **3** (0.4 mmol, 2.0 equiv), Pd(OAc)<sub>2</sub> (10 mol%), P(4-CF<sub>3</sub>-C<sub>6</sub>H<sub>4</sub>)<sub>3</sub> (25 mol%), **N1** (0.4 mmol, 2.0 equiv), Cs<sub>2</sub>CO<sub>3</sub> (0.6 mmol, 3.0 equiv) were added in 2.0 mL PhCF<sub>3</sub>/MeCN (1:1). Then, the tube was purged with N<sub>2</sub> for three times and sealed with PTEF cap. The reaction mixture was heated to 80 °C for 12 h. When the reaction was finished, the mixture was cooled to room temperature and the solvents were removed under reduced pressure. The residue was purified by silica gel column chromatography to give the products **4a**, **4t-4z**, **4aa-4ae**, **4m**, **4n**, **4a-d<sub>6</sub>**, **4t-d<sub>6</sub>**, **4ac-d<sub>6</sub>**, **4u-d<sub>6</sub>**, **4w-d<sub>6</sub>**, **4aa-d<sub>6</sub>**, **4ad-d<sub>6</sub>**, **4ae-d<sub>6</sub>**, **4al**, **4ao**, **4ap**, **4as**.

The same procedure as General procedure B except changing the amount of **3** to 0.2 mmol (1.0 equiv) give the products **4m**, **4n**, **4ag-d<sub>6</sub>**, **4aq**, **4ar-d<sub>6</sub>**.

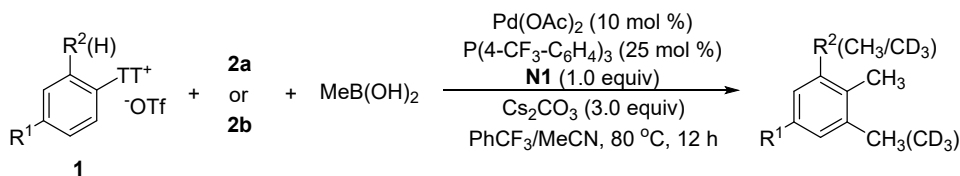

**General procedure C:** In a 38 mL sealed tube, the mixture of **1** (0.2 mmol, 1.0 equiv), **2** (0.4 mmol, 2.0 equiv), MeB(OH)<sub>2</sub> (0.4 mmol, 2.0 equiv), Pd(OAc)<sub>2</sub> (10 mol%), P(4-CF<sub>3</sub>-C<sub>6</sub>H<sub>4</sub>)<sub>3</sub> (25 mol%), **N1** (0.2 mmol, 1.0 equiv), Cs<sub>2</sub>CO<sub>3</sub> (0.6 mmol, 3.0 equiv) were added in 2.0 mL PhCF<sub>3</sub>/MeCN (1:1). Then, the tube was purged with N<sub>2</sub> for three times and sealed with PTEF cap. The reaction mixture was heated to 80 °C

for 12 h. When the reaction was finished, the mixture was cooled to room temperature and the solvents were removed under reduced pressure. The residue was purified by silica gel column chromatography to give the product **5**.

The same procedure as General procedure C except changing the amount of **2** to 0.8 mmol (4.0 equiv) and **N1** to 0.4 equiv (2.0 equiv) give the products **6**, **4at**, **4at-d<sub>9</sub>**.

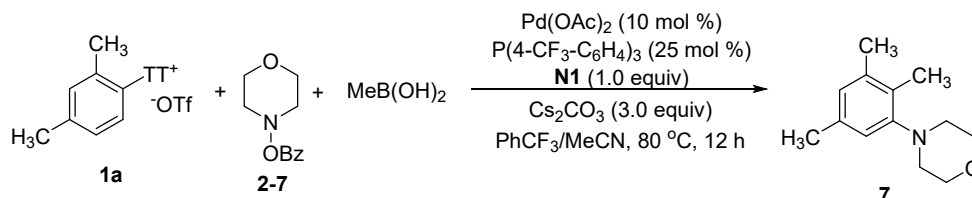

**General procedure D:** In a 38 mL sealed tube, the mixture of **1a** (0.2 mmol, 1.0 equiv), **2-7** (0.3 mmol, 1.5 equiv), MeB(OH)<sub>2</sub> (0.4 mmol, 2.0 equiv), Pd(OAc)<sub>2</sub> (10 mol%), P(4-CF<sub>3</sub>-C<sub>6</sub>H<sub>4</sub>)<sub>3</sub> (25 mol%), **N1** (0.2 mmol, 1.0 equiv), Cs<sub>2</sub>CO<sub>3</sub> (0.6 mmol, 3.0 equiv) were added in 2.0 mL PhCF<sub>3</sub>/MeCN (1:1). Then, the tube was purged with N<sub>2</sub> for three times and sealed with PTEF cap. The reaction mixture was heated to 80 °C for 12 h. When the reaction was finished, the mixture was cooled to room temperature and the solvents were removed under reduced pressure. The residue was purified by silica gel column chromatography to give the product **7**.

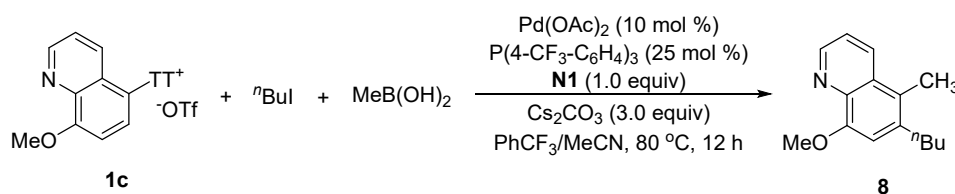

**General procedure E:** In a 38 mL sealed tube, the mixture of **1a** (0.2 mmol, 1.0 equiv), *n*-BuI (0.4 mmol, 2.0 equiv), MeB(OH)<sub>2</sub> (0.4 mmol, 2.0 equiv), Pd(OAc)<sub>2</sub> (10 mol%), P(4-CF<sub>3</sub>-C<sub>6</sub>H<sub>4</sub>)<sub>3</sub> (25 mol%), **N1** (0.2 mmol, 1.0 equiv), Cs<sub>2</sub>CO<sub>3</sub> (0.6 mmol, 3.0 equiv) were added in 2.0 mL PhCF<sub>3</sub>/MeCN (1:1). Then, the tube was purged with N<sub>2</sub> for three times and sealed with PTEF cap. The reaction mixture was heated to 80 °C for 12 h. When the reaction was finished, the mixture was cooled to room temperature and the solvents were removed under reduced pressure. The residue was purified by silica gel column chromatography to give the product **8**.

### Control Experiments:

## 1. One-pot C-H methylation:

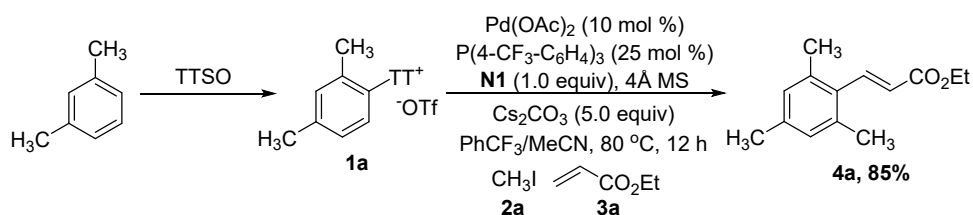

A 25 mL two-necked flask was charged with thianthrene S-oxide (TTSO, 0.2 mmol, 1.0 equiv), DCM (1.0 mL) and 1,3-dimethylbenzene (0.2 mmol, 1.0 equiv) under a nitrogen atmosphere. The reaction mixture was then cooled to -40 °C and stirred at this temperature, trifluoroacetic anhydride (TFAA, 0.6 mmol, 3.0 equiv) and trifluoromethanesulfonic acid (TfOH, 0.3 mmol, 1.5 equiv) were added dropwise. The reaction mixture was stirred at 40 °C for 0.5 h, and then allowed to stir at room temperature for 12 h. The mixture was concentrated to dryness under reduced pressure to give the crude product of **1a**.

In a 38 mL sealed tube, the mixture of the crude product of **1a**, **2a** (0.4 mmol, 2.0 equiv), **3a** (0.4 mmol, 2.0 equiv), Pd(OAc)<sub>2</sub> (10 mol%), P(4-CF<sub>3</sub>-C<sub>6</sub>H<sub>4</sub>)<sub>3</sub> (25 mol%), **N1** (0.2 mmol, 1.0 equiv), Cs<sub>2</sub>CO<sub>3</sub> (1.0 mmol, 5.0 equiv) were added in 2.0 mL PhCF<sub>3</sub>/MeCN (1:1). Then, the tube was purged with N<sub>2</sub> for three times and sealed with PTEF cap. The reaction mixture was heated to 80 °C for 12 h. When the reaction was finished, the mixture was cooled to room temperature and the solvents were removed under reduced pressure. The residue was purified by silica gel column chromatography to give product **4a** in 85% yield.

## 2. Competition experiments:

(1)

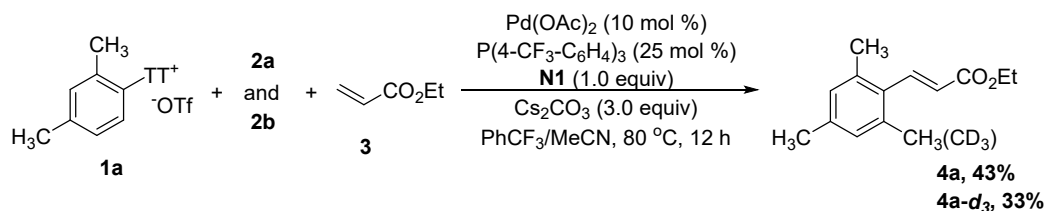

In a 38 mL sealed tube, the mixture of **1a** (0.2 mmol, 1.0 equiv), **2a** (0.4 mmol, 2.0 equiv), **2b** (0.4 mmol, 2.0 equiv), ethyl acrylate (0.4 mmol, 0.2 equiv), Pd(OAc)<sub>2</sub>



(10 mol%), P(4-CF<sub>3</sub>-C<sub>6</sub>H<sub>4</sub>)<sub>3</sub> (25 mol%), **N1** (0.2 mmol, 1.0 equiv), Cs<sub>2</sub>CO<sub>3</sub> (0.6 mmol, 3.0 equiv) were added in 2.0 mL PhCF<sub>3</sub>/MeCN (1:1). Then, the tube was purged with N<sub>2</sub> for three times and sealed with PTEF cap. The reaction mixture was heated to 80 °C for 12 h. When the reaction was finished, the mixture was cooled to room temperature and the solvents were removed under reduced pressure. The residue was purified by silica gel column chromatography to give a mixture of **4a** and **4a-d<sub>3</sub>**. <sup>1</sup>H NMR was carried out by adding 1,3,5-trimethoxybenzene (0.2 mmol, 1.0 equiv) as an internal standard in a mixture of **4a** and **4a-d<sub>3</sub>**. (the <sup>1</sup>H NMR spectrum of the crude product is shown below).

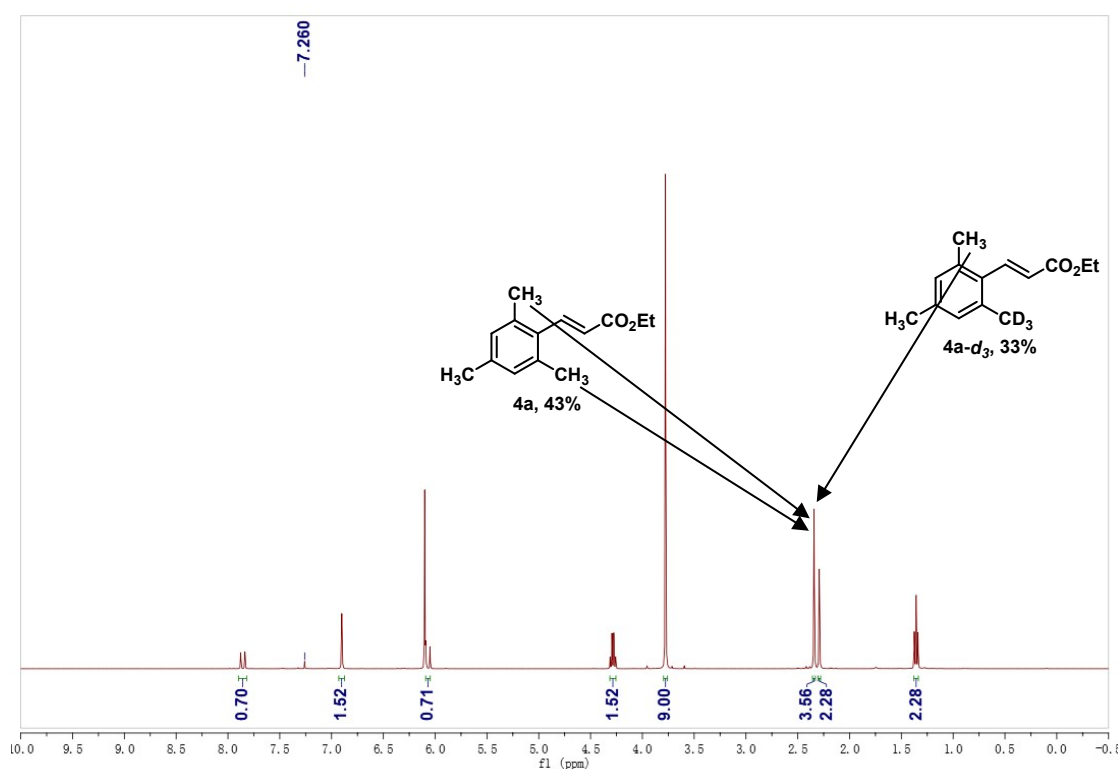

(2)

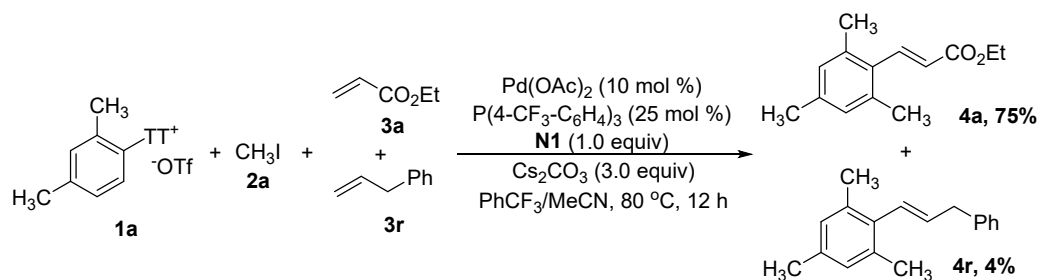

In a 38 mL sealed tube, the mixture of **1a** (0.2 mmol, 1.0 equiv), **2a** (0.4 mmol, 2.0 equiv), **3a** (0.4 mmol, 0.2 equiv), **3r** (0.4 mmol, 0.2 equiv), Pd(OAc)<sub>2</sub> (10 mol%),

P(4-CF<sub>3</sub>-C<sub>6</sub>H<sub>4</sub>)<sub>3</sub> (25 mol%), **N1** (1.0 equiv), Cs<sub>2</sub>CO<sub>3</sub> (0.6 mmol, 3.0 equiv) were added in 2.0 mL PhCF<sub>3</sub>/MeCN (1:1). Then, the tube was purged with N<sub>2</sub> for three times and sealed with PTEF cap. The reaction mixture was heated to 80 °C for 12 h. When the reaction was finished, the mixture was cooled to room temperature and the solvents were removed under reduced pressure. The residue was purified by silica gel column chromatography to give a mixture of **4a** and **4r**. <sup>1</sup>H NMR was carried out by adding 1,3,5-trimethoxybenzene (0.2 mmol, 1.0 equiv) as an internal standard in a mixture of **4a** and **4r**. (the <sup>1</sup>H NMR spectrum of the crude product is shown below).

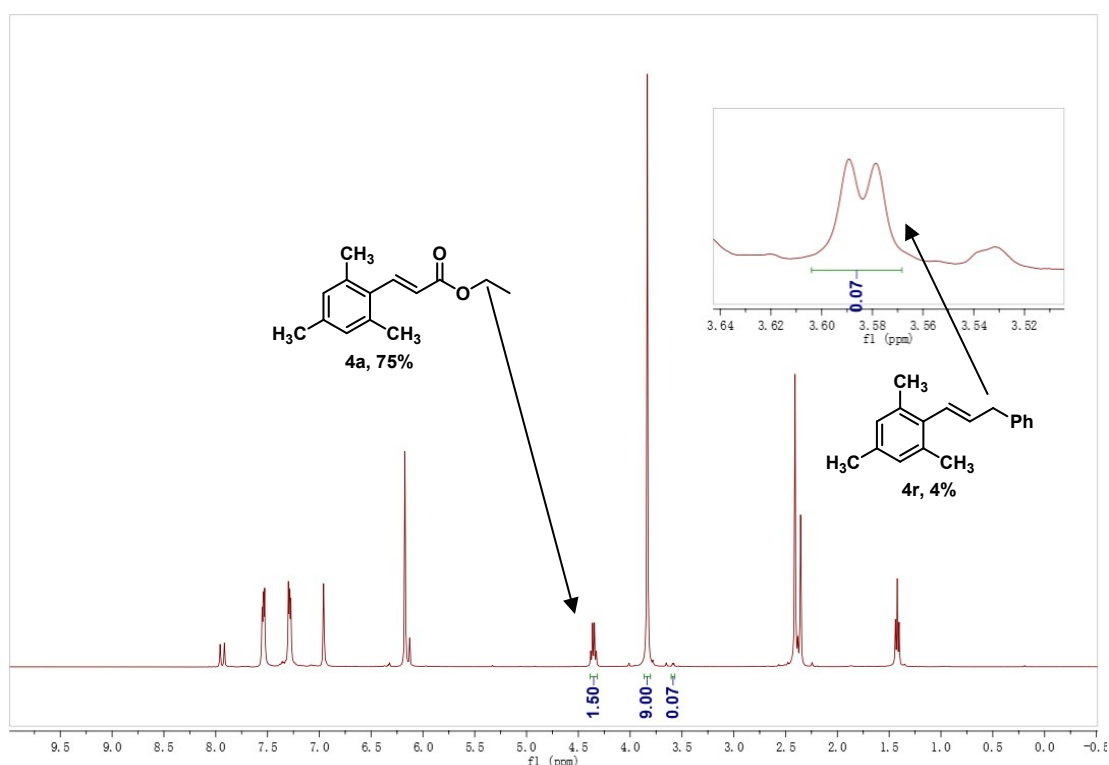

## Characterization of Products:

### (*E*)-3-(2,4,6-trimethylphenyl) ethyl acrylate(**4a**)<sup>[1]</sup>

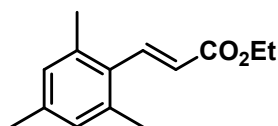

**4a**

Yield: 96%, 41.9 mg; appearance: white solid, M.P.: 35-36 °C.

<sup>1</sup>H NMR (400 MHz, CDCl<sub>3</sub>) δ 7.84 (d, *J* = 16.4 Hz, 1H), 6.90 (s, 2H), 6.06 (d, *J* = 16.4 Hz, 1H), 4.28 (q, *J* = 7.2 Hz, 2H), 2.33 (s, 6H), 2.29 (s, 3H), 1.35 (t, *J* = 6.8

Hz, 3H).

$^{13}\text{C}$  NMR (100 MHz,  $\text{CDCl}_3$ )  $\delta$  166.91, 143.07, 138.15, 136.71, 130.85, 129.05, 123.08, 60.35, 20.99, 20.93, 14.24.

**(E)-3-(2,4-dimethoxy-6-methylphenyl) ethyl acrylate(4b)<sup>[2]</sup>**

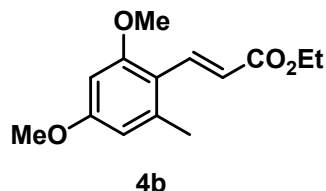

Yield: 71%, 35.5 mg; appearance: white solid, M.P.: 68-70 °C.

$^1\text{H}$  NMR (400 MHz,  $\text{CDCl}_3$ )  $\delta$  7.88 (d,  $J = 16.0$  Hz, 1H), 6.61 (d,  $J = 16.0$  Hz, 1H), 6.36 – 6.32 (m, 2H), 4.24 (q,  $J = 6.8$  Hz, 2H), 3.84 (s, 3H), 3.80 (s, 3H), 2.43 (s, 3H), 1.32 (t,  $J = 7.2$  Hz, 3H).

$^{13}\text{C}$  NMR (100 MHz,  $\text{CDCl}_3$ )  $\delta$  168.51, 161.09, 160.93, 141.42, 138.25, 119.06, 115.18, 107.50, 96.17, 60.01, 55.29, 55.16, 21.45, 14.31.

**(E)-3-(8-methoxy-6-methylquinolin-5-yl) ethyl acrylate(4c)**

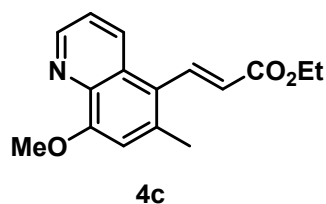

Yield: 75%, 40.7 mg; appearance: yellow solid, M.P.: 108-109 °C.

$^1\text{H}$  NMR (400 MHz,  $\text{CDCl}_3$ )  $\delta$  8.84 – 8.82 (m, 1H), 8.36 – 8.33 (m, 1H), 8.03 (d,  $J = 16.0$  Hz, 1H), 7.40 – 7.36 (m, 1H), 6.85 (s, 1H), 6.11 (d,  $J = 16.0$  Hz, 1H), 4.27 (q,  $J = 7.2$  Hz, 2H), 4.04 (s, 3H), 2.49 (s, 3H), 1.32 (t,  $J = 7.2$  Hz, 3H).

$^{13}\text{C}$  NMR (100 MHz,  $\text{CDCl}_3$ )  $\delta$  166.54, 155.10, 148.28, 140.78, 138.94, 136.15, 132.82, 127.55, 124.67, 122.48, 121.90, 110.60, 60.58, 55.93, 21.46, 14.24.

ESI-MS: Calcd for  $\text{C}_{16}\text{H}_{17}\text{NO}_3$ :  $[\text{M}+\text{H}^+]$  272.1281, found 272.1284.

**(E)-3-(2,4,6-trimethylphenyl) cyclohexyl acrylate(4d)**

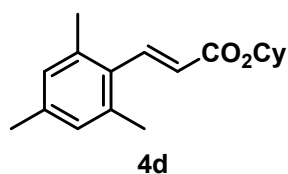

Yield: 83%, 45.2 mg; appearance: white solid, M.P.: 72-73 °C.

**<sup>1</sup>H NMR (400 MHz, CDCl<sub>3</sub>)** δ 7.83 (d, *J* = 16.4 Hz, 1H), 6.89 (s, 2H), 6.05 (d, *J* = 16.4 Hz, 1H), 4.94 – 4.87 (m, 1H), 2.34 (s, 6H), 2.29 (s, 3H), 1.97 – 1.92 (m, 2H), 1.81 – 1.75 (m, 2H), 1.64 – 1.36 (m, 6H).

**<sup>13</sup>C NMR (100 MHz, CDCl<sub>3</sub>)** δ 166.45, 142.79, 138.13, 136.78, 130.99, 129.09, 123.67, 72.68, 31.73, 25.43, 23.80, 21.07, 20.99.

**ESI-MS:** Calcd for C<sub>18</sub>H<sub>24</sub>O<sub>2</sub>: [M+H<sup>+</sup>] 273.1849, found 273.1848.

**(*E*)-3-(2,4,6-trimethylphenyl) *tert* butyl acrylate(4e)**<sup>[3]</sup>

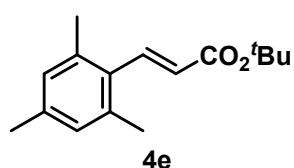

Yield: 85%, 41.9 mg; appearance: colorless oil.

**<sup>1</sup>H NMR (400 MHz, CDCl<sub>3</sub>)** δ 7.75 (d, *J* = 16.4 Hz, 1H), 6.89 (s, 2H), 5.98 (d, *J* = 16.0 Hz, 1H), 2.33 (s, 6H), 2.28 (s, 3H), 1.55 (s, 9H).

**<sup>13</sup>C NMR (100 MHz, CDCl<sub>3</sub>)** δ 166.40, 142.00, 138.01, 136.79, 131.04, 129.05, 124.82, 80.41, 28.21, 21.13, 21.01.

**(*E*)-3-(2,4,6-trimethylphenyl) phenyl acrylate(4f)**<sup>[4]</sup>

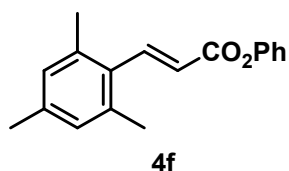

Yield: 94%, 50.1 mg; appearance: white solid, M.P.: 60-62 °C.

**<sup>1</sup>H NMR (400 MHz, CDCl<sub>3</sub>)** δ 7.96 (d, *J* = 16.4 Hz, 1H), 7.35 – 7.29 (m, 2H), 7.18 – 7.08 (m, 3H), 6.83 (s, 2H), 6.19 (d, *J* = 16.4 Hz, 1H), 2.30 (s, 6H), 2.21 (s, 3H).

**<sup>13</sup>C NMR (100 MHz, CDCl<sub>3</sub>)** δ 165.34, 150.83, 145.11, 138.73, 137.06, 130.53, 129.35, 129.29, 125.68, 122.02, 121.61, 21.16, 21.03.

**(*E*)-3-(2,4,6-trimethylphenyl) Benzyl acrylate(4g)**

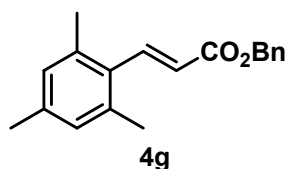

Yield: 66%, 37.0 mg; appearance: colorless oil.

**<sup>1</sup>H NMR (400 MHz, CDCl<sub>3</sub>)** δ 7.82 (d, *J* = 16.4 Hz, 1H), 7.35 – 7.22 (m, 5H), 6.79 (s, 2H), 6.02 (d, *J* = 16.4 Hz, 1H), 5.17 (s, 2H), 2.24 (s, 6H), 2.18 (s, 3H).

**<sup>13</sup>C NMR (100 MHz, CDCl<sub>3</sub>)** δ 166.18, 143.75, 138.38, 136.87, 136.05, 130.75, 129.16, 128.55, 128.26, 128.20, 122.64, 66.29, 21.10, 21.01.

**ESI-MS:** Calcd for C<sub>19</sub>H<sub>20</sub>O<sub>2</sub>: [M+H<sup>+</sup>] 281.1536, found 281.1537.

**(Z)-2-fluoro-3-(2,4,6-trimethylphenyl) methyl acrylate(4h)**

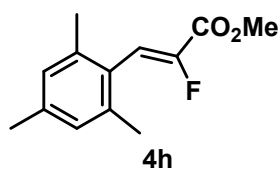

Yield: 60%, 26.7 mg; appearance: yellow oil.

**<sup>1</sup>H NMR (400 MHz, CDCl<sub>3</sub>)** δ 7.06 (d, *J* = 35.6 Hz, 1H), 6.91 (s, 2H), 3.91 (s, 3H), 2.29 (s, 3H), 2.24 (s, 6H).

**<sup>13</sup>C NMR (100 MHz, CDCl<sub>3</sub>)** δ 161.46 (d, *J* = 35.0 Hz), 146.38 (d, *J* = 262.0 Hz), 138.33, 136.59, 128.35, 126.30, 116.98 (d, *J* = 11.0 Hz), 52.64, 21.02, 20.33 (d, *J* = 3.0 Hz).

**<sup>19</sup>F NMR (376 MHz, CDCl<sub>3</sub>)** δ -121.82 (s).

**ESI-MS:** Calcd for C<sub>13</sub>H<sub>15</sub>FO<sub>2</sub>: [M+H<sup>+</sup>] 223.1129, found 223.1128.

**(E)-3-(2,4,6-trimethylbenzylidene) dihydrofuran-2(3H)-one/3-(2,4,6-trimethylbenzyl) furan-2(5H)-one(4i)**

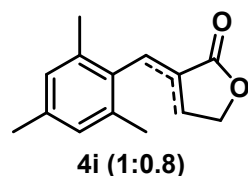

Yield: 53%, 22.9 mg; appearance: white solid, M.P.: 98-99 °C.

**<sup>1</sup>H NMR (400 MHz, CDCl<sub>3</sub>)** δ 7.65 (s, 1H), 6.90 (s, 2H), 6.88 (s, 1.6H), 6.61 (s,

0.8H), 4.73 (s, 1.6H), 4.38 (t,  $J = 7.2$  Hz, 2H), 3.55 (s, 1.6H), 2.68 (td,  $J = 7.2, 2.4$  Hz, 2H), 2.29 (s, 3H), 2.28 (s, 2.4H), 2.20 (s, 4.8H), 2.18 (s, 6H).

$^{13}\text{C}$  NMR (100 MHz,  $\text{CDCl}_3$ )  $\delta$  174.07, 171.21, 144.73, 137.86, 137.19, 136.32, 136.19, 135.29, 133.04, 131.15, 131.04, 128.98, 128.36, 127.80, 70.33, 65.52, 26.52, 25.56, 20.96, 20.81, 20.00, 19.75.

ESI-MS: Calcd for  $\text{C}_{14}\text{H}_{16}\text{O}_2$ :  $[\text{M}+\text{H}^+]$  217.1223, found 217.1224.

**(*E*)-*N,N*-diethyl-3-(2,4,6-trimethylphenyl) acrylamide(4j)**

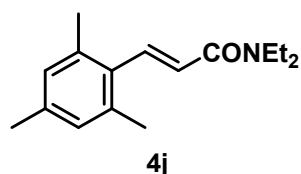

Yield: 92%, 45.1 mg; appearance: colorless oil.

$^1\text{H}$  NMR (400 MHz,  $\text{CDCl}_3$ )  $\delta$  7.79 (d,  $J = 16.0$  Hz, 1H), 6.90 (s, 2H), 6.42 (d,  $J = 16.0$  Hz, 1H), 3.49 – 3.42 (m, 4H), 2.33 (s, 6H), 2.28 (s, 3H), 1.21 (t,  $J = 7.2$  Hz, 6H).

$^{13}\text{C}$  NMR (100 MHz,  $\text{CDCl}_3$ )  $\delta$  165.61, 140.71, 137.53, 136.41, 132.41, 128.88, 123.13, 42.18, 41.09, 21.04, 20.97, 15.06, 13.28.

ESI-MS: Calcd for  $\text{C}_{16}\text{H}_{23}\text{NO}$ :  $[\text{M}+\text{H}^+]$  246.1852, found 246.1852.

**(*E*)-1-(indolin-1-yl)-3-mesitylprop-2-en-1-one(4k)**

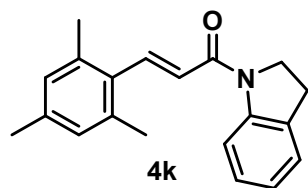

Yield: 84%, 49.0 mg; appearance: yellow solid, M.P.: 152-154 °C.

$^1\text{H}$  NMR (400 MHz,  $\text{CDCl}_3$ )  $\delta$  8.44 (d,  $J = 6.4$  Hz, 1H), 8.02 (d,  $J = 16.0$  Hz, 1H), 7.30 – 7.23 (m, 2H), 7.09 (t,  $J = 7.6$  Hz, 1H), 6.98 (s, 2H), 6.53 (d,  $J = 15.6$  Hz, 1H), 4.22 (t,  $J = 8.0$  Hz, 2H), 3.25 (s, 2H), 2.44 (s, 6H), 2.36 (s, 3H).

$^{13}\text{C}$  NMR (100 MHz,  $\text{CDCl}_3$ )  $\delta$  164.16, 142.94, 141.51, 137.85, 136.52, 131.68, 129.00, 127.40, 124.39, 124.07, 123.69, 117.31, 47.88, 27.82, 21.04, 20.90.

ESI-MS: Calcd for  $\text{C}_{20}\text{H}_{21}\text{NO}$ :  $[\text{M}+\text{H}^+]$  292.1696, found 292.1695.

**(*E*)-*N*-((3*s*,5*s*,7*s*)-adamantan-1-yl)-3-mesitylacrylamide(4l)**

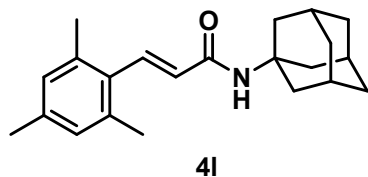

Yield: 71%, 45.9 mg; appearance: white solid, M.P.: 219-220 °C.

**<sup>1</sup>H NMR (400 MHz, CDCl<sub>3</sub>)** δ 7.68 (d, *J* = 16.4 Hz, 1H), 6.86 (s, 2H), 5.94 (d, *J* = 16.0 Hz, 1H), 5.45 (s, 1H), 2.30 (s, 6H), 2.27 (s, 3H), 2.10 (s, 9H), 1.71 (s, 6H).

**<sup>13</sup>C NMR (100 MHz, CDCl<sub>3</sub>)** δ 164.90, 138.53, 137.40, 136.52, 131.53, 128.85, 126.78, 52.12, 41.65, 36.32, 29.40, 21.04, 22.09.

**ESI-MS:** Calcd for C<sub>22</sub>H<sub>29</sub>NO: [M+H<sup>+</sup>] 324.2322, found 324.2318.

**(*E*)-3-mesityl-*N*-phenylacrylamide(4m)**

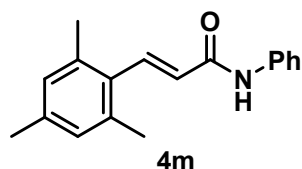

Yield: 77%, 40.9 mg; appearance: white solid, M.P.: 187-188 °C.

**<sup>1</sup>H NMR (400 MHz, DMSO-*d*<sub>6</sub>)** δ 10.17 (s, 1H), 7.72 – 7.66 (m, 3H), 7.34 (t, *J* = 8.0 Hz, 2H), 7.07 (t, *J* = 7.6 Hz, 1H), 6.92 (s, 2H), 6.44 (d, *J* = 16.0 Hz, 1H), 2.31 (s, 6H), 2.23 (s, 3H).

**<sup>13</sup>C NMR (100 MHz, DMSO-*d*<sub>6</sub>)** δ 163.62, 139.32, 138.06, 137.35, 136.32, 130.96, 129.11, 128.86, 126.67, 123.39, 119.20, 20.95, 20.67.

**ESI-MS:** Calcd for C<sub>18</sub>H<sub>19</sub>NO: [M+H<sup>+</sup>] 266.1539, found 266.1540.

**(*E*)-1,3,5-trimethyl-2-(2-(phenylsulfonyl)vinyl) benzene(4n)<sup>[5]</sup>**

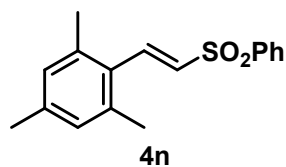

Yield: 61%, 34.9 mg; appearance: white solid, M.P.: 116-118 °C.

**<sup>1</sup>H NMR (400 MHz, CDCl<sub>3</sub>)** δ 7.97 – 7.94 (m, 2H), 7.87 (d, *J* = 16.0 Hz, 1H), 7.65 – 7.60 (m, 1H), 7.58 – 7.54 (m, 2H), 6.88 (s, 2H), 6.54 (d, *J* = 15.6 Hz, 1H), 2.29 (s, 6H), 2.27 (s, 3H).

$^{13}\text{C}$  NMR (100 MHz,  $\text{CDCl}_3$ )  $\delta$  140.81, 140.76, 139.41, 137.06, 133.25, 131.51, 129.37, 129.28, 128.35, 127.47, 21.03, 20.99.

**(*E*)-1-mesitylpent-1-en-3-one(4o)<sup>[2]</sup>**

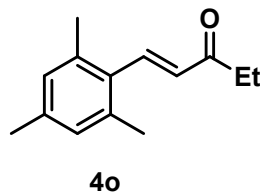

Yield: 97%, 39.2 mg; appearance: white solid, M.P.: 43-45 °C.

$^1\text{H}$  NMR (400 MHz,  $\text{CDCl}_3$ )  $\delta$  7.72 (d,  $J = 16.8$  Hz, 1H), 6.90 (s, 2H), 6.36 (d,  $J = 16.4$  Hz, 1H), 2.70 (q,  $J = 7.2$  Hz, 2H), 2.33 (s, 6H), 2.29 (s, 3H), 1.19 (t,  $J = 7.2$  Hz, 3H).

$^{13}\text{C}$  NMR (100 MHz,  $\text{CDCl}_3$ )  $\delta$  200.97, 140.66, 138.29, 136.75, 131.12, 131.01, 129.13, 33.98, 21.04, 20.99, 8.18.

**diethyl (*E*)-(2,4,6-trimethylstyryl) phosphonate(4p)<sup>[6]</sup>**

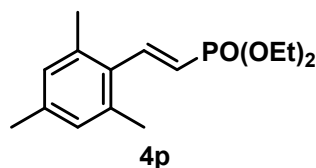

Yield: 63%, 35.6 mg; appearance: yellow oil.

$^1\text{H}$  NMR (400 MHz,  $\text{CDCl}_3$ )  $\delta$  7.59 (dd,  $J = 23.6, 18.0$  Hz, 1H), 6.88 (s, 2H), 5.86 (dd,  $J = 20.4, 18.0$  Hz, 1H), 4.18 – 4.10 (m, 4H), 2.31 (s, 6H), 2.27 (s, 3H), 1.36 (t,  $J = 7.2$  Hz, 6H).

$^{13}\text{C}$  NMR (100 MHz,  $\text{CDCl}_3$ )  $\delta$  147.49 (d,  $J = 6.0$  Hz), 138.08, 136.04, 131.98 (d,  $J = 22.0$  Hz), 129.01, 119.96 (d,  $J = 184.0$  Hz), 61.72 (d,  $J = 5.0$  Hz), 20.95, 20.84, 16.38 (d,  $J = 6.0$  Hz).

$^{31}\text{P}$  NMR (162 MHz,  $\text{CDCl}_3$ )  $\delta$  18.77 (s).

**1,3,5-trimethyl-2-((1*E*,3*E*)-4-phenylbuta-1,3-dien-1-yl) benzene(4q)**

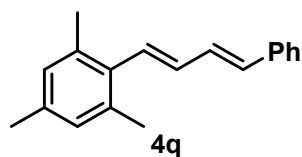

Yield: 62%, 30.8 mg; appearance: yellow oil.



**<sup>1</sup>H NMR (400 MHz, CDCl<sub>3</sub>)** δ 7.46 (d, *J* = 7.6 Hz, 2H), 7.34 (t, *J* = 7.6 Hz, 2H), 7.25 – 7.18 (m, 1H), 7.00 (dd, *J* = 15.2, 10.4 Hz, 1H), 6.90 (s, 2H), 6.71 (d, *J* = 16.0 Hz, 1H), 6.60 (d, *J* = 15.6 Hz, 1H), 6.48 (dd, *J* = 15.6, 10.4 Hz, 1H), 2.35 (s, 6H), 2.30 (s, 3H).

**<sup>13</sup>C NMR (100 MHz, CDCl<sub>3</sub>)** δ 137.38, 136.32, 136.05, 134.20, 133.62, 131.76, 131.06, 129.77, 128.80, 128.61, 127.39, 126.28, 21.17, 20.95.

**ESI-MS:** Calcd for C<sub>19</sub>H<sub>20</sub>: [M+H<sup>+</sup>] 249.1638, found 249.1635.

**(*E*)-1,3,5-trimethyl-2-(3-phenylprop-1-en-1-yl) benzene(4r)<sup>[7]</sup>**

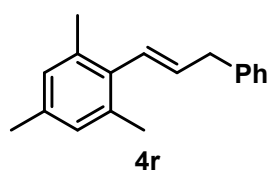

Yield: 70%, 33.1 mg; appearance: colorless oil.

**<sup>1</sup>H NMR (400 MHz, CDCl<sub>3</sub>)** δ 7.38 – 7.30 (m, 4H), 7.26 – 7.21 (m, 1H), 6.94 (s, 2H), 6.37 – 6.26 (m, 2H), 3.58 (d, *J* = 4.0 Hz, 2H), 2.37 (s, 6H), 2.34 (s, 3H).

**<sup>13</sup>C NMR (100 MHz, CDCl<sub>3</sub>)** δ 137.60, 136.60, 135.51, 133.07, 129.81, 128.84, 128.39, 127.67, 126.85, 125.96, 32.55, 20.85, 19.88.

**(*E*)-1,3,5-trimethyl-2-(4-phenylbut-1-en-1-yl)benzene(4s)**

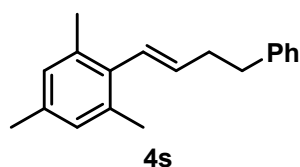

Yield: 53%, 26.5 mg; appearance: colorless oil.

**<sup>1</sup>H NMR (400 MHz, CDCl<sub>3</sub>)** δ 7.39 – 7.36 (m, 2H), 7.34 – 7.29 (m, 2H), 7.24 – 7.20 (m, 1H), 6.87 (s, 2H), 6.47 (d, *J* = 16.0 Hz, 1H), 6.33 (dt, *J* = 15.6, 6.8 Hz, 1H), 2.80 – 2.75 (m, 2H), 2.41 – 2.36 (m, 2H), 2.34 (s, 6H), 2.28 (s, 3H).

**<sup>13</sup>C NMR (100 MHz, CDCl<sub>3</sub>)** δ 137.65, 135.94, 135.42, 135.10, 130.34, 129.91, 128.90, 128.50, 126.92, 125.93, 32.62, 29.28, 20.80, 19.80.

**ESI-MS:** Calcd for C<sub>19</sub>H<sub>22</sub>O: [M+H<sup>+</sup>] 251.1794, found 251.1788.

**ethyl (*E*)-3-(4-isopropyl-2,6-dimethylphenyl)acrylate(4t)**

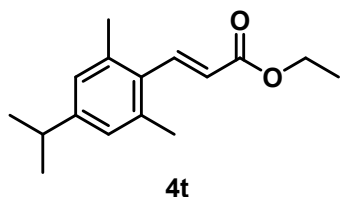

Yield: 71%, 35.0 mg; appearance: yellow oil.

**<sup>1</sup>H NMR (400 MHz, CDCl<sub>3</sub>)** δ 7.84 (d, *J* = 16.4 Hz, 1H), 6.94 (s, 2H), 6.07 (d, *J* = 16.4 Hz, 1H), 4.28 (q, *J* = 7.2 Hz, 2H), 2.89 – 2.78 (m, 1H), 2.36 (s, 6H), 1.35 (t, *J* = 7.2 Hz, 3H), 1.25 (s, 3H), 1.23 (s, 3H).

**<sup>13</sup>C NMR (100 MHz, CDCl<sub>3</sub>)** δ 167.02, 149.21, 143.21, 136.87, 131.41, 126.49, 123.23, 60.44, 33.78, 23.81, 21.26, 14.31.

**ESI-MS:** Calcd for C<sub>16</sub>H<sub>22</sub>O<sub>2</sub>: [M+H<sup>+</sup>] 247.1693, found 247.1692.

**ethyl (*E*)-3-(4-cyclohexyl-2,6-dimethylphenyl)acrylate(4u)**

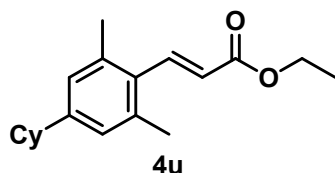

Yield: 80%, 45.8 mg; appearance: pink solid, M.P.: 58-59 °C.

**<sup>1</sup>H NMR (400 MHz, CDCl<sub>3</sub>)** δ 7.85 (d, *J* = 16.0 Hz, 1H), 6.93 (s, 2H), 6.07 (d, *J* = 16.4 Hz, 1H), 4.28 (q, *J* = 7.2 Hz, 2H), 2.46 – 2.38 (m, 1H), 2.36 (s, 6H), 1.87 – 1.84 (m, 4H), 1.78 – 1.74 (m, 1H), 1.44 – 1.33 (m, 8H).

**<sup>13</sup>C NMR (100 MHz, CDCl<sub>3</sub>)** δ 167.00, 148.44, 143.20, 136.80, 131.38, 126.90, 123.16, 60.40, 44.27, 34.25, 26.83, 26.11, 21.24, 14.29.

**ESI-MS:** Calcd for C<sub>19</sub>H<sub>26</sub>O<sub>2</sub>: [M+H<sup>+</sup>] 287.2006, found 287.2005.

**ethyl (*E*)-3-(4-methoxy-2,6-dimethylphenyl)acrylate(4v)**

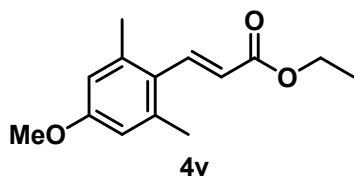

Yield: 55%, 25.8 mg; appearance: white solid, M.P.: 63-64 °C.

**<sup>1</sup>H NMR (400 MHz, CDCl<sub>3</sub>)** δ 7.84 (d, *J* = 16.4 Hz, 1H), 6.62 (s, 2H), 6.03 (d, *J* = 16.4 Hz, 1H), 4.27 (q, *J* = 7.2 Hz, 2H), 3.79 (s, 3H), 2.37 (s, 6H), 1.34 (t, *J* = 6.8

Hz, 3H).

**<sup>13</sup>C NMR (100 MHz, CDCl<sub>3</sub>)** δ 167.23, 159.25, 142.66, 139.02, 126.30, 122.08, 113.81, 60.38, 55.09, 21.66, 14.32.

**ESI-MS:** Calcd for C<sub>14</sub>H<sub>18</sub>O<sub>3</sub>: [M+H<sup>+</sup>] 235.1329, found 235.1325.

**ethyl (*E*)-3-(2,6-dimethyl-4-phenoxyphenyl)acrylate(4w)**

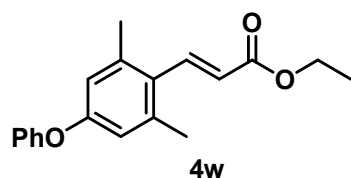

Yield: 61%, 36.2 mg; appearance: yellow oil.

**<sup>1</sup>H NMR (400 MHz, CDCl<sub>3</sub>)** δ 7.82 (d, *J* = 16.4 Hz, 1H), 7.39 – 7.33 (m, 2H), 7.16 – 7.11 (m, 1H), 7.05 – 7.01 (m, 2H), 6.70 (s, 2H), 6.06 (d, *J* = 16.4 Hz, 1H), 4.28 (q, *J* = 7.2 Hz, 2H), 2.33 (s, 6H), 1.35 (t, *J* = 7.2 Hz, 3H).

**<sup>13</sup>C NMR (100 MHz, CDCl<sub>3</sub>)** δ 166.98, 157.10, 156.53, 142.48, 139.07, 129.77, 128.68, 123.58, 123.09, 119.36, 118.00, 60.48, 21.41, 14.31.

**ESI-MS:** Calcd for C<sub>19</sub>H<sub>20</sub>O<sub>3</sub>: [M+H<sup>+</sup>] 297.1485, found 297.1485.

**ethyl (*E*)-3-(4-(difluoromethoxy)-2,6-dimethylphenyl)acrylate(4x)**

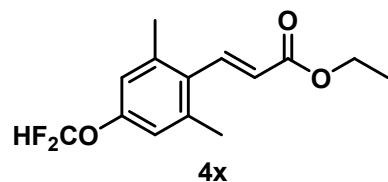

Yield: 53%, 28.6 mg; appearance: yellow oil.

**<sup>1</sup>H NMR (400 MHz, CDCl<sub>3</sub>)** δ 7.76 (d, *J* = 16.4 Hz, 1H), 6.82 (s, 2H), 6.50 (t, *J* = 73.6 Hz, 1H), 6.04 (d, *J* = 16.4 Hz, 1H), 4.28 (q, *J* = 6.8 Hz, 2H), 2.34 (s, 6H), 1.35 (t, *J* = 6.8 Hz, 3H).

**<sup>13</sup>C NMR (100 MHz, CDCl<sub>3</sub>)** δ 166.61, 150.59 (t, *J* = 3.0 Hz), 142.08, 138.87, 131.19, 124.25, 118.73, 115.78 (t, *J* = 258.0 Hz), 60.61, 21.20, 14.27.

**<sup>19</sup>F NMR (376 MHz, CDCl<sub>3</sub>)** δ -80.66.

**ESI-MS:** Calcd for C<sub>14</sub>H<sub>16</sub>F<sub>2</sub>O<sub>3</sub>: [M+H<sup>+</sup>] 271.1140, found 271.1140.

**ethyl (*E*)-3-(3,4',5-trimethyl-[1,1'-biphenyl]-4-yl)acrylate(4y)**

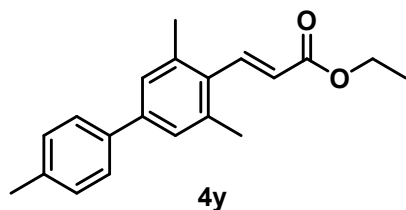

Yield: 60%, 35.3 mg; appearance: yellow oil.

**<sup>1</sup>H NMR (400 MHz, CDCl<sub>3</sub>)** δ 7.81 (d, *J* = 16.4 Hz, 1H), 7.41 (d, *J* = 8.0 Hz, 2H), 7.21 (s, 2H), 7.16 (d, *J* = 7.6 Hz, 2H), 6.04 (d, *J* = 16.4 Hz, 1H), 4.21 (q, *J* = 7.2 Hz, 2H), 2.34 (s, 6H), 2.31 (s, 3H), 1.28 (t, *J* = 7.2 Hz, 3H).

**<sup>13</sup>C NMR (100 MHz, CDCl<sub>3</sub>)** δ 166.92, 142.88, 140.97, 137.56, 137.30, 132.59, 129.46, 126.84, 123.65, 60.54, 21.36, 21.11, 14.32.

**ESI-MS:** Calcd for C<sub>20</sub>H<sub>22</sub>O<sub>2</sub>: [M+Na<sup>+</sup>] 317.1512, found 317.1516.

**ethyl (*E*)-3-(4-fluoro-2,6-dimethylphenyl)acrylate(4z)**

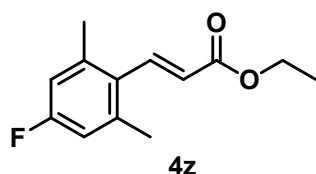

Yield: 62%, 27.6 mg; appearance: yellow oil.

**<sup>1</sup>H NMR (400 MHz, CDCl<sub>3</sub>)** δ 7.76 (d, *J* = 16.4 Hz, 1H), 6.77 (d, *J* = 9.6 Hz, 2H), 6.03 (d, *J* = 16.4 Hz, 1H), 4.28 (q, *J* = 7.2 Hz, 2H), 2.34 (s, 6H), 1.34 (t, *J* = 7.2 Hz, 3H).

**<sup>13</sup>C NMR (100 MHz, CDCl<sub>3</sub>)** δ 166.71, 161.98 (d, *J* = 246.0 Hz), 142.23, 139.25 (d, *J* = 8.0 Hz), 129.91, 123.98, 114.88 (d, *J* = 20.0 Hz), 60.58, 21.23 (d, *J* = 1.0 Hz), 14.29.

**<sup>19</sup>F NMR (376 MHz, CDCl<sub>3</sub>)** δ -114.17.

**ESI-MS:** Calcd for C<sub>13</sub>H<sub>15</sub>FO<sub>2</sub>: [M+H<sup>+</sup>] 223.1129, found 223.1130.

**ethyl (*E*)-3-(4-chloro-2,6-dimethylphenyl)acrylate(4aa)<sup>[1]</sup>**

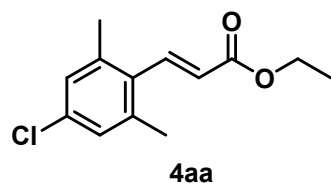

Yield: 70%, 33.4 mg; appearance: colorless oil.

$^1\text{H NMR}$  (400 MHz,  $\text{CDCl}_3$ )  $\delta$  7.75 (d,  $J = 16.0$  Hz, 1H), 7.06 (s, 2H), 6.04 (d,  $J = 16.4$  Hz, 1H), 4.28 (q,  $J = 7.2$  Hz, 2H), 2.32 (s, 6H), 1.34 (t,  $J = 7.2$  Hz, 3H).

$^{13}\text{C NMR}$  (100 MHz,  $\text{CDCl}_3$ )  $\delta$  166.55, 142.06, 138.42, 133.59, 132.41, 128.00, 124.38, 60.64, 20.93, 14.26.

**ethyl (*E*)-3-(4-iodo-2,6-dimethylphenyl)acrylate(4ab)**

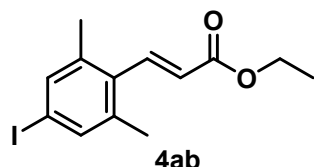

Yield: 68%, 44.9 mg; appearance: yellow oil.

$^1\text{H NMR}$  (400 MHz,  $\text{CDCl}_3$ )  $\delta$  7.72 (d,  $J = 16.0$  Hz, 1H), 7.43 (s, 2H), 6.04 (d,  $J = 16.4$  Hz, 1H), 4.27 (q,  $J = 7.2$  Hz, 2H), 2.29 (s, 6H), 1.34 (t,  $J = 6.8$  Hz, 3H).

$^{13}\text{C NMR}$  (100 MHz,  $\text{CDCl}_3$ )  $\delta$  166.51, 142.18, 138.57, 136.90, 133.63, 124.50, 94.35, 60.66, 20.61, 14.27.

**ESI-MS:** Calcd for  $\text{C}_{13}\text{H}_{15}\text{IO}_2$ :  $[\text{M}+\text{H}^+]$  331.0189, found 331.0190.

**ethyl (*E*)-3-(4-((*N*,4-dimethylphenyl)sulfonamido)-2,6-dimethylphenyl)acrylate (4ac)**

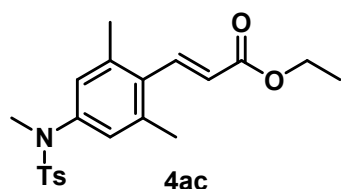

Yield: 70%, 54.2 mg; appearance: white solid, M.P.: 124-126 °C.

$^1\text{H NMR}$  (400 MHz,  $\text{CDCl}_3$ )  $\delta$  7.70 (d,  $J = 16.4$  Hz, 1H), 7.40 (d,  $J = 8.0$  Hz, 2H), 7.18 (d,  $J = 7.6$  Hz, 2H), 6.74 (s, 2H), 5.98 (d,  $J = 16.4$  Hz, 1H), 4.20 (q,  $J = 7.2$  Hz, 2H), 3.05 (s, 3H), 2.35 (s, 3H), 2.21 (s, 6H), 1.27 (t,  $J = 6.8$  Hz, 3H).

$^{13}\text{C NMR}$  (100 MHz,  $\text{CDCl}_3$ )  $\delta$  166.62, 143.57, 142.28, 141.12, 137.47, 133.63, 132.90, 129.29, 127.86, 125.95, 124.23, 60.59, 37.93, 21.53, 21.11, 14.26.

**ESI-MS:** Calcd for  $\text{C}_{21}\text{H}_{25}\text{NO}_4\text{S}$ :  $[\text{M}+\text{H}^+]$  388.1577, found 388.1576.

**methyl (*E*)-4-(3-ethoxy-3-oxoprop-1-en-1-yl)-3,5-dimethylbenzoate(4ad)**

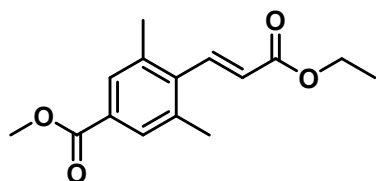

**4ad**

Yield: 83%, 43.5 mg; appearance: white solid, M.P.: 52-54 °C.

<sup>1</sup>H NMR (400 MHz, CDCl<sub>3</sub>) δ 7.77 (d, *J* = 16.4 Hz, 1H), 7.70 (s, 2H), 6.06 (d, *J* = 16.8 Hz, 1H), 4.27 (q, *J* = 7.2 Hz, 2H), 3.88 (s, 3H), 2.35 (s, 6H), 1.33 (t, *J* = 7.2 Hz, 3H).

<sup>13</sup>C NMR (100 MHz, CDCl<sub>3</sub>) δ 166.79, 166.25, 142.25, 138.64, 136.63, 129.27, 128.96, 125.06, 60.63, 52.00, 20.85, 14.19.

ESI-MS: Calcd for C<sub>15</sub>H<sub>18</sub>O<sub>4</sub>: [M+H<sup>+</sup>] 263.1278, found 263.1274.

**(E)-5-cyclohexyl-1,3-dimethyl-2-(3-phenylprop-1-en-1-yl)benzene(4ae)**

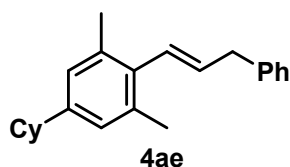

**4ae**

Yield: 63%, 38.4 mg; appearance: yellow oil.

<sup>1</sup>H NMR (400 MHz, CDCl<sub>3</sub>) δ 7.39 – 7.29 (m, 4H), 7.24 (t, *J* = 7.2 Hz, 1H), 6.97 (s, 2H), 6.38 – 6.29 (m, 2H), 3.59 (d, *J* = 2.8 Hz, 2H), 2.53 – 2.46 (m, 1H), 2.40 (s, 6H), 1.96 – 1.89 (m, 4H), 1.84 – 1.80 (m, 1H), 1.55 – 1.44 (m, 4H), 1.37 – 1.34 (m, 1H).

<sup>13</sup>C NMR (100 MHz, CDCl<sub>3</sub>) δ 145.86, 137.60, 136.49, 133.54, 129.88, 128.38, 127.70, 126.84, 126.59, 125.96, 44.12, 34.49, 32.79, 26.96, 26.20, 20.08.

ESI-MS: Calcd for C<sub>23</sub>H<sub>28</sub>: [M-H<sup>+</sup>] 303.2118, found 303.2124.

**ethyl (E)-3-(2,4-dimethyl-6-(methyl-*d*<sub>3</sub>)phenyl)acrylate(4a-*d*<sub>3</sub>)**

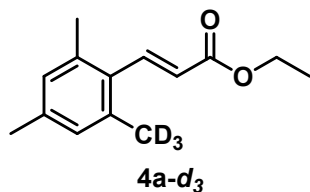

**4a-*d*<sub>3</sub>**

Yield: 88%, 39.0 mg; appearance: yellow solid, M.P.: 33-35 °C.

<sup>1</sup>H NMR (400 MHz, CDCl<sub>3</sub>) δ 7.85 (d, *J* = 16.4 Hz, 1H), 6.90 (s, 2H), 6.06 (d, *J* =

16.4 Hz, 1H), 4.28 (q,  $J = 7.2$  Hz, 2H), 2.34 (s, 3H), 2.29 (s, 3H), 1.35 (t,  $J = 7.2$  Hz, 3H).

$^{13}\text{C}$  NMR (100 MHz,  $\text{CDCl}_3$ )  $\delta$  167.00, 143.13, 138.24, 136.80, 136.69, 130.95, 129.11, 123.13, 60.43, 21.05, 21.00, 14.29.

ESI-MS: Calcd for  $\text{C}_{14}\text{H}_{15}\text{D}_3\text{O}_2$ :  $[\text{M}+\text{H}^+]$  222.1568, found 222.1569.

ethyl (*E*)-3-(2,4-dimethoxy-6-(methyl- $d_3$ )phenyl)acrylate(4b- $d_3$ )

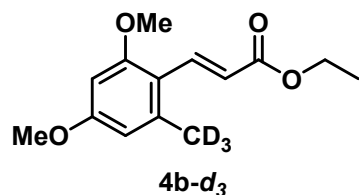

Yield: 65%, 32.9 mg; appearance: white solid, M.P.: 68-70 °C.

$^1\text{H}$  NMR (400 MHz,  $\text{CDCl}_3$ )  $\delta$  7.88 (d,  $J = 16.0$  Hz, 1H), 6.61 (d,  $J = 16.4$  Hz, 1H), 6.35 (dd,  $J = 12.0, 2.4$  Hz, 2H), 4.25 (q,  $J = 6.8$  Hz, 2H), 3.85 (s, 3H), 3.81 (s, 3H), 1.33 (t,  $J = 7.2$  Hz, 3H).

$^{13}\text{C}$  NMR (100 MHz,  $\text{CDCl}_3$ )  $\delta$  168.59, 161.15, 160.99, 141.41, 138.33, 119.15, 115.32, 107.53, 96.27, 60.09, 55.38, 55.25, 14.38.

ESI-MS: Calcd for  $\text{C}_{14}\text{H}_{15}\text{D}_3\text{O}_4$ :  $[\text{M}+\text{H}^+]$  254.1466, found 254.1465.

ethyl (*E*)-3-(8-methoxy-6-(methyl- $d_3$ )quinolin-5-yl)acrylate(4c- $d_3$ )

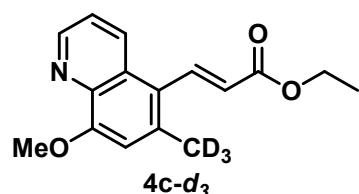

Yield: 70%, 38.4 mg; appearance: yellow solid, M.P.: 104-106 °C.

$^1\text{H}$  NMR (400 MHz,  $\text{CDCl}_3$ )  $\delta$  8.87 – 8.85 (m, 1H), 8.40 – 8.36 (m, 1H), 8.07 (d,  $J = 16.0$  Hz, 1H), 7.43 – 7.39 (m, 1H), 6.89 (s, 1H), 6.14 (d,  $J = 16.4$  Hz, 1H), 4.30 (q,  $J = 7.2$  Hz, 2H), 4.08 (s, 3H), 1.35 (t,  $J = 7.2$  Hz, 3H).

$^{13}\text{C}$  NMR (100 MHz,  $\text{CDCl}_3$ )  $\delta$  166.58, 155.21, 148.35, 140.83, 139.06, 136.06, 132.82, 127.62, 124.71, 122.59, 121.93, 110.63, 60.60, 55.96, 14.28.

ESI-MS: Calcd for  $\text{C}_{16}\text{H}_{14}\text{D}_3\text{NO}_3$ :  $[\text{M}+\text{H}^+]$  275.1470, found 275.1469.

ethyl (*E*)-3-(4-methyl-2,6-bis(methyl- $d_3$ )phenyl)acrylate(4a- $d_6$ )

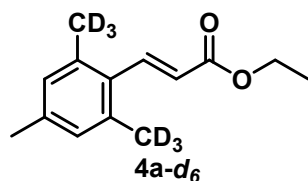

Yield: 71%, 31.9 mg; appearance: yellow solid, M.P.: 36-37 °C.

<sup>1</sup>H NMR (400 MHz, CDCl<sub>3</sub>) δ 7.84 (d, *J* = 16.0 Hz, 1H), 6.90 (s, 2H), 6.05 (d, *J* = 16.4 Hz, 1H), 4.28 (q, *J* = 7.6 Hz, 2H), 2.29 (s, 3H), 1.35 (t, *J* = 7.6 Hz, 3H).

<sup>13</sup>C NMR (100 MHz, CDCl<sub>3</sub>) δ 167.03, 143.14, 138.27, 136.72, 130.98, 129.13, 123.11, 60.45, 21.02, 14.31.

ESI-MS: Calcd for C<sub>14</sub>H<sub>12</sub>D<sub>6</sub>O<sub>2</sub>: [M+H<sup>+</sup>] 225.1756, found 225.1753.

**ethyl (*E*)-3-(4-isopropyl-2,6-bis(methyl-*d*<sub>3</sub>)phenyl)acrylate(4t-*d*<sub>6</sub>)**

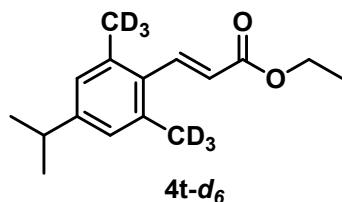

Yield: 69%, 34.8 mg; appearance: yellow oil.

<sup>1</sup>H NMR (400 MHz, CDCl<sub>3</sub>) δ 7.85 (d, *J* = 16.4 Hz, 1H), 6.94 (s, 2H), 6.07 (d, *J* = 16.0 Hz, 1H), 4.28 (q, *J* = 7.2 Hz, 2H), 2.88 – 2.80 (m, 1H), 1.35 (t, *J* = 6.8 Hz, 3H), 1.26 (s, 3H), 1.24 (s, 3H).

<sup>13</sup>C NMR (100 MHz, CDCl<sub>3</sub>) δ 167.05, 149.22, 143.16, 136.79, 131.39, 126.49, 123.11, 60.45, 33.77, 23.81, 14.30.

ESI-MS: Calcd for C<sub>16</sub>H<sub>16</sub>D<sub>6</sub>O<sub>2</sub>: [M+H<sup>+</sup>] 253.2069, found 253.2067.

**ethyl (*E*)-3-(4-((*N*,4-dimethylphenyl)sulfonamido)-2,6-bis(methyl-*d*<sub>3</sub>)phenyl)acrylate(4ac-*d*<sub>6</sub>)**

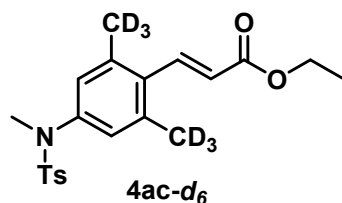

Yield: 68%, 53.5 mg; appearance: yellow solid, M.P.: 124-125 °C.

<sup>1</sup>H NMR (400 MHz, CDCl<sub>3</sub>) δ 7.70 (d, *J* = 16.4 Hz, 1H), 7.40 (d, *J* = 8.0 Hz, 2H),



7.18 (d,  $J = 8.4$  Hz, 2H), 6.74 (s, 2H), 5.98 (d,  $J = 16.4$  Hz, 1H), 4.20 (q,  $J = 7.2$  Hz, 2H), 3.05 (s, 3H), 2.35 (s, 3H), 1.27 (t,  $J = 7.2$  Hz, 3H).

$^{13}\text{C}$  NMR (100 MHz,  $\text{CDCl}_3$ )  $\delta$  159.58, 136.54, 135.21, 134.09, 130.34, 126.57, 125.87, 122.26, 120.81, 118.91, 117.14, 53.55, 30.89, 14.48, 7.22.

ESI-MS: Calcd for  $\text{C}_{21}\text{H}_{19}\text{D}_6\text{NO}_4\text{S}$ :  $[\text{M}+\text{H}^+]$  394.1954, found 394.1954.

ethyl (*E*)-3-(4-cyclohexyl-2,6-bis(methyl- $d_3$ )phenyl)acrylate(4u- $d_6$ )

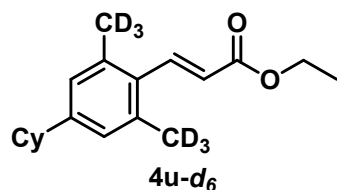

Yield: 76%, 44.5 mg; appearance: pink solid, M.P.: 56-58 °C.

$^1\text{H}$  NMR (400 MHz,  $\text{CDCl}_3$ )  $\delta$  7.84 (d,  $J = 16.0$  Hz, 1H), 6.92 (s, 2H), 6.06 (d,  $J = 16.4$  Hz, 1H), 4.27 (q,  $J = 7.2$  Hz, 2H), 2.47 – 2.39 (m, 1H), 1.86 – 1.84 (m, 4H), 1.77 – 1.73 (m, 1H), 1.44 – 1.32 (m, 8H).

$^{13}\text{C}$  NMR (100 MHz,  $\text{CDCl}_3$ )  $\delta$  167.04, 148.47, 143.19, 136.74, 131.42, 126.92, 123.11, 60.42, 44.28, 34.26, 26.84, 26.12, 14.31.

ESI-MS: Calcd for  $\text{C}_{19}\text{H}_{20}\text{D}_6\text{O}_2$ :  $[\text{M}+\text{H}^+]$  293.2382, found 293.2380.

ethyl (*E*)-3-(2,6-bis(methyl- $d_3$ )-4-phenoxyphenyl)acrylate(4w- $d_3$ )

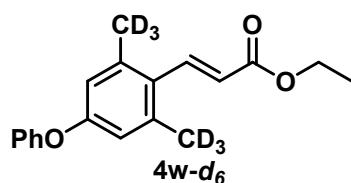

Yield: 62%, 37.5 mg; appearance: yellow oil.

$^1\text{H}$  NMR (400 MHz,  $\text{CDCl}_3$ )  $\delta$  8.18 (d,  $J = 15.6$  Hz, 1H), 7.72 – 7.67 (m, 2H), 7.50 – 7.45 (m, 1H), 7.40 – 7.36 (m, 2H), 7.05 (s, 2H), 6.41 (d,  $J = 16.4$  Hz, 1H), 4.63 (q,  $J = 7.2$  Hz, 2H), 1.70 (t,  $J = 7.2$  Hz, 3H).

$^{13}\text{C}$  NMR (100 MHz,  $\text{CDCl}_3$ )  $\delta$  166.93, 157.07, 156.45, 142.39, 138.94, 129.72, 128.62, 123.53, 122.92, 119.31, 117.96, 60.42, 14.26.

ESI-MS: Calcd for  $\text{C}_{19}\text{H}_{14}\text{D}_6\text{O}_3$ :  $[\text{M}+\text{H}^+]$  303.1862, found 303.1858.

ethyl (*E*)-3-(4-chloro-2,6-bis(methyl- $d_3$ )phenyl)acrylate(4aa- $d_6$ )

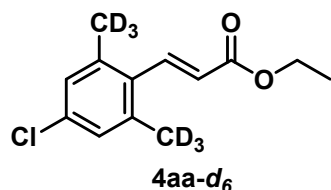

Yield: 66%, 32.3 mg; appearance: yellow solid, M.P.: 37-38 °C.

<sup>1</sup>H NMR (400 MHz, CDCl<sub>3</sub>) δ 7.74 (d, *J* = 16.4 Hz, 1H), 7.05 (s, 2H), 6.04 (d, *J* = 16.4 Hz, 1H), 4.27 (q, *J* = 7.2 Hz, 2H), 1.34 (t, *J* = 6.8 Hz, 3H).

<sup>13</sup>C NMR (100 MHz, CDCl<sub>3</sub>) δ 166.50, 141.97, 138.28, 133.57, 132.38, 127.98, 124.27, 60.58, 14.23.

ESI-MS: Calcd for C<sub>13</sub>H<sub>9</sub>D<sub>6</sub>ClO<sub>2</sub>: [M+H<sup>+</sup>] 245.1210, found 245.1209.

**methyl (*E*)-4-(3-ethoxy-3-oxoprop-1-en-1-yl)-3,5-bis(methyl-*d*<sub>3</sub>)benzoate**

**(4ad-*d*<sub>6</sub>)**

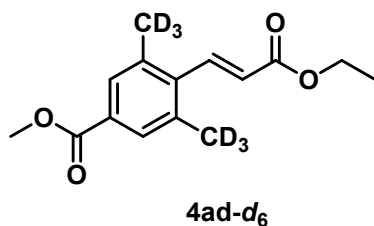

Yield: 81%, 43.5 mg; appearance: white solid, M.P.: 50-52 °C.

<sup>1</sup>H NMR (400 MHz, CDCl<sub>3</sub>) δ 7.77 (d, *J* = 16.4 Hz, 1H), 7.70 (s, 2H), 6.06 (d, *J* = 16.4 Hz, 1H), 4.27 (q, *J* = 7.2 Hz, 2H), 3.88 (s, 3H), 1.33 (t, *J* = 7.2 Hz, 3H).

<sup>13</sup>C NMR (100 MHz, CDCl<sub>3</sub>) δ 166.79, 166.26, 142.23, 138.67, 136.54, 129.29, 128.99, 125.03, 60.63, 51.99, 14.19.

ESI-MS: Calcd for C<sub>15</sub>H<sub>12</sub>D<sub>6</sub>O<sub>4</sub>: [M+H<sup>+</sup>] 269.1654, found 269.1656.

**(*E*)-5-cyclohexyl-1,3-bis(methyl-*d*<sub>3</sub>)-2-(3-phenylprop-1-en-1-yl)benzene(4ae-*d*<sub>6</sub>)**

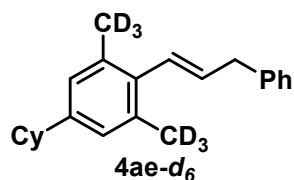

Yield: 57%, 35.4 mg; appearance: yellow oil.

<sup>1</sup>H NMR (400 MHz, CDCl<sub>3</sub>) δ 7.35 – 7.26 (m, 4H), 7.22 – 7.17 (m, 1H), 6.92 (s, 2H), 6.34 – 6.26 (m, 2H), 3.55 – 3.53 (m, 2H), 2.48 – 2.41 (m, 1H), 1.92 – 1.85 (m, 4H), 1.80 – 1.75 (m, 1H), 1.53 – 1.42 (m, 4H), 1.40 – 1.35 (m, 1H).

$^{13}\text{C}$  NMR (100 MHz,  $\text{CDCl}_3$ )  $\delta$  145.86, 137.61, 136.38, 133.60, 129.87, 128.39, 127.74, 126.84, 126.59, 125.96, 44.13, 34.49, 32.78, 26.96, 26.21.

ESI-MS: Calcd for  $\text{C}_{23}\text{H}_{22}\text{D}_6$ :  $[\text{M}-\text{H}^+]$  309.2495, found 309.2500.

**(*E*)-1,5-dimethyl-3-(methyl- $d_3$ )-2-(4-phenylbut-1-en-1-yl)benzene(4s- $d_3$ )**

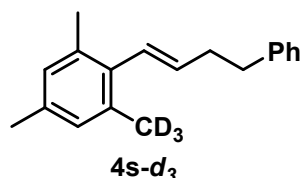

Yield: 47%, 23.8 mg; appearance: yellow oil.

$^1\text{H}$  NMR (400 MHz,  $\text{CDCl}_3$ )  $\delta$  7.37 (d,  $J = 7.6$  Hz, 2H), 7.31 (t,  $J = 7.2$  Hz, 2H), 7.21 (t,  $J = 7.2$  Hz, 1H), 6.87 (s, 2H), 6.46 (d,  $J = 16.0$  Hz, 1H), 6.37 – 6.29 (m, 1H), 2.80 – 2.75 (m, 2H), 2.40 – 2.35 (m, 2H), 2.33 (s, 3H), 2.27 (s, 3H).

$^{13}\text{C}$  NMR (100 MHz,  $\text{CDCl}_3$ )  $\delta$  137.66, 135.96, 135.45, 135.10, 130.35, 129.92, 128.90, 128.50, 126.92, 125.94, 32.64, 29.28, 20.80, 19.79.

ESI-MS: Calcd for  $\text{C}_{19}\text{H}_{19}\text{D}_3$ :  $[\text{M}+\text{H}^+]$  254.1983, found 254.1979.

**(1*R*,2*S*,5*R*)-2-isopropyl-5-methylcyclohexyl (*E*)-3-mesitylacrylate(4af)**

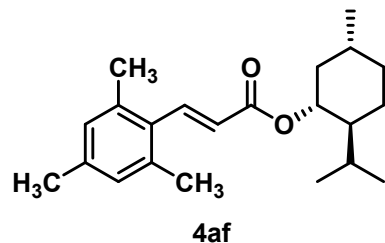

Yield: 94%, 61.8 mg; appearance: colorless oil.

$^1\text{H}$  NMR (400 MHz,  $\text{CDCl}_3$ )  $\delta$  7.85 (d,  $J = 16.4$  Hz, 1H), 6.90 (s, 2H), 6.06 (d,  $J = 16.0$  Hz, 1H), 4.88 – 4.80 (m, 1H), 2.35 (s, 6H), 2.29 (s, 3H), 2.14 – 2.10 (m, 1H), 1.99 – 1.89 (m, 1H), 1.74 – 1.70 (m, 2H), 1.61 – 1.44 (m, 2H), 1.15 – 1.02 (m, 2H), 0.96 – 0.92 (m, 7H), 0.83 (d,  $J = 7.2$  Hz, 3H).

$^{13}\text{C}$  NMR (100 MHz,  $\text{CDCl}_3$ )  $\delta$  166.58, 142.82, 138.16, 136.81, 130.89, 129.12, 123.41, 74.22, 47.12, 41.01, 34.28, 31.39, 26.49, 23.71, 22.02, 21.11, 21.00, 20.66, 16.63.

ESI-MS: Calcd for  $\text{C}_{22}\text{H}_{32}\text{O}_2$ :  $[\text{M}-\text{H}^+]$  327.2330, found 327.2335.

**benzo[*d*][1,3]dioxol-5-yl (*E*)-3-mesitylacrylate(4ag)**

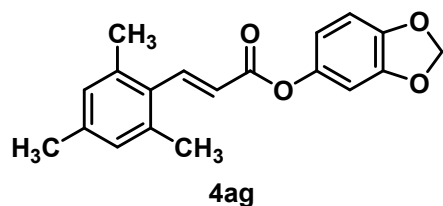

Yield: 81%, 50.3 mg; appearance: white solid, M.P.: 89-91 °C.

<sup>1</sup>H NMR (400 MHz, CDCl<sub>3</sub>) δ 8.06 (d, *J* = 16.4 Hz, 1H), 6.95 (s, 2H), 6.83 (d, *J* = 8.4 Hz, 1H), 6.75 (d, *J* = 2.4 Hz, 1H), 6.66 (dd, *J* = 8.4, 2.0 Hz, 1H), 6.27 (d, *J* = 16.4 Hz, 1H), 6.01 (s, 2H), 2.41 (s, 6H), 2.33 (s, 3H).

<sup>13</sup>C NMR (100 MHz, CDCl<sub>3</sub>) δ 165.60, 147.93, 145.23, 145.12, 145.09, 138.73, 137.04, 130.46, 129.27, 121.81, 113.91, 107.87, 103.77, 101.61, 21.13, 21.00.

ESI-MS: Calcd for C<sub>19</sub>H<sub>18</sub>O<sub>4</sub>: [M+H<sup>+</sup>] 311.1278, found 311.1277.

**(*R*)-2,5,7,8-tetramethyl-2-((4*R*,8*R*)-4,8,12-trimethyltridecyl)chroman-6-yl (*E*)-3-mesitylacrylate(4ah)**

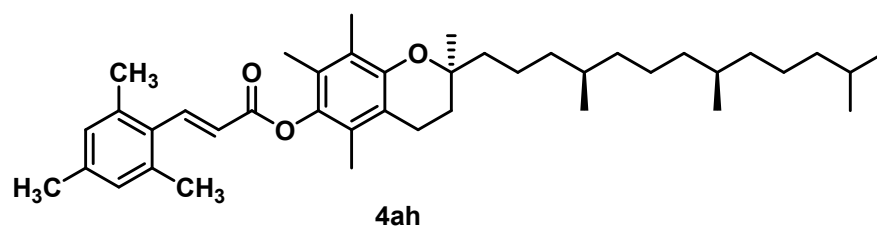

Yield: 75%, 90.4 mg; appearance: colorless oil.

<sup>1</sup>H NMR (400 MHz, CDCl<sub>3</sub>) δ 8.13 (d, *J* = 16.4 Hz, 1H), 6.97 (s, 2H), 6.37 (d, *J* = 16.4 Hz, 1H), 2.66 (t, *J* = 6.4 Hz, 2H), 2.45 (s, 6H), 2.35 (s, 3H), 2.17 (s, 3H), 2.13 (s, 3H), 2.09 (s, 3H), 1.92 – 1.78 (m, 2H), 1.65 – 1.52 (m, 4H), 1.49 – 1.40 (m, 4H), 1.31 – 1.26 (m, 7H), 1.22 – 1.10 (m, 7H), 0.93 – 0.89 (m, 14H).

<sup>13</sup>C NMR (100 MHz, CDCl<sub>3</sub>) δ 165.45, 149.32, 144.58, 140.48, 138.54, 136.92, 130.60, 129.26, 126.80, 125.01, 122.97, 121.96, 117.30, 74.94, 39.32, 37.40, 37.24, 32.74, 32.65, 31.07, 27.92, 24.77, 24.41, 22.68, 22.59, 21.16, 21.02, 20.98, 20.58, 19.71, 19.62, 12.97, 12.13, 11.80.

ESI-MS: Calcd for C<sub>41</sub>H<sub>62</sub>O<sub>3</sub>: [M+H<sup>+</sup>] 603.4772, found 603.4767.

**5-formyl-2-methoxyphenyl (*E*)-3-mesitylacrylate(4ai)**

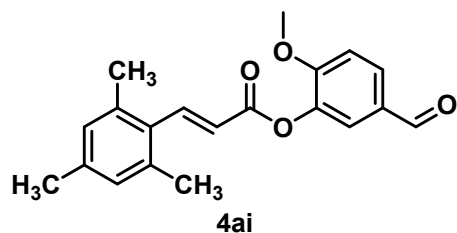

Yield: 73%, 47.4 mg; appearance: red solid, M.P.: 130-131 °C.

**<sup>1</sup>H NMR (400 MHz, CDCl<sub>3</sub>)** δ 9.89 (s, 1H), 8.08 (d, *J* = 16.4 Hz, 1H), 7.79 (dd, *J* = 8.4, 1.6 Hz, 1H), 7.70 (d, *J* = 2.0 Hz, 1H), 7.11 (d, *J* = 8.4 Hz, 1H), 6.93 (s, 2H), 6.32 (d, *J* = 16.4 Hz, 1H), 3.94 (s, 3H), 2.41 (s, 6H), 2.31 (s, 3H).

**<sup>13</sup>C NMR (100 MHz, CDCl<sub>3</sub>)** δ 189.97, 164.57, 156.44, 145.60, 140.22, 138.87, 137.14, 130.23, 129.93, 129.86, 129.30, 123.57, 120.89, 111.94, 56.17, 21.18, 20.99.

**ESI-MS:** Calcd for C<sub>20</sub>H<sub>20</sub>O<sub>4</sub>: [M+H<sup>+</sup>] 325.1434, found 325.1432.

**5-chloro-2-(2,4-dichlorophenoxy)phenyl (*E*)-3-mesitylacrylate(4aj)**

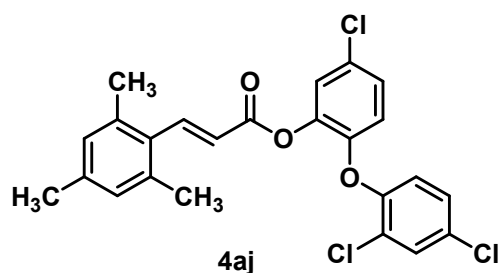

Yield: 83%, 76.7 mg; appearance: colorless oil.

**<sup>1</sup>H NMR (400 MHz, CDCl<sub>3</sub>)** δ 7.94 (d, *J* = 16.4 Hz, 1H), 7.40 (d, *J* = 2.4 Hz, 1H), 7.33 (d, *J* = 2.4 Hz, 1H), 7.22 (dd, *J* = 8.8, 2.4 Hz, 1H), 7.16 (dd, *J* = 8.8, 2.4 Hz, 1H), 6.95 (d, *J* = 8.8 Hz, 1H), 6.91 (s, 2H), 6.87 (d, *J* = 8.8 Hz, 1H), 6.13 (d, *J* = 16.4 Hz, 1H), 2.32 (s, 6H), 2.29 (s, 3H).

**<sup>13</sup>C NMR (100 MHz, CDCl<sub>3</sub>)** δ 164.04, 151.36, 146.42, 146.09, 142.07, 139.06, 137.20, 130.31, 130.24, 129.58, 129.35, 129.09, 128.00, 126.93, 125.47, 124.71, 120.94, 120.62, 119.65, 21.12, 21.08.

**ESI-MS:** Calcd for C<sub>24</sub>H<sub>19</sub>Cl<sub>3</sub>O<sub>3</sub>: [M-H<sup>+</sup>] 459.0327, found 459.0337.

**1,3,3-trimethylbicyclo[2.2.1]heptan-2-yl (*E*)-3-mesitylacrylate(4ak)**

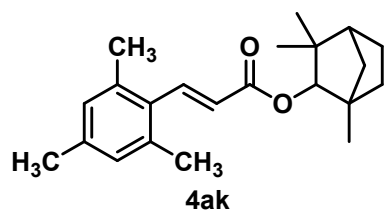

Yield: 89%, 58.1 mg; appearance: yellow oil.

**<sup>1</sup>H NMR (400 MHz, CDCl<sub>3</sub>)** δ 7.87 (d, *J* = 16.4 Hz, 1H), 6.90 (s, 2H), 6.09 (d, *J* = 16.4 Hz, 1H), 4.52 (d, *J* = 1.6 Hz, 1H), 2.35 (s, 6H), 2.29 (s, 3H), 1.88 – 1.80 (m, 1H), 1.77 – 1.71 (m, 2H), 1.66 – 1.63 (m, 1H), 1.53 – 1.44 (m, 1H), 1.30 – 1.21 (m, 2H), 1.17 (s, 3H), 1.11 (s, 3H), 0.85 (s, 3H).

**<sup>13</sup>C NMR (100 MHz, CDCl<sub>3</sub>)** δ 167.39, 142.80, 138.20, 136.76, 130.89, 129.13, 123.17, 86.12, 48.40, 48.38, 41.42, 39.70, 29.73, 26.70, 25.85, 21.07, 21.02, 20.14, 19.44.

**ESI-MS:** Calcd for C<sub>22</sub>H<sub>30</sub>O<sub>2</sub>: [M–H<sup>+</sup>] 325.2173, found 325.2179.

**(3*aS*,4*R*,6*R*,6*aS*)-6-((*R*)-2,2-dimethyl-1,3-dioxolan-4-yl)-2,2-dimethyltetrahydrofuro[3,4-*d*][1,3]dioxol-4-yl (*E*)-3-mesitylacrylate(4al)**

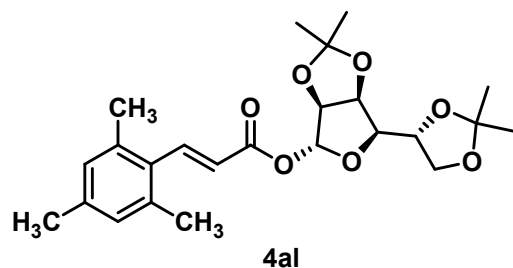

Yield: 89%, 77.0 mg; appearance: white solid, M.P.: 114-116 °C.

**<sup>1</sup>H NMR (400 MHz, CDCl<sub>3</sub>)** δ 7.90 (d, *J* = 16.0 Hz, 1H), 6.90 (s, 2H), 6.27 (s, 1H), 6.02 (d, *J* = 16.0 Hz, 1H), 4.91 (dd, *J* = 6.4, 2.0 Hz, 1H), 4.81 (d, *J* = 6.4 Hz, 1H), 4.46 – 4.41 (m, 1H), 4.14 – 4.07 (m, 3H), 2.34 (s, 6H), 2.29 (s, 3H), 1.52 (s, 3H), 1.47 (s, 3H), 1.39 (s, 3H), 1.36 (s, 3H).

**<sup>13</sup>C NMR (100 MHz, CDCl<sub>3</sub>)** δ 165.28, 144.83, 138.70, 137.04, 130.41, 129.24, 121.81, 113.19, 103.30, 101.00, 85.14, 82.27, 79.29, 72.90, 66.81, 26.97, 25.90, 25.08, 24.59, 21.16, 21.02.

**ESI-MS:** Calcd for C<sub>24</sub>H<sub>32</sub>O<sub>7</sub>: [M+H<sup>+</sup>] 433.2221, found 433.2220.

**(3*S*,8*S*,9*S*,10*R*,13*R*,14*S*,17*R*)-10,13-dimethyl-17-((*R*)-6-methylheptan-2-yl)-**

**2,3,4,7,8,9,10,11,12,13,14,15,16,17-tetradecahydro-1H-cyclopenta[a]phenanthren-3-yl (*E*)-3-mesitylacrylate(4am)**

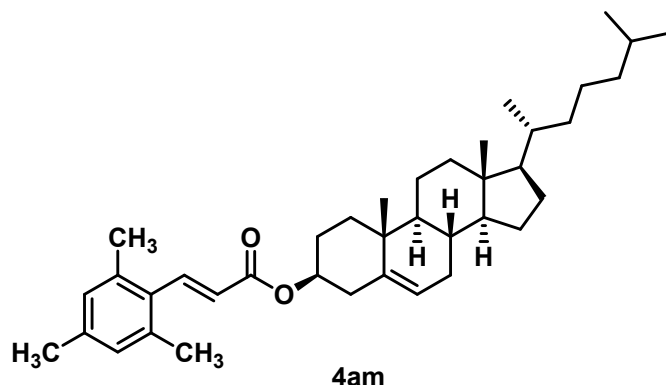

Yield: 95%, 106.2 mg; appearance: white solid, M.P.: 109-111 °C.

**<sup>1</sup>H NMR (400 MHz, CDCl<sub>3</sub>)** δ 7.85 (d, *J* = 16.0 Hz, 1H), 6.89 (s, 2H), 6.05 (d, *J* = 16.4 Hz, 1H), 5.42 (d, *J* = 4.4 Hz, 1H), 4.82 – 4.73 (m, 1H), 2.44 – 2.41 (m, 2H), 2.35 (s, 6H), 2.29 (s, 3H), 2.06 – 1.87 (m, 5H), 1.71 – 1.47 (m, 8H), 1.41 – 1.29 (m, 4H), 1.21 – 1.10 (m, 7H), 1.07 (s, 3H), 1.04 – 0.97 (m, 2H), 0.94 (d, *J* = 6.4 Hz, 3H), 0.91 – 0.88 (m, 6H), 0.70 (s, 3H).

**<sup>13</sup>C NMR (100 MHz, CDCl<sub>3</sub>)** δ 166.31, 142.86, 139.62, 138.08, 136.75, 130.86, 129.09, 123.37, 122.57, 73.97, 56.60, 56.06, 49.94, 42.22, 39.65, 39.46, 38.18, 36.97, 36.53, 36.13, 35.75, 31.84, 31.78, 28.18, 27.95, 27.83, 24.22, 23.80, 22.78, 22.53, 21.09, 20.98, 19.27, 18.66, 11.78.

**ESI-MS:** Calcd for C<sub>39</sub>H<sub>58</sub>O<sub>2</sub>: [M+Na<sup>+</sup>] 581.4329, found 581.4336.

**(*E*)-*N*-(((1*R*,4*aS*,10*aR*)-7-isopropyl-1,4*a*-dimethyl-1,2,3,4,4*a*,9,10,10*a*-octahydrophenanthren-1-yl)methyl)-3-mesitylacrylamide(4an)**

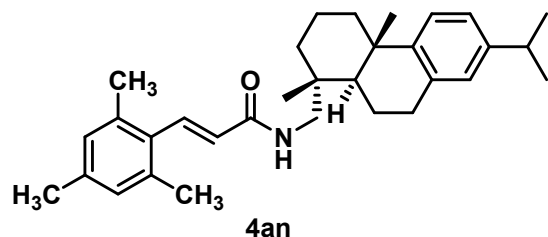

Yield: 83%, 76.0 mg; appearance: yellow oil.

**<sup>1</sup>H NMR (400 MHz, CDCl<sub>3</sub>)** δ 7.77 (d, *J* = 16.0 Hz, 1H), 7.20 (d, *J* = 8.4 Hz, 1H), 7.03 – 7.00 (m, 1H), 6.92 (s, 1H), 6.88 (s, 2H), 6.01 (d, *J* = 15.6 Hz, 1H), 5.72 (t, *J* = 6.0 Hz, 1H), 3.39 – 3.26 (m, 2H), 3.02 – 2.92 (m, 1H), 2.89 – 2.79 (m, 2H), 2.31

(s, 6H), 2.29 (s, 3H), 1.99 – 1.93 (m, 1H), 1.79 – 1.73 (m, 2H), 1.72 – 1.69 (m, 1H), 1.51 – 1.34 (m, 5H), 1.26 (s, 3H), 1.25 (s, 3H), 1.24 (s, 3H), 1.00 (s, 3H).

<sup>13</sup>C NMR (100 MHz, CDCl<sub>3</sub>) δ 166.11, 147.10, 145.58, 139.55, 137.58, 136.55, 134.76, 131.33, 128.91, 126.86, 125.49, 124.11, 123.78, 49.94, 45.25, 38.24, 37.50, 37.39, 36.18, 33.36, 30.13, 26.85, 25.22, 23.92, 21.10, 20.95, 18.90, 18.74, 18.54.

ESI-MS: Calcd for C<sub>32</sub>H<sub>43</sub>NO<sub>3</sub>: [M+H<sup>+</sup>] 458.3417, found 458.3405.

**(E)-3-(2,4-dimethyl-6-(methyl-*d*<sub>3</sub>)phenyl)-N-(((1*R*,4*aS*,10*aR*)-7-isopropyl-1,4*a*-dimethyl-1,2,3,4,4*a*,9,10,10*a*-octahydrophenanthren-1-yl)methyl)acrylamide(4*an-d*<sub>3</sub>)**

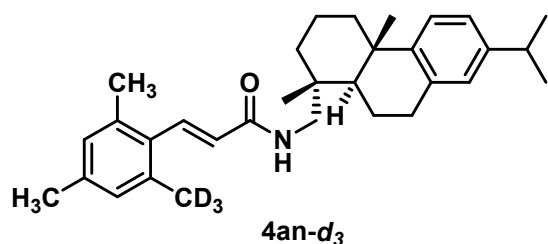

Yield: 79%, 72.8 mg; appearance: yellow oil.

<sup>1</sup>H NMR (400 MHz, CDCl<sub>3</sub>) δ 7.80 (d, *J* = 16.0 Hz, 1H), 7.23 (d, *J* = 8.0 Hz, 1H), 7.07 – 7.04 (m, 1H), 6.95 (s, 1H), 6.90 (s, 2H), 6.13 – 6.05 (m, 2H), 3.42 – 3.27 (m, 2H), 3.01 – 2.84 (m, 3H), 2.34 (s, 3H), 2.31 (s, 3H), 2.01 – 1.95 (m, 1H), 1.84 – 1.68 (m, 3H), 1.56 – 1.49 (m, 2H), 1.48 – 1.38 (m, 2H), 1.30 – 1.27 (m, 10H), 1.01 (s, 3H).

<sup>13</sup>C NMR (100 MHz, CDCl<sub>3</sub>) δ 166.18, 147.03, 145.40, 139.19, 137.38, 136.44, 136.32, 134.69, 131.28, 128.83, 126.76, 125.53, 124.02, 123.65, 49.90, 45.15, 38.14, 37.44, 37.29, 36.08, 33.28, 30.06, 25.16, 23.88, 21.02, 20.88, 18.82, 18.61, 18.48.

ESI-MS: Calcd for C<sub>32</sub>H<sub>40</sub>D<sub>3</sub>NO: [M+Na<sup>+</sup>] 483.3425, found 483.3430.

**(3*S*,8*S*,9*S*,10*R*,13*R*,14*S*,17*R*)-10,13-dimethyl-17-((*R*)-6-methylheptan-2-yl)-2,3,4,7,8,9,10,11,12,13,14,15,16,17-tetradecahydro-1*H*-cyclopenta[*a*]phenanthren-3-yl** **(E)-3-(2,4-dimethyl-6-(methyl-*d*<sub>3</sub>)phenyl)acrylate(4*am-d*<sub>3</sub>)**



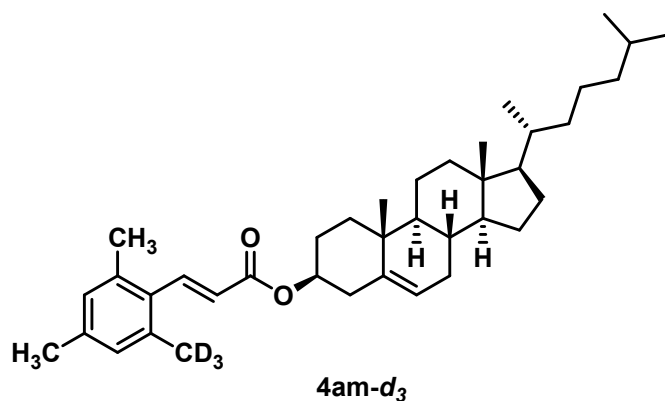

Yield: 87%, 97.8 mg; appearance: yellow solid, M.P.: 117-119 °C.

**<sup>1</sup>H NMR (400 MHz, CDCl<sub>3</sub>)** δ 7.83 (d, *J* = 16.0 Hz, 1H), 6.89 (s, 2H), 6.04 (d, *J* = 16.4 Hz, 1H), 5.41 (d, *J* = 3.6 Hz, 1H), 4.80 – 4.72 (m, 1H), 2.47 – 2.40 (m, 2H), 2.34 (s, 3H), 2.29 (s, 3H), 2.04 – 1.81 (m, 5H), 1.67 – 1.44 (m, 8H), 1.35 – 1.25 (m, 4H), 1.22 – 1.08 (m, 7H), 1.05 (s, 3H), 1.02 – 0.96 (m, 2H), 0.92 (d, *J* = 6.4 Hz, 3H), 0.88 – 0.86 (m, 6H), 0.69 (s, 3H).

**<sup>13</sup>C NMR (100 MHz, CDCl<sub>3</sub>)** δ 166.53, 143.02, 139.78, 138.28, 136.93, 136.81, 131.02, 129.19, 123.50, 122.70, 74.13, 56.72, 56.15, 50.05, 42.35, 39.76, 39.56, 38.28, 37.07, 36.22, 35.84, 31.97, 31.90, 28.29, 28.07, 27.93, 24.34, 23.87, 22.88, 22.62, 21.20, 21.10, 19.41, 18.76, 11.90.

**ESI-MS:** Calcd for C<sub>39</sub>H<sub>55</sub>D<sub>3</sub>O<sub>2</sub>: [M+H<sup>+</sup>] 562.4698, found 562.4696.

**benzo[*d*][1,3]dioxol-5-yl (*E*)-3-(4-methyl-2,6-bis(methyl-*d*<sub>3</sub>)phenyl)acrylate**  
(**4ag-d<sub>6</sub>**)

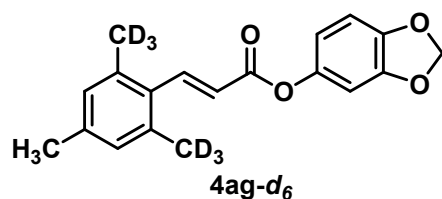

Yield: 76%, 48.1 mg; appearance: colorless oil.

**<sup>1</sup>H NMR (400 MHz, CDCl<sub>3</sub>)** δ 8.05 (d, *J* = 16.0 Hz, 1H), 6.94 (s, 2H), 6.82 (d, *J* = 7.6 Hz, 1H), 6.74 (d, *J* = 2.4 Hz, 1H), 6.65 (dd, *J* = 8.4, 2.4 Hz, 1H), 6.26 (d, *J* = 16.4 Hz, 1H), 6.01 (s, 2H), 2.32 (s, 3H).

**<sup>13</sup>C NMR (100 MHz, CDCl<sub>3</sub>)** δ 165.67, 147.92, 145.23, 145.11, 145.04, 138.78, 136.99, 130.46, 129.29, 121.70, 113.92, 107.90, 103.78, 101.62, 21.03.

**ESI-MS:** Calcd for C<sub>19</sub>H<sub>12</sub>D<sub>6</sub>O<sub>4</sub>: [M+H<sup>+</sup>] 317.1654, found 317.1657.

**ethyl (E)-3-(4,6-dimethylbenzo[d][1,3]dioxol-5-yl)acrylate(4ao)**

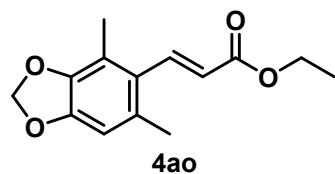

Yield: 76%, 37.7 mg; appearance: yellow oil.

**<sup>1</sup>H NMR (400 MHz, CDCl<sub>3</sub>)** δ 7.76 (d, *J* = 16.4 Hz, 1H), 6.55 (s, 1H), 6.00 (d, *J* = 16.4 Hz, 1H), 5.92 (s, 2H), 4.26 (q, *J* = 7.2 Hz, 2H), 2.29 (s, 3H), 2.23 (s, 3H), 1.33 (t, *J* = 7.2 Hz, 3H).

**<sup>13</sup>C NMR (100 MHz, CDCl<sub>3</sub>)** δ 167.00, 146.72, 144.73, 142.30, 131.52, 127.17, 122.40, 117.99, 108.32, 100.73, 60.38, 21.22, 14.26, 13.23.

**ESI-MS:** Calcd for C<sub>14</sub>H<sub>16</sub>O<sub>4</sub>: [M+H<sup>+</sup>] 249.1121, found 249.1121.

**8-methoxy-5-methyl-6-(methyl-*d*<sub>3</sub>)quinoline(5)**

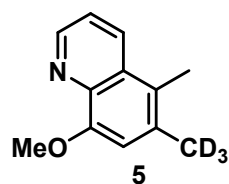

Yield: 78%, 29.7 mg; appearance: yellow solid, M.P.: 88-89 °C.

**<sup>1</sup>H NMR (400 MHz, CDCl<sub>3</sub>)** δ 8.85 (dd, *J* = 4.0, 1.2 Hz, 1H), 8.29 (dd, *J* = 8.4, 1.2 Hz, 1H), 7.41 (dd, *J* = 8.4, 4.0 Hz, 1H), 6.86 (s, 1H), 4.05 (s, 3H), 2.47 (s, 3H).

**<sup>13</sup>C NMR (100 MHz, CDCl<sub>3</sub>)** δ 152.91, 147.62, 139.15, 133.67, 132.01, 128.52, 122.47, 121.17, 110.68, 55.73, 13.51.

**ESI-MS:** Calcd for C<sub>12</sub>H<sub>10</sub>D<sub>3</sub>NO: [M+H<sup>+</sup>] 191.1258, found 191.1258.

***N*,4-dimethyl-*N*-(3,4,5-trimethylphenyl)benzenesulfonamide(6)**

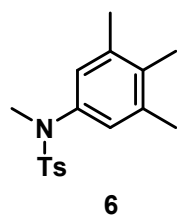

Yield: 65%, 39.4 mg; appearance: red solid, M.P.: 93-95 °C.

**<sup>1</sup>H NMR (400 MHz, CDCl<sub>3</sub>)** δ 7.53 (d, *J* = 8.0 Hz, 2H), 7.29 (d, *J* = 7.6 Hz, 2H),

6.76 (s, 2H), 3.14 (s, 3H), 2.47 (s, 3H), 2.25 (s, 6H), 2.17 (s, 3H).

$^{13}\text{C}$  NMR (100 MHz,  $\text{CDCl}_3$ )  $\delta$  143.26, 138.50, 136.99, 134.51, 134.02, 129.17, 128.00, 125.77, 38.38, 21.52, 20.54, 15.14.

ESI-MS: Calcd for  $\text{C}_{17}\text{H}_{21}\text{NO}_2\text{S}$ :  $[\text{M}+\text{Na}^+]$  326.1185, found 326.1189.

#### 4-(2,3,5-trimethylphenyl)morpholine(7)

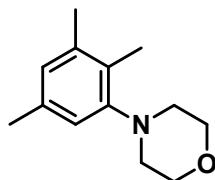

7

Yield: 52%, 21.4 mg; appearance: yellow oil.

$^1\text{H}$  NMR (400 MHz,  $\text{CDCl}_3$ )  $\delta$  6.78 (s, 1H), 6.75 (s, 1H), 3.89 – 3.87 (m, 4H), 2.89 (t,  $J = 4.0$  Hz, 4H), 2.31 (s, 3H), 2.26 (s, 3H), 2.21 (s, 3H).

$^{13}\text{C}$  NMR (100 MHz,  $\text{CDCl}_3$ )  $\delta$  151.20, 137.85, 135.35, 127.89, 125.98, 117.23, 67.44, 52.61, 21.09, 20.53, 13.59.

ESI-MS: Calcd for  $\text{C}_{13}\text{H}_{19}\text{NO}$ :  $[\text{M}+\text{H}^+]$  206.1539, found 206.1536.

#### 6-butyl-8-methoxy-5-methylquinoline(8)

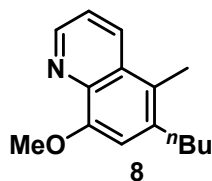

8

Yield: 86%, 39.4 mg; appearance: yellow oil.

$^1\text{H}$  NMR (400 MHz,  $\text{CDCl}_3$ )  $\delta$  8.84 – 8.83 (m, 1H), 8.29 – 8.23 (m, 1H), 7.41 – 7.36 (m, 1H), 6.83 (s, 1H), 4.04 (s, 3H), 2.76 (t,  $J = 8.0$  Hz, 2H), 2.48 (s, 3H), 1.62 – 1.54 (m, 2H), 1.46 – 1.36 (m, 2H), 0.94 (t,  $J = 7.2$  Hz, 3H).

$^{13}\text{C}$  NMR (100 MHz,  $\text{CDCl}_3$ )  $\delta$  153.30, 147.58, 139.14, 138.64, 132.17, 128.71, 121.77, 121.07, 109.97, 55.67, 34.41, 33.16, 22.65, 13.93, 13.18.

ESI-MS: Calcd for  $\text{C}_{15}\text{H}_{19}\text{NO}$ :  $[\text{M}+\text{H}^+]$  230.1539, found 230.1538.

#### ethyl (*E*)-3-(2,6-dimethyl-4-(4-(2-(pyridin-2-yloxy)propoxy)phenoxy)phenyl)acrylate(4ap)

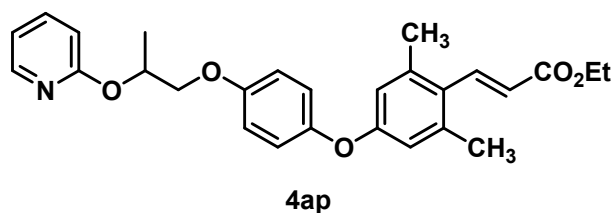

Yield: 50%, 44.8 mg; appearance: yellow oil.

<sup>1</sup>H NMR (400 MHz, CDCl<sub>3</sub>) δ 8.15 (dd, *J* = 5.2, 1.6 Hz, 1H), 7.82 (d, *J* = 16.4 Hz, 1H), 7.59 – 7.54 (m, 1H), 6.99 – 6.92 (m, 4H), 6.88 – 6.84 (m, 1H), 6.75 (d, *J* = 8.4 Hz, 1H), 6.63 (s, 2H), 6.05 (d, *J* = 16.4 Hz, 1H), 5.64 – 5.56 (m, 1H), 4.27 (q, *J* = 7.2 Hz, 2H), 4.20 (dd, *J* = 9.6, 5.2 Hz, 1H), 4.09 (dd, *J* = 10.0, 4.8 Hz, 1H), 2.32 (s, 6H), 1.49 (d, *J* = 6.4 Hz, 3H), 1.34 (t, *J* = 7.2 Hz, 3H).

<sup>13</sup>C NMR (100 MHz, CDCl<sub>3</sub>) δ 167.00, 163.02, 158.29, 155.37, 149.40, 146.66, 142.45, 139.01, 138.66, 127.83, 122.69, 121.13, 116.79, 116.71, 115.68, 111.60, 70.87, 69.17, 60.40, 21.43, 16.93, 14.27.

ESI-MS: Calcd for C<sub>27</sub>H<sub>29</sub>NO<sub>5</sub>: [M+H<sup>+</sup>] 448.2118, found 448.2113.

(3*aS*,4*R*,6*R*,6*aS*)-6-((*R*)-2,2-dimethyl-1,3-dioxolan-4-yl)-2,2-dimethyltetrahydrofuro[3,4-*d*][1,3]dioxol-4-yl (*E*)-3-(2,6-dimethyl-4-(2-(pyridin-2-yloxy)propoxy)phenoxy)phenylacrylate(4aq)

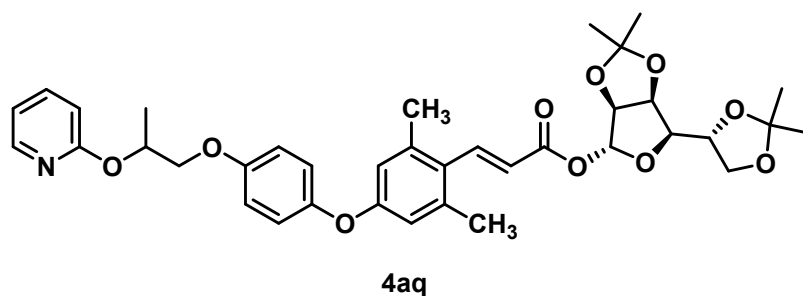

Yield: 50%, 66.2 mg; appearance: yellow oil.

<sup>1</sup>H NMR (400 MHz, CDCl<sub>3</sub>) δ 8.15 – 8.13 (m, 1H), 7.59 – 7.54 (m, 1H), 7.62 – 7.52 (m, 1H), 6.98 – 6.92 (m, 4H), 6.88 – 6.84 (m, 1H), 6.74 (d, *J* = 8.4 Hz, 1H), 6.62 (s, 2H), 6.27 (s, 1H), 6.01 (d, *J* = 16.4 Hz, 1H), 5.63 – 5.55 (m, 1H), 4.90 (dd, *J* = 6.4, 3.6 Hz, 1H), 4.80 (d, *J* = 6.4 Hz, 1H), 4.46 – 4.40 (m, 1H), 4.19 (dd, *J* = 9.6, 5.2 Hz, 1H), 4.14 – 4.06 (m, 4H), 2.33 (s, 6H), 1.51 (s, 3H), 1.48 (d, *J* = 6.4 Hz,

3H), 1.47 (s, 3H), 1.38 (s, 3H), 1.36 (s, 3H).

$^{13}\text{C}$  NMR (100 MHz,  $\text{CDCl}_3$ )  $\delta$  165.34, 163.02, 158.65, 155.45, 149.22, 146.66, 144.13, 139.40, 138.67, 127.28, 121.22, 116.84, 116.72, 115.70, 113.17, 111.61, 109.28, 100.95, 85.10, 82.22, 79.26, 72.87, 70.87, 69.16, 66.79, 26.96, 25.88, 25.06, 24.57, 21.58, 16.93.

ESI-MS: Calcd for  $\text{C}_{37}\text{H}_{43}\text{NO}_{10}$ :  $[\text{M}+\text{H}^+]$  662.2960, found 662.2957.

benzo[*d*][1,3]dioxol-5-yl (*E*)-3-(2,6-bis(methyl- $\text{d}_3$ )-4-(4-(2-(pyridin-2-yloxy)propoxy)phenoxy)phenyl)acrylate(4ar- $\text{d}_6$ )

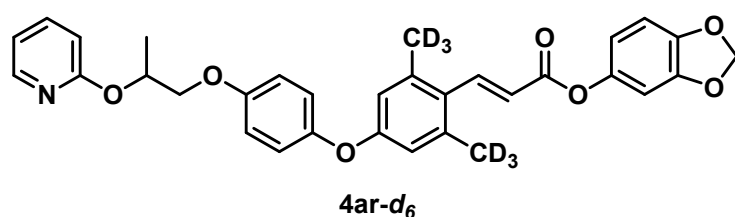

Yield: 48%, 52.4 mg; appearance: yellow oil.

$^1\text{H}$  NMR (400 MHz,  $\text{CDCl}_3$ )  $\delta$  8.16 (dd,  $J = 4.8, 1.6$  Hz, 1H), 8.01 (d,  $J = 16.0$  Hz, 1H), 7.60 – 7.55 (m, 1H), 7.01 – 6.94 (m, 4H), 6.89 – 6.85 (m, 1H), 6.81 (d,  $J = 8.4$  Hz, 1H), 6.76 (d,  $J = 8.0$  Hz, 1H), 6.72 (d,  $J = 2.0$  Hz, 1H), 6.66 (s, 2H), 6.63 (dd,  $J = 8.4, 2.4$  Hz, 1H), 6.23 (d,  $J = 16.4$  Hz, 1H), 6.00 (s, 2H), 5.65 – 5.57 (m, 1H), 4.21 (dd,  $J = 10.0, 5.2$  Hz, 1H), 4.10 (dd,  $J = 9.6, 4.8$  Hz, 1H), 1.50 (d,  $J = 6.4$  Hz, 3H).

$^{13}\text{C}$  NMR (100 MHz,  $\text{CDCl}_3$ )  $\delta$  165.76, 163.03, 158.74, 155.47, 149.23, 147.92, 146.67, 145.23, 145.05, 144.45, 139.38, 138.68, 127.37, 121.25, 121.15, 116.90, 116.73, 115.72, 113.92, 111.61, 107.91, 103.79, 101.63, 70.87, 69.17, 16.94.

ESI-MS: Calcd for  $\text{C}_{32}\text{H}_{23}\text{D}_6\text{NO}_7$ :  $[\text{M}+\text{H}^+]$  546.2393, found 546.2394.

ethyl (*E*)-3-(2'-fluoro-4'-(1-methoxy-1-oxopropan-2-yl)-3,5-dimethyl-[1,1'-biphenyl]-4-yl)acrylate(4as)

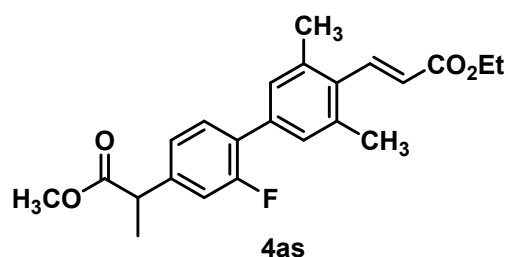



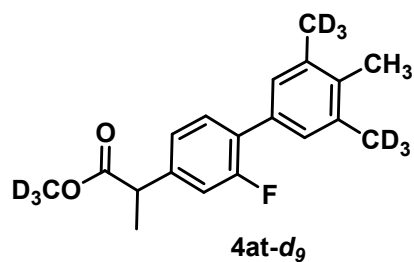

Yield: 80%, 49.5 mg; appearance: yellow oil.

**<sup>1</sup>H NMR (400 MHz, CDCl<sub>3</sub>)** δ 7.41 (t, *J* = 8.4 Hz, 1H), 7.22 (s, 2H), 7.17 – 7.12 (m, 2H), 3.78 (q, *J* = 7.2 Hz, 1H), 2.25 (s, 3H), 1.57 (d, *J* = 7.2 Hz, 3H).

**<sup>13</sup>C NMR (100 MHz, CDCl<sub>3</sub>)** δ 174.46, 159.67 (d, *J* = 246.0 Hz), 141.24 (d, *J* = 8.0 Hz), 136.36, 134.76, 132.32, 130.72 (d, *J* = 4.0 Hz), 128.03 (d, *J* = 1.0 Hz), 127.92, 123.30 (d, *J* = 4.0 Hz), 115.05 (d, *J* = 24.0 Hz), 44.85, 18.37, 15.16.

**<sup>19</sup>F NMR (376 MHz, CDCl<sub>3</sub>)** δ -117.30.

**ESI-MS:** Calcd for C<sub>19</sub>H<sub>12</sub>D<sub>9</sub>FO<sub>2</sub>: [M+Na<sup>+</sup>] 332.1983, found 332.1986.

## References:

- [1] Zhang, Z.; Chen, X.; Li, X.-S.; Wang, C.-T.; Niu, Z.-J.; Zhang, B.-S.; Liu, X.-Y.; Liang, Y.-M. *Ortho* C-H Hydroxyalkylation or Methylation of Aryl Iodides by Ethers and TMSI via a Catellani Strategy. *Org. Lett.* **2022**, *24*, 6897-6902.
- [2] Lemhadri, M.; Fall, Y.; Doucet, H.; Santelli, M. Palladium-Catalysed Heck Reactions of Alk-1-en-3-ones with Aryl Bromides: A Very Simple Access to (*E*)-1-Arylalk-1-en-3-ones. *Synthesis* **2009**, *6*, 1021-1035.
- [3] Gao, Q.; Shang, Y.; Song, F.; Ye, J.; Liu, Z.-S.; Li, L.; Cheng, H.-G.; Zhou, Q. Modular Dual-Tasked C-H Methylation via the Catellani Strategy. *J. Am. Chem. Soc.* **2019**, *141*, 15986-15993.
- [4] Fuson, R. C.; Thomas, N. Extension of the Reformatsky Reaction to New Types of Compounds. *J. Org. Chem.* **1953**, *18*, 1762-1766.
- [5] Liang, X.; Xiong, M.; Zhu, H.; Shen, K.; Pan, Y. Aerobic Copper-Catalyzed Synthesis of (*E*)-Vinyl Sulfones by Direct C-S Bond Oxidative Coupling. *J. Org. Chem.* **2019**, *84*, 11210-11218.
- [6] Wang, L.; Yang, Z.; Zhu, H.; Liu, H.; Lv, S.; Xu, Y. TEMPO and Silver-Mediated Intermolecular Phosphonylation of Alkenes: Stereoselective Synthesis of (*E*)-Alkenylphosphonates. *Eur. J. Org. Chem.* **2019**, *2019*, 2138-2142.
- [7] Sai, M. Direct Reduction of Allylic Alcohols Using Isopropanol as Reductant. *Adv. Synth. Catal.* **2018**, *360*, 3482-3487.



## X-ray Date:

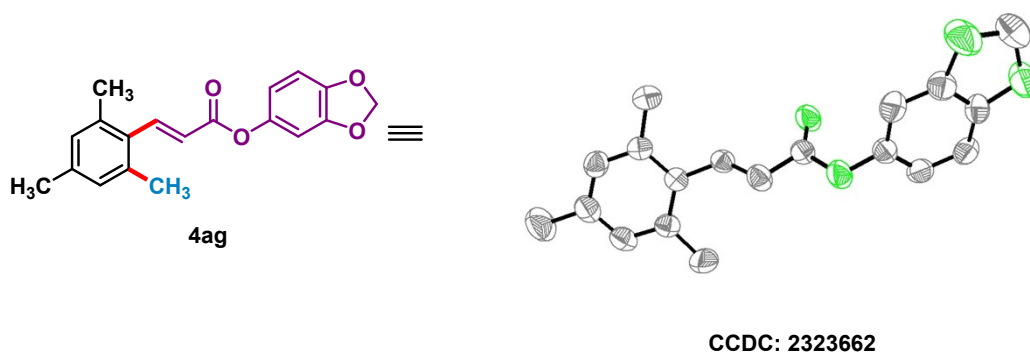

**Figure S1.** ORTEP drawing for the product **4ag**.

N240104A

Table 1 Crystal data and structure refinement for N240104A.

Identification code N240104A

Empirical formula C<sub>19</sub>H<sub>18</sub>O<sub>4</sub>

Formula weight 310.33

Temperature/K 296.15

Crystal system monoclinic

Space group P2<sub>1</sub>/c

a/Å 13.6705(14)

b/Å 7.2456(7)

c/Å 16.9158(17)

$\alpha$ /° 90

$\beta$ /° 105.335(2)

$\gamma$ /° 90

Volume/Å<sup>3</sup> 1615.9(3)

Z 4

$\rho_{\text{calc}}/\text{cm}^3$  1.276

$\mu/\text{mm}^{-1}$  0.089

F(000) 656.0

Crystal size/mm<sup>3</sup> 0.22 × 0.21 × 0.18

Radiation MoK $\alpha$  ( $\lambda = 0.71073$ )

2 $\Theta$  range for data collection/° 4.994 to 50.016

Index ranges  $-15 \leq h \leq 16$ ,  $-8 \leq k \leq 8$ ,  $-20 \leq l \leq 20$

Reflections collected 8941

Independent reflections 2836 [Rint = 0.0180, Rsigma = 0.0180]

Data/restraints/parameters 2836/0/208

Goodness-of-fit on F2 1.054

Final R indexes [ $I \geq 2\sigma(I)$ ] R1 = 0.0399, wR2 = 0.1088

Final R indexes [all data] R1 = 0.0489, wR2 = 0.1172

Largest diff. peak/hole / e  $\text{\AA}^{-3}$  0.16/-0.15

Table 2 Fractional Atomic Coordinates ( $\times 10^4$ ) and Equivalent Isotropic Displacement Parameters ( $\text{\AA}^2 \times 10^3$ ) for N240104A. Ueq is defined as 1/3 of the trace of the orthogonalised UIJ tensor.

| Atom | x           | y          | z          | U(eq)   |
|------|-------------|------------|------------|---------|
| O1   | 7901.5(9)   | 1321.9(17) | 4096.1(7)  | 68.2(4) |
| O2   | 9059.2(9)   | 3155.7(18) | 4917.2(7)  | 68.5(4) |
| O3   | 10024.1(11) | 4470(2)    | 2418.0(9)  | 97.1(5) |
| O4   | 11544.6(10) | 2925.8(19) | 2861.9(8)  | 78.5(4) |
| C1   | 10867.6(16) | 3784(3)    | 2171.5(12) | 80.0(6) |
| C2   | 10108.2(12) | 3749(2)    | 3180.4(10) | 57.1(4) |
| C3   | 11012.1(11) | 2830(2)    | 3447.1(10) | 53.2(4) |
| C4   | 11278.9(12) | 1984(2)    | 4189.6(10) | 58.1(4) |
| C5   | 10595.5(12) | 2081(2)    | 4668.5(10) | 57.4(4) |
| C6   | 9697.0(12)  | 3001(2)    | 4392.2(9)  | 52.5(4) |
| C7   | 9424.9(12)  | 3872(2)    | 3636.5(10) | 58.3(4) |
| C8   | 8138.1(12)  | 2317(2)    | 4682.9(9)  | 51.9(4) |
| C9   | 7530.0(13)  | 2764(2)    | 5247.7(10) | 57.9(4) |
| C10  | 6589.4(11)  | 2155(2)    | 5106.2(9)  | 49.9(4) |
| C11  | 5830.1(11)  | 2433.5(18) | 5568.2(9)  | 45.2(3) |
| C12  | 6073.0(12)  | 2499(2)    | 6431.8(9)  | 52.8(4) |

|     |            |            |            |          |
|-----|------------|------------|------------|----------|
| C13 | 5295.2(14) | 2657(2)    | 6812.8(10) | 61.1(4)  |
| C14 | 4288.4(14) | 2776(2)    | 6378.8(11) | 63.9(4)  |
| C15 | 4067.8(12) | 2752(2)    | 5533.2(11) | 59.5(4)  |
| C16 | 4808.3(11) | 2558.0(18) | 5115.8(9)  | 48.8(4)  |
| C17 | 4502.5(13) | 2526(2)    | 4191.9(9)  | 61.3(4)  |
| C18 | 7144.5(15) | 2361(3)    | 6963.9(10) | 80.2(6)  |
| C19 | 3455.0(18) | 2916(4)    | 6811.7(16) | 104.2(8) |

Table 3 Anisotropic Displacement Parameters ( $\text{\AA}^2 \times 10^3$ ) for N240104A. The Anisotropic displacement factor exponent takes the form:  $-2\pi^2[h^2a^*2U_{11}+2hka^*b^*U_{12}+\dots]$ .

| Atom | U11      | U22       | U33      | U23      | U13      | U12      |
|------|----------|-----------|----------|----------|----------|----------|
| O1   | 64.4(7)  | 83.1(8)   | 62.2(7)  | -22.3(6) | 25.7(6)  | -20.3(6) |
| O2   | 61.4(7)  | 84.0(8)   | 67.5(7)  | -27.3(6) | 29.8(6)  | -23.4(6) |
| O3   | 99.7(10) | 117.0(12) | 84.6(9)  | 53.1(9)  | 42.2(8)  | 32.5(9)  |
| O4   | 69.8(8)  | 89.9(9)   | 89.4(9)  | 21.0(7)  | 45.2(7)  | 4.4(7)   |
| C1   | 96.6(14) | 79.9(12)  | 73.9(12) | 15.7(10) | 40.6(11) | -6.2(11) |
| C2   | 59.0(9)  | 53.5(9)   | 59.6(9)  | 13.7(7)  | 17.0(7)  | 2.4(7)   |
| C3   | 48.3(8)  | 50.2(8)   | 64.6(10) | 3.2(7)   | 20.9(7)  | -6.2(7)  |
| C4   | 43.9(8)  | 61.2(9)   | 65.8(10) | 7.0(8)   | 8.7(7)   | -0.3(7)  |
| C5   | 55.3(9)  | 63.7(10)  | 49.3(8)  | 2.9(7)   | 7.0(7)   | -9.2(7)  |
| C6   | 52.0(9)  | 55.4(9)   | 53.1(8)  | -10.8(7) | 18.8(7)  | -12.8(7) |
| C7   | 48.5(8)  | 56.4(9)   | 70.3(10) | 3.1(8)   | 16.0(7)  | 4.8(7)   |
| C8   | 53.6(9)  | 51.0(8)   | 53.0(9)  | -3.8(7)  | 17.3(7)  | -4.2(7)  |
| C9   | 61.6(10) | 57.1(9)   | 60.1(9)  | -12.5(7) | 25.0(8)  | -8.2(7)  |
| C10  | 55.1(9)  | 48.2(8)   | 47.5(8)  | 2.3(6)   | 15.3(7)  | 1.8(6)   |
| C11  | 50.9(8)  | 38.8(7)   | 47.3(8)  | 0.9(6)   | 15.3(6)  | -1.9(6)  |
| C12  | 57.1(9)  | 53.9(8)   | 47.5(8)  | 0.4(7)   | 14.2(7)  | -2.9(7)  |
| C13  | 71.4(11) | 67.2(10)  | 49.2(9)  | -5.8(7)  | 24.0(8)  | -5.7(8)  |
| C14  | 63.8(10) | 66.2(10)  | 68.5(10) | -13.5(8) | 29.7(9)  | -6.3(8)  |
| C15  | 46.1(8)  | 60.4(9)   | 70.9(10) | -8.3(8)  | 13.8(8)  | -4.1(7)  |

C16 53.5(9) 40.1(7) 51.9(8) -1.8(6) 12.1(7) -4.8(6)  
 C17 63.0(10) 61.6(10) 53.6(9) -0.5(7) 5.6(8) -3.5(8)  
 C18 67.2(11) 122.3(17) 47.2(9) 6.6(10) 8.2(8) 0.3(11)  
 C19 81.4(15) 142(2) 106.0(17) -30.0(16) 54.4(13) -8.8(14)

Table 4 Bond Lengths for N240104A.

| Atom | Atom | Length/Å   | Atom | Atom | Length/Å |
|------|------|------------|------|------|----------|
| O1   | C8   | 1.2001(18) | C8   | C9   | 1.459(2) |
| O2   | C6   | 1.4041(18) | C9   | C10  | 1.320(2) |
| O2   | C8   | 1.3592(19) | C10  | C11  | 1.469(2) |
| O3   | C1   | 1.416(2)   | C11  | C12  | 1.411(2) |
| O3   | C2   | 1.3679(19) | C11  | C16  | 1.407(2) |
| O4   | C1   | 1.427(2)   | C12  | C13  | 1.386(2) |
| O4   | C3   | 1.3769(18) | C12  | C18  | 1.506(2) |
| C2   | C3   | 1.371(2)   | C13  | C14  | 1.381(3) |
| C2   | C7   | 1.363(2)   | C14  | C15  | 1.382(2) |
| C3   | C4   | 1.358(2)   | C14  | C19  | 1.512(2) |
| C4   | C5   | 1.391(2)   | C15  | C16  | 1.386(2) |
| C5   | C6   | 1.367(2)   | C16  | C17  | 1.507(2) |
| C6   | C7   | 1.385(2)   |      |      |          |

Table 5 Bond Angles for N240104A.

| Atom | Atom | Atom | Angle/°    | Atom | Atom | Atom | Angle/°    |
|------|------|------|------------|------|------|------|------------|
| C8   | O2   | C6   | 117.53(12) | O2   | C8   | C9   | 110.75(13) |
| C2   | O3   | C1   | 105.76(14) | C10  | C9   | C8   | 120.24(15) |
| C3   | O4   | C1   | 104.99(13) | C9   | C10  | C11  | 130.49(15) |
| O3   | C1   | O4   | 108.33(14) | C12  | C11  | C10  | 123.34(14) |
| O3   | C2   | C3   | 109.85(14) | C16  | C11  | C10  | 117.33(13) |
| C7   | C2   | O3   | 127.55(15) | C16  | C11  | C12  | 119.27(14) |
| C7   | C2   | C3   | 122.60(14) | C11  | C12  | C18  | 122.81(15) |
| C2   | C3   | O4   | 109.93(14) | C13  | C12  | C11  | 119.01(15) |

|    |    |    |            |     |     |     |            |
|----|----|----|------------|-----|-----|-----|------------|
| C4 | C3 | O4 | 128.61(15) | C13 | C12 | C18 | 118.16(15) |
| C4 | C3 | C2 | 121.46(15) | C14 | C13 | C12 | 122.50(15) |
| C3 | C4 | C5 | 117.29(14) | C13 | C14 | C15 | 117.62(15) |
| C6 | C5 | C4 | 120.45(14) | C13 | C14 | C19 | 121.30(17) |
| C5 | C6 | O2 | 118.35(14) | C15 | C14 | C19 | 121.08(18) |
| C5 | C6 | C7 | 122.38(14) | C14 | C15 | C16 | 122.67(15) |
| C7 | C6 | O2 | 119.16(14) | C11 | C16 | C17 | 121.74(14) |
| C2 | C7 | C6 | 115.82(14) | C15 | C16 | C11 | 118.90(14) |
| O1 | C8 | O2 | 122.42(14) | C15 | C16 | C17 | 119.35(14) |
| O1 | C8 | C9 | 126.81(14) |     |     |     |            |

Table 6 Hydrogen Atom Coordinates ( $\text{\AA}\times 104$ ) and Isotropic Displacement Parameters ( $\text{\AA}^2\times 103$ ) for N240104A.

| Atom | x        | y       | z       | U(eq) |
|------|----------|---------|---------|-------|
| H1A  | 11208.85 | 4786.81 | 1973.13 | 96    |
| H1B  | 10643.94 | 2894.8  | 1732.12 | 96    |
| H4   | 11893.67 | 1365.24 | 4370.61 | 70    |
| H5   | 10750.92 | 1515.61 | 5180.21 | 69    |
| H7   | 8813.96  | 4501    | 3451.98 | 70    |
| H9   | 7806.12  | 3479.57 | 5709.19 | 69    |
| H10  | 6372.13  | 1433.48 | 4637.97 | 60    |
| H13  | 5457.68  | 2682.8  | 7382.44 | 73    |
| H15  | 3395.16  | 2870.29 | 5231.87 | 71    |
| H17A | 4842.12  | 3505.61 | 3988.98 | 92    |
| H17B | 3782.02  | 2689.91 | 3994.88 | 92    |
| H17C | 4690.32  | 1362.51 | 4003.38 | 92    |
| H18A | 7480.2   | 1341.06 | 6785.09 | 120   |
| H18B | 7134.3   | 2171.36 | 7523.29 | 120   |
| H18C | 7501.6   | 3481.96 | 6922.49 | 120   |
| H19A | 3351.22  | 1730.87 | 7029.77 | 156   |

|      |         |         |         |     |
|------|---------|---------|---------|-----|
| H19B | 2838.72 | 3312.07 | 6429.67 | 156 |
| H19C | 3646.32 | 3794.17 | 7250.57 | 156 |

## NMR Spectra:

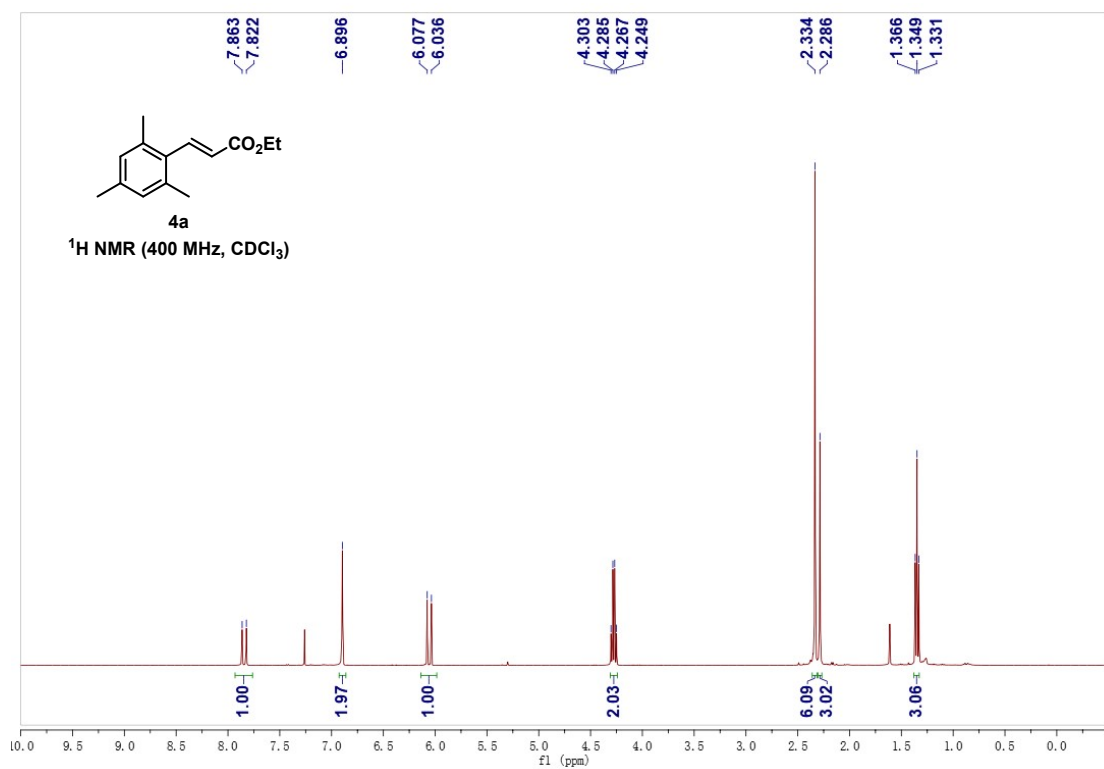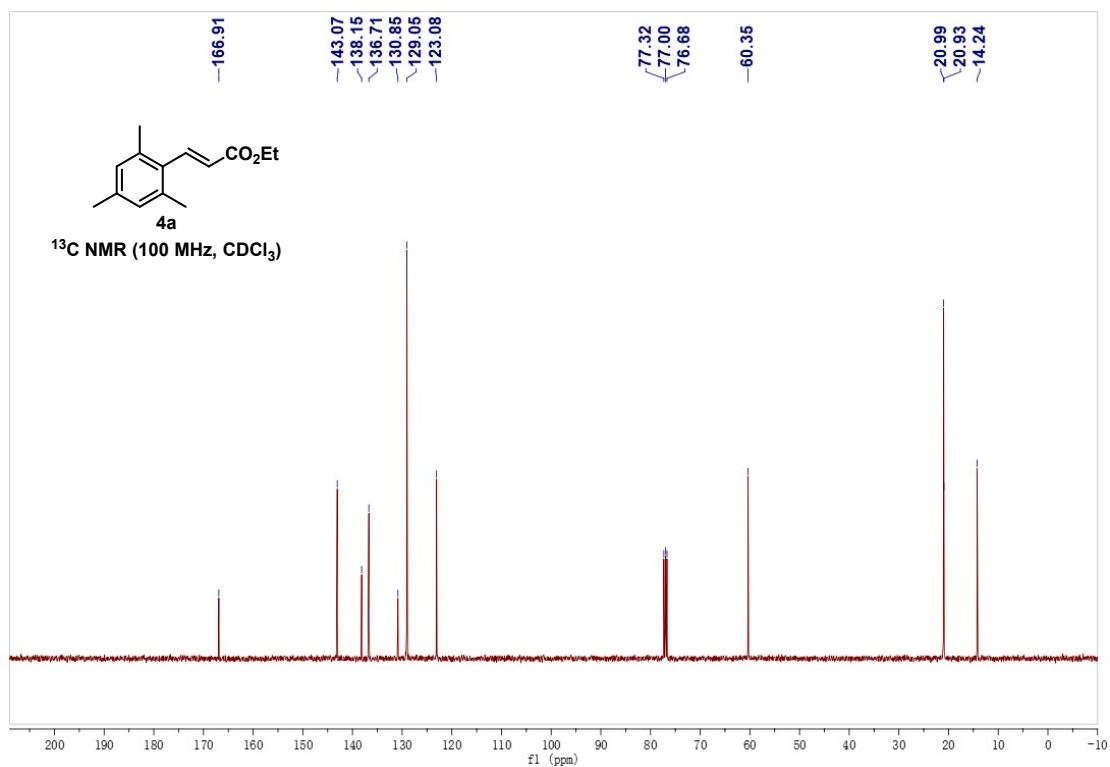

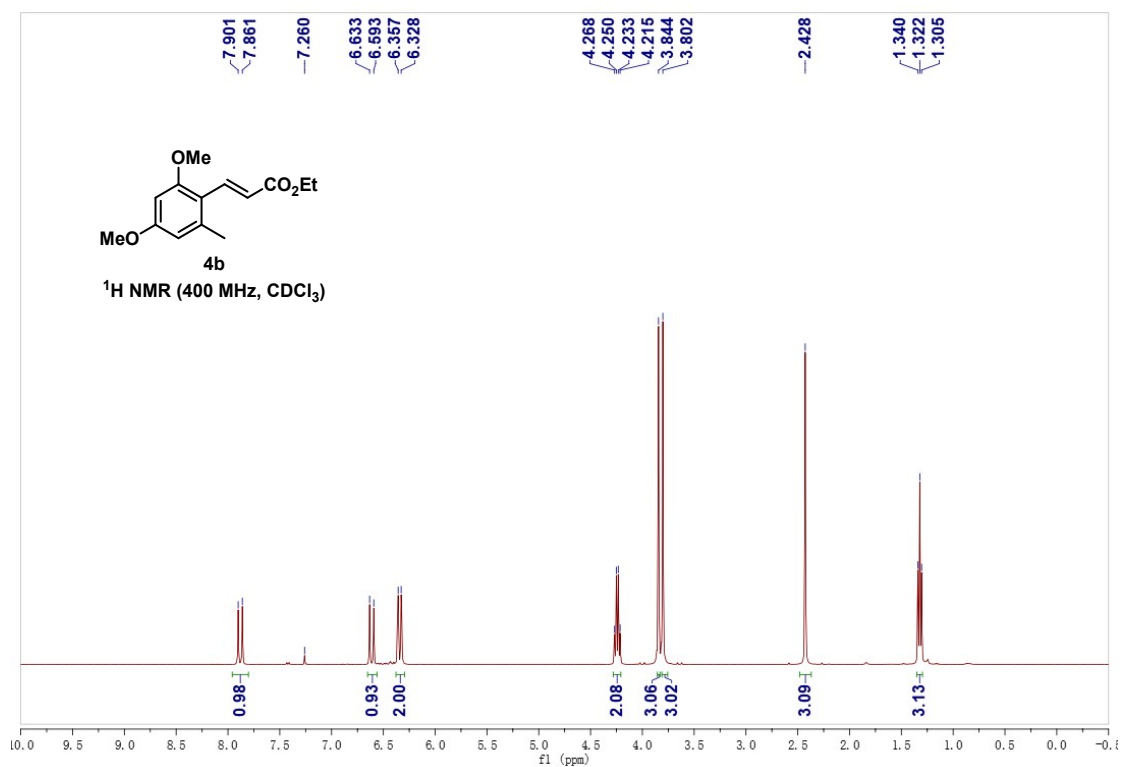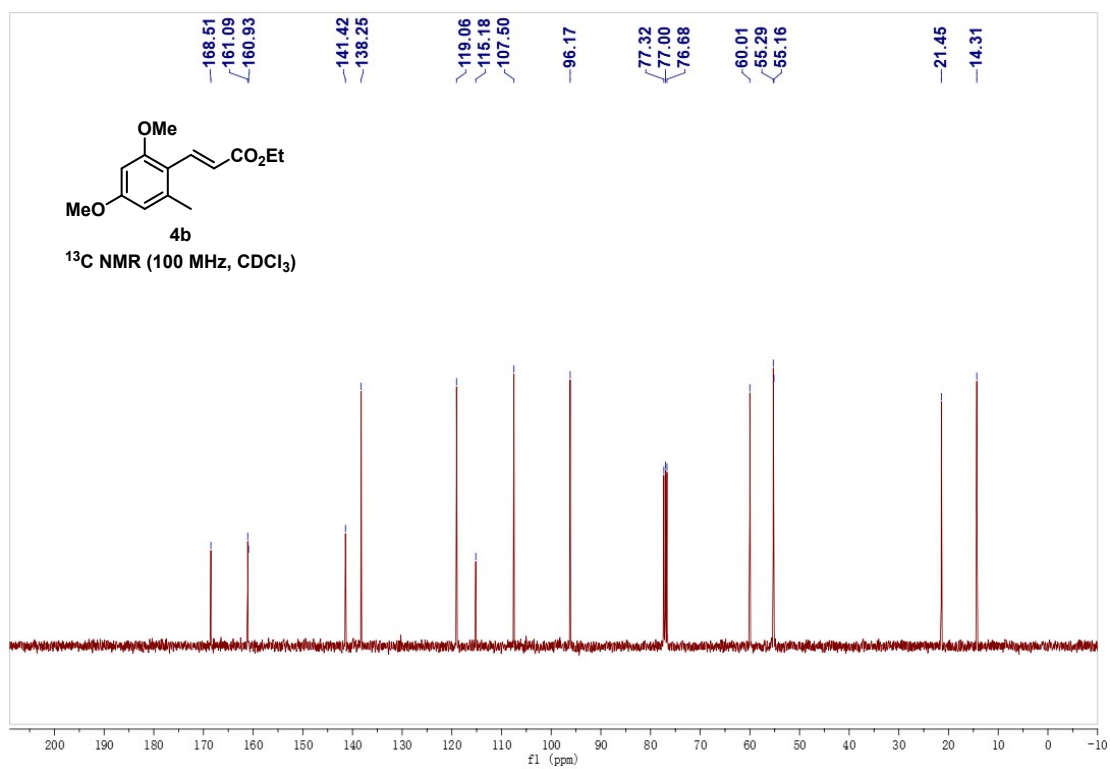



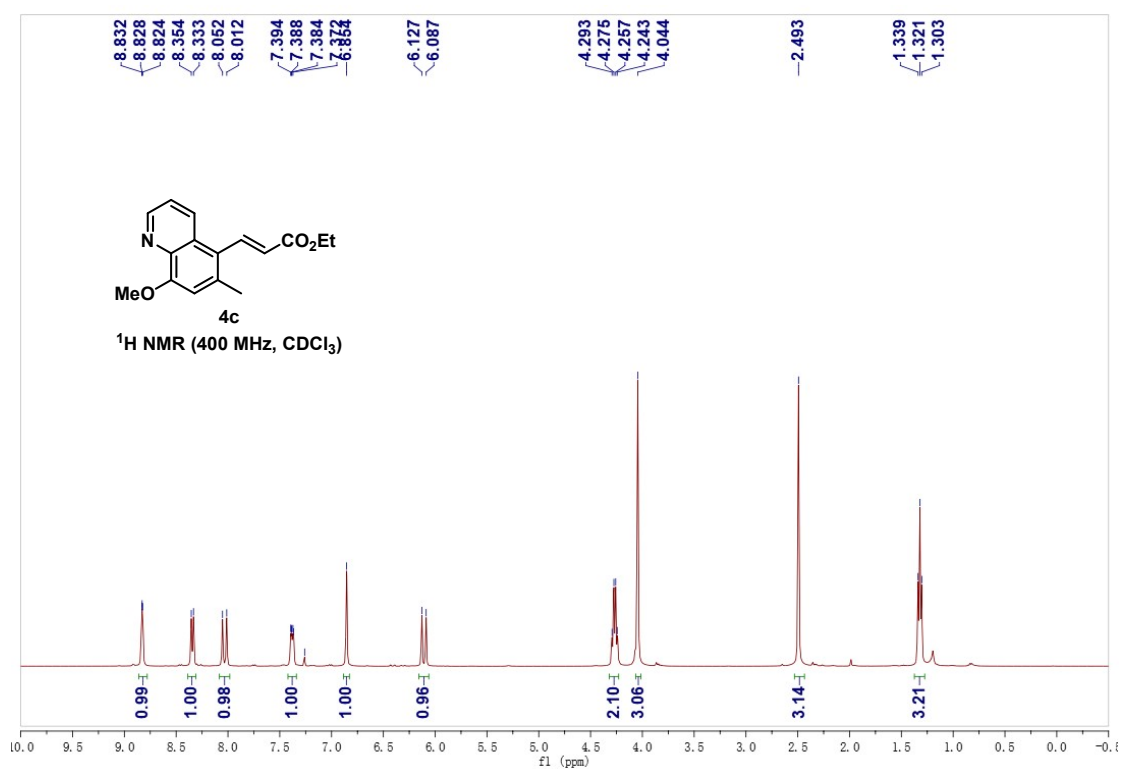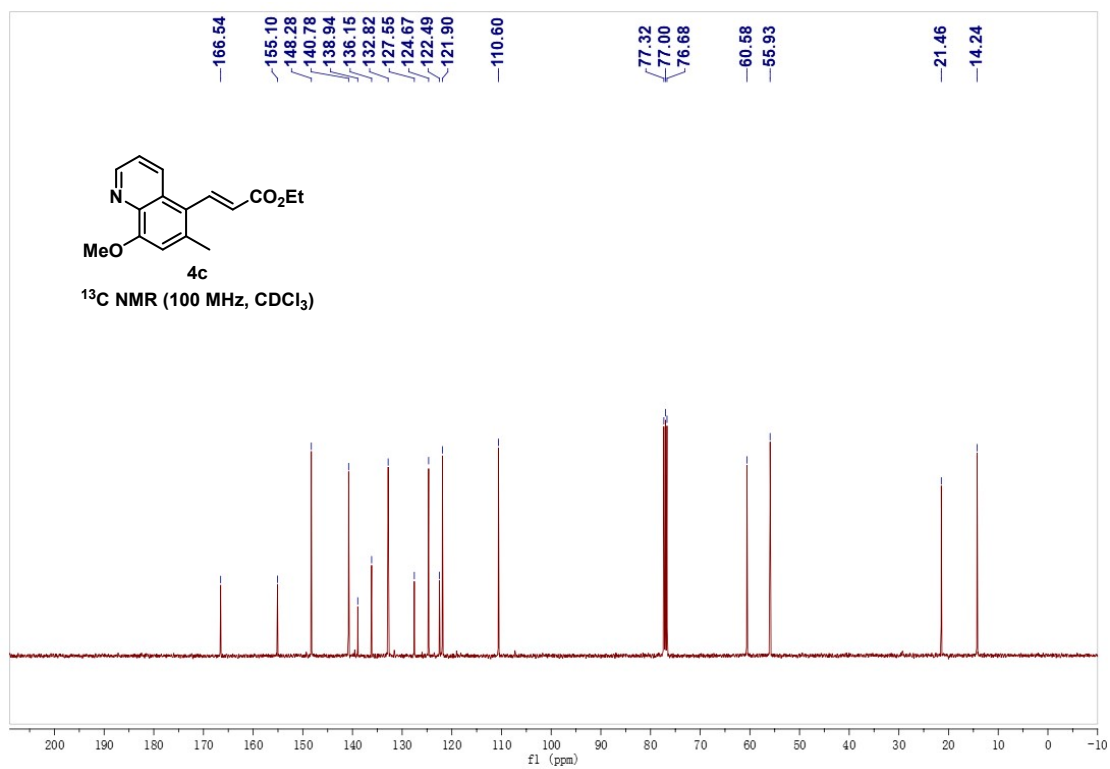

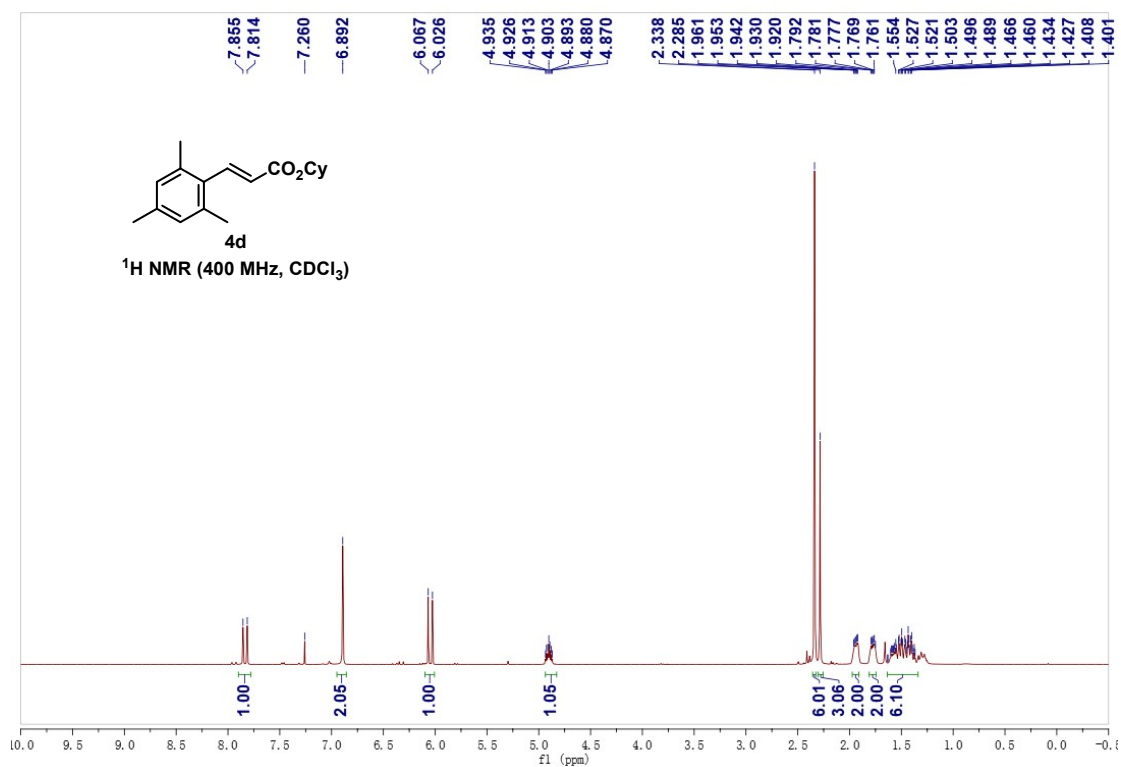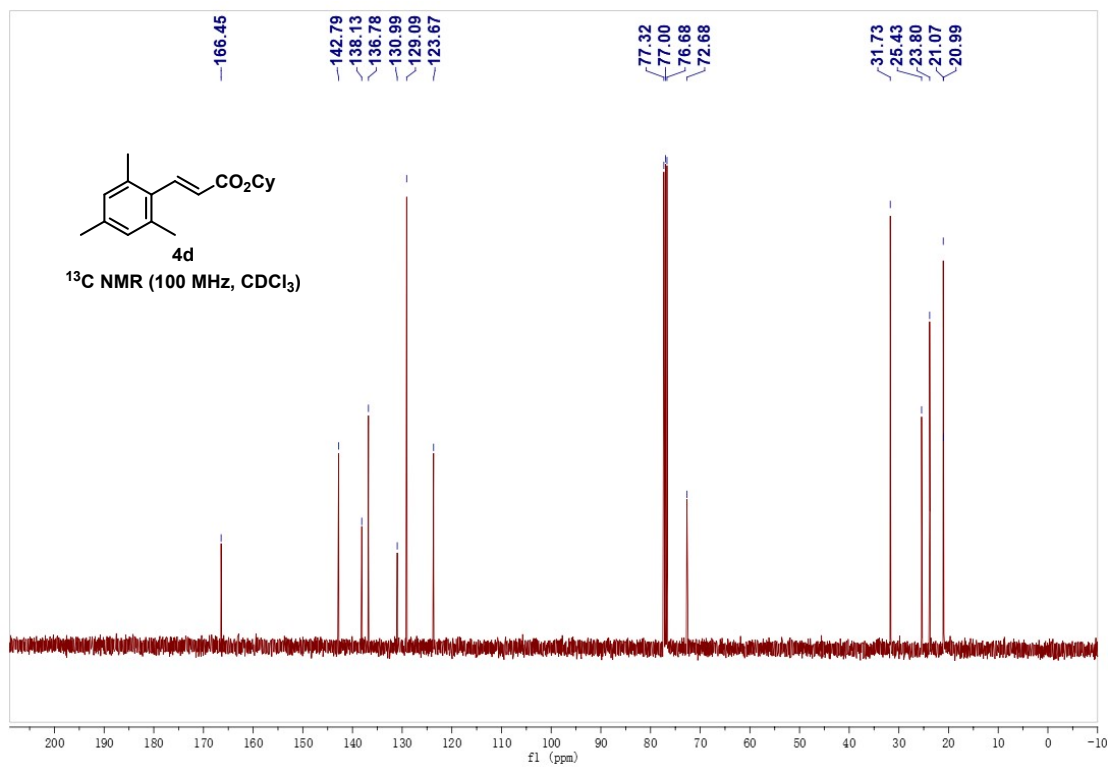

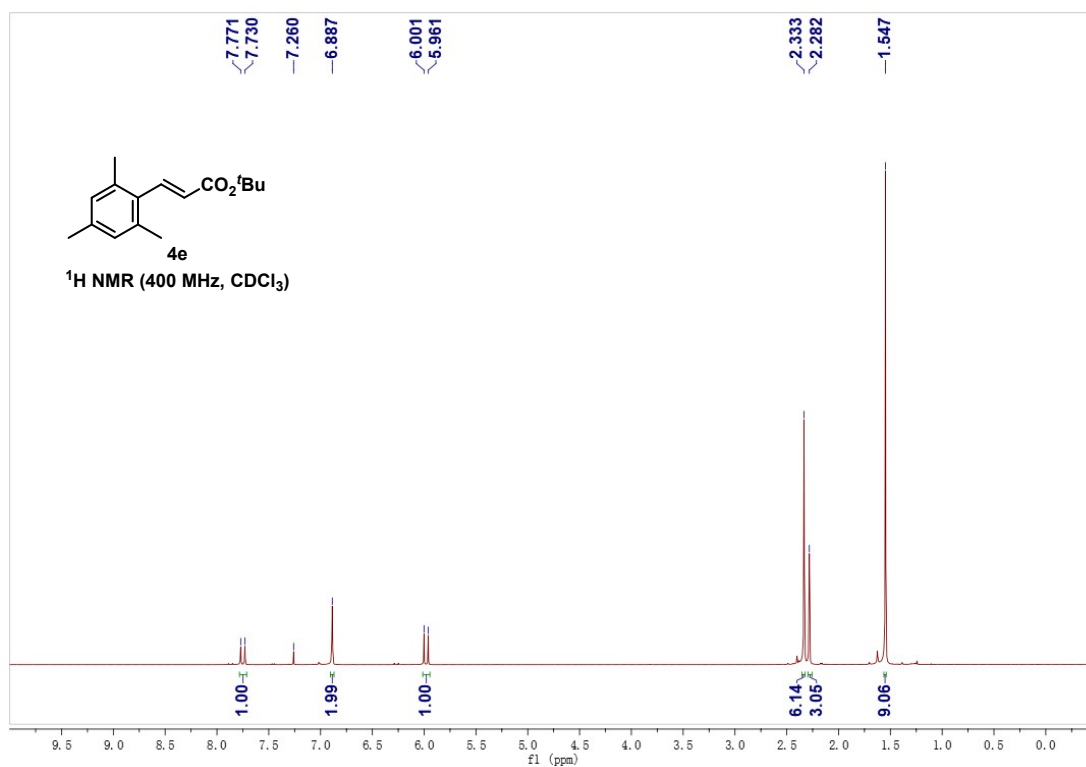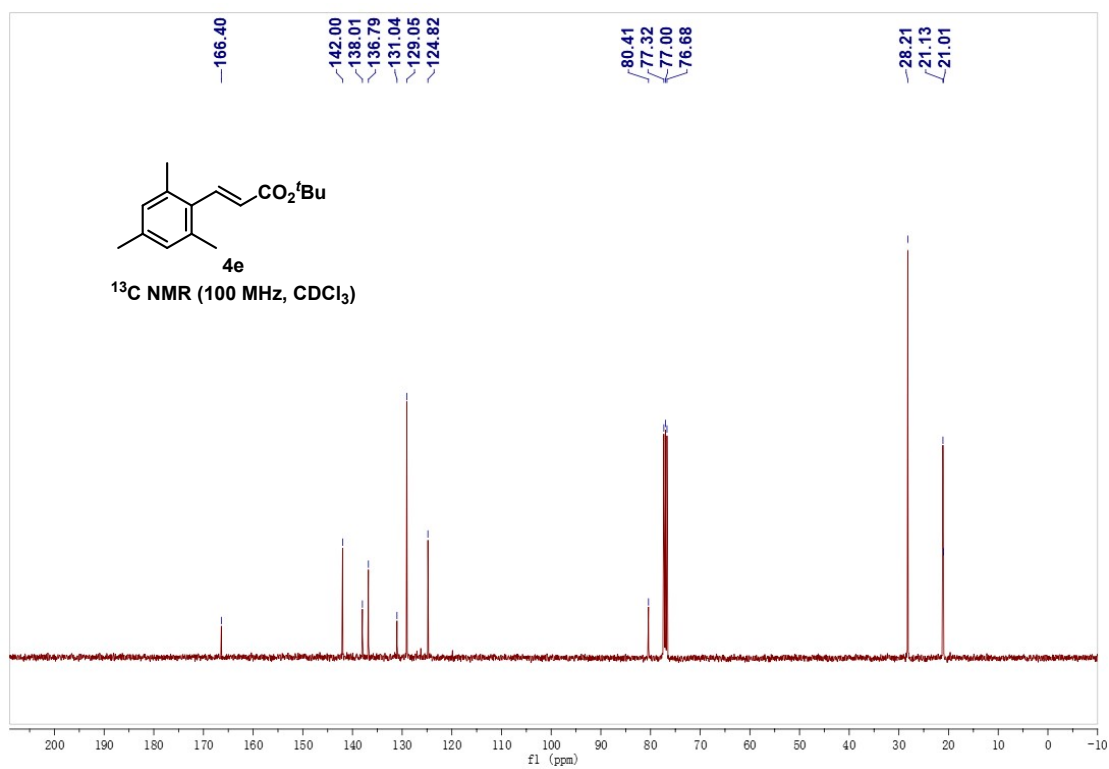

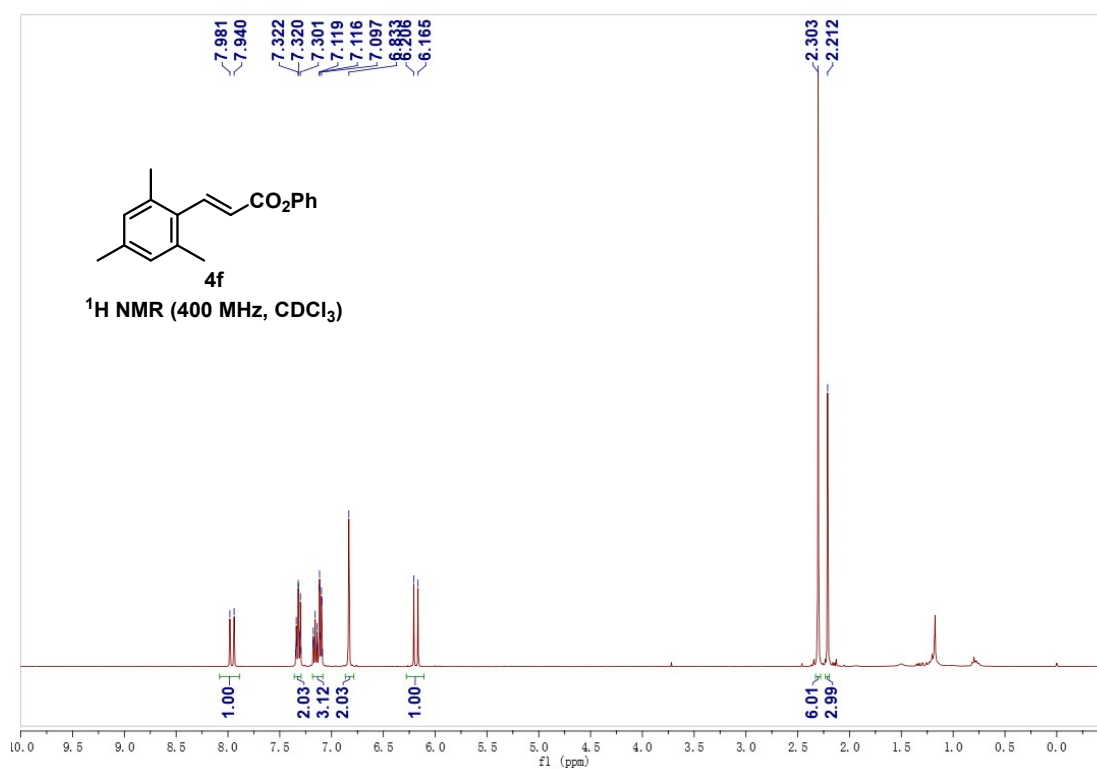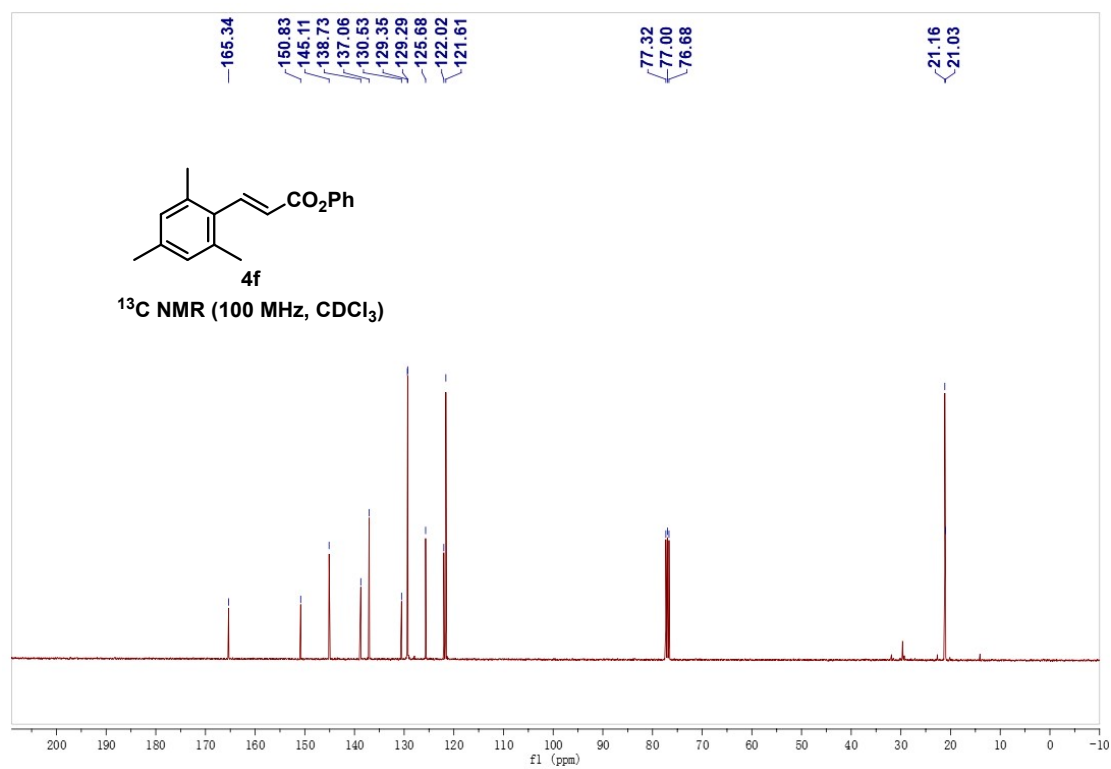

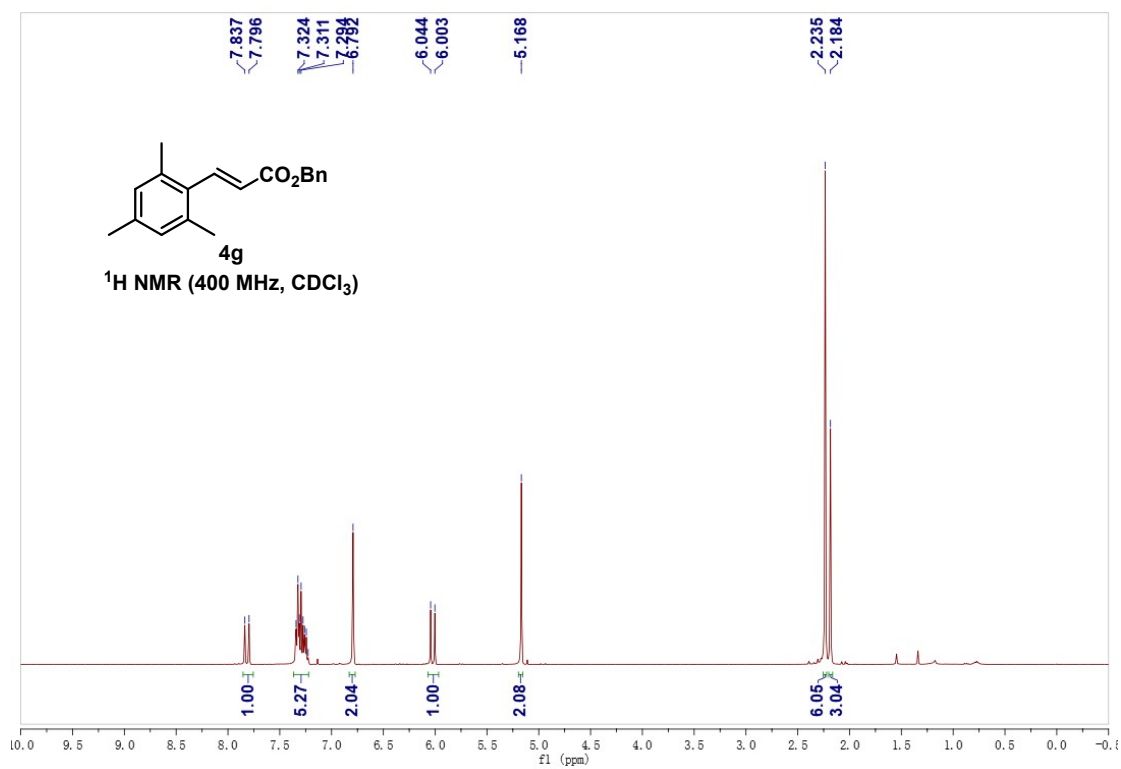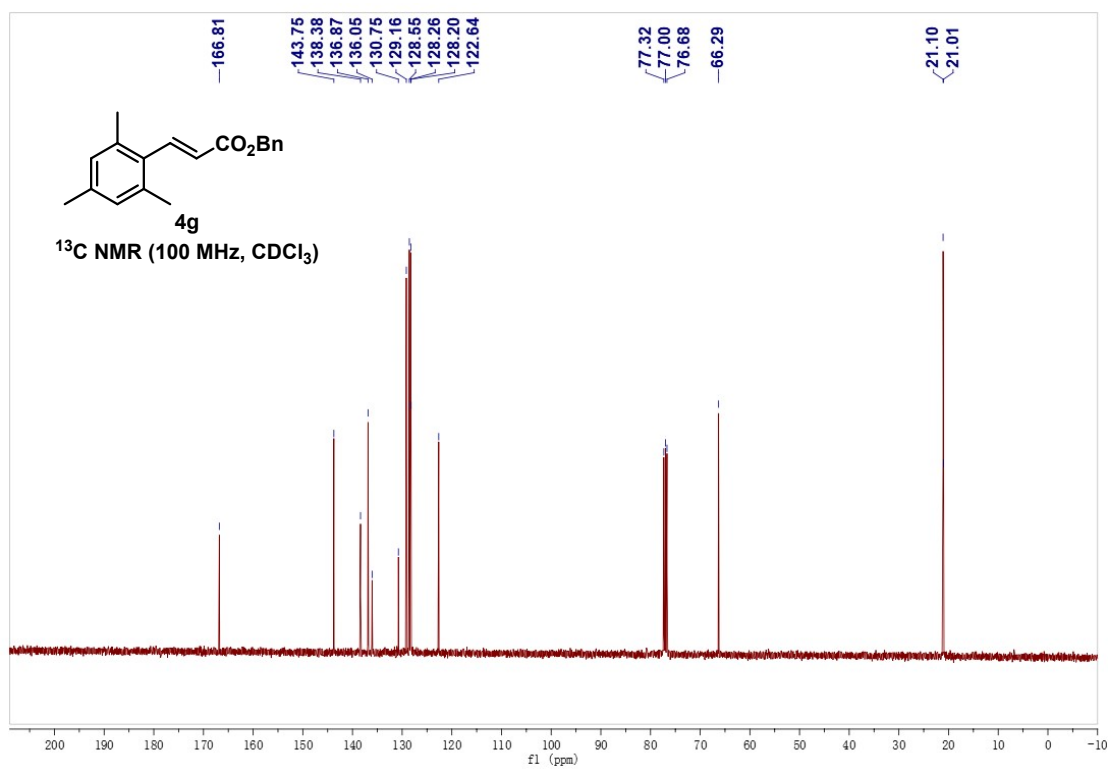

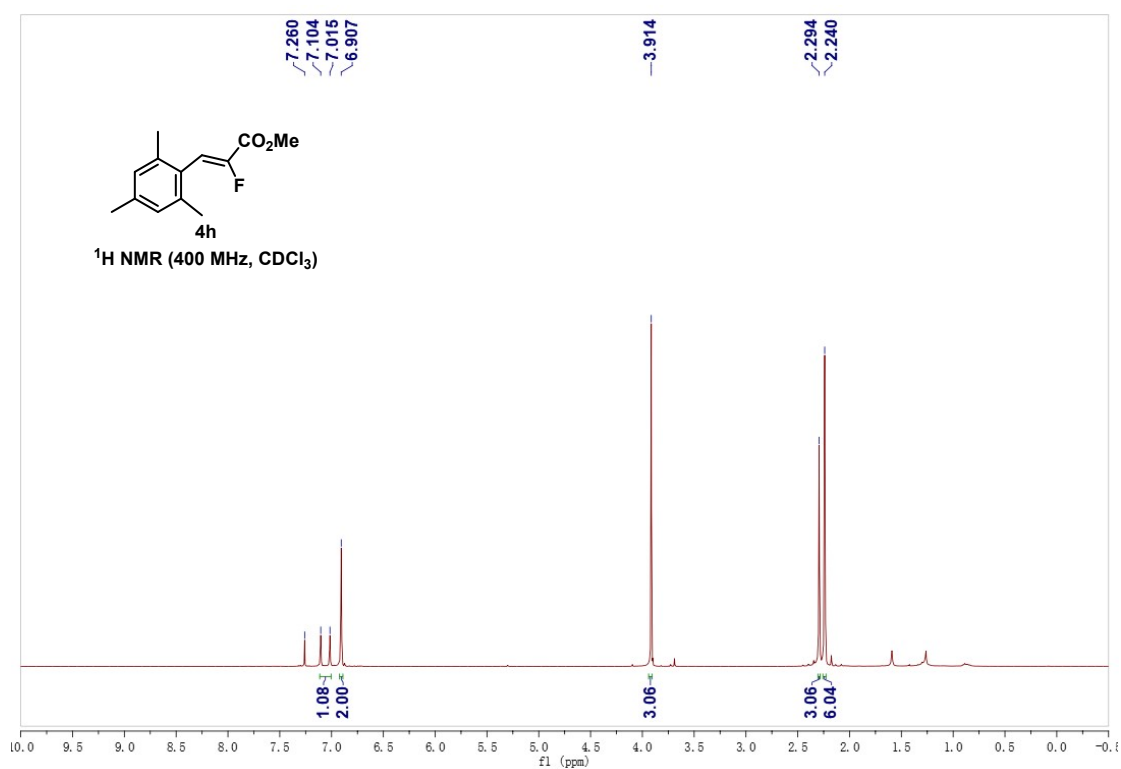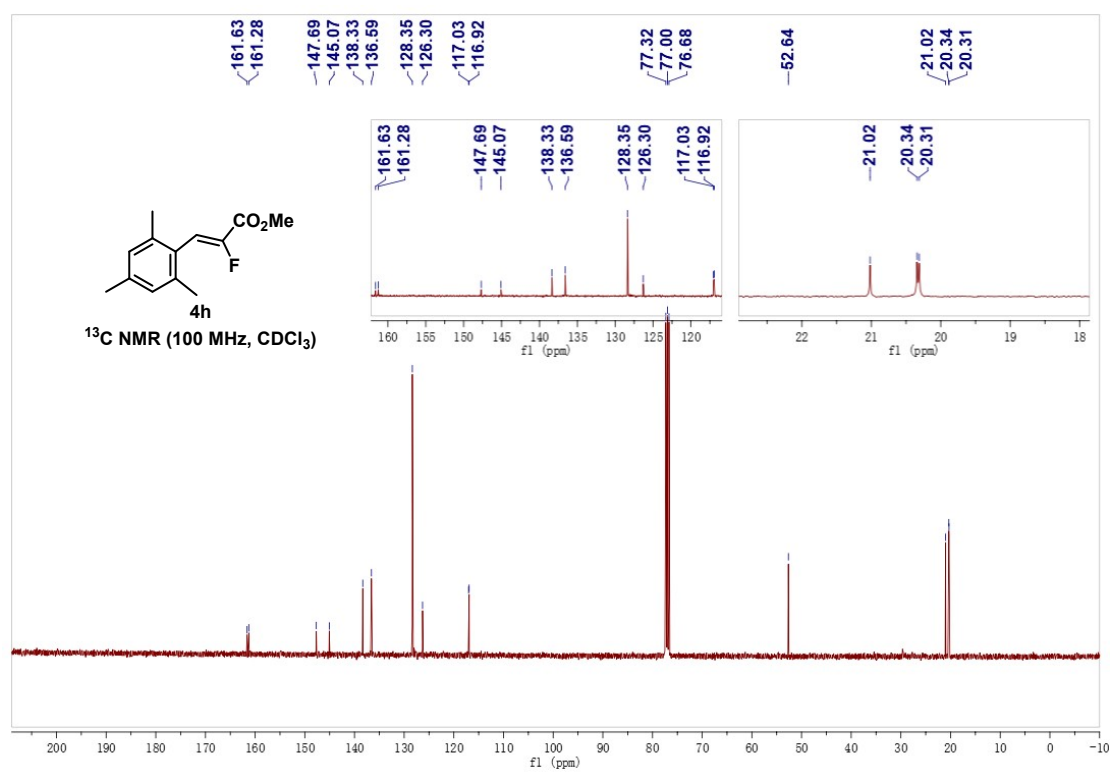

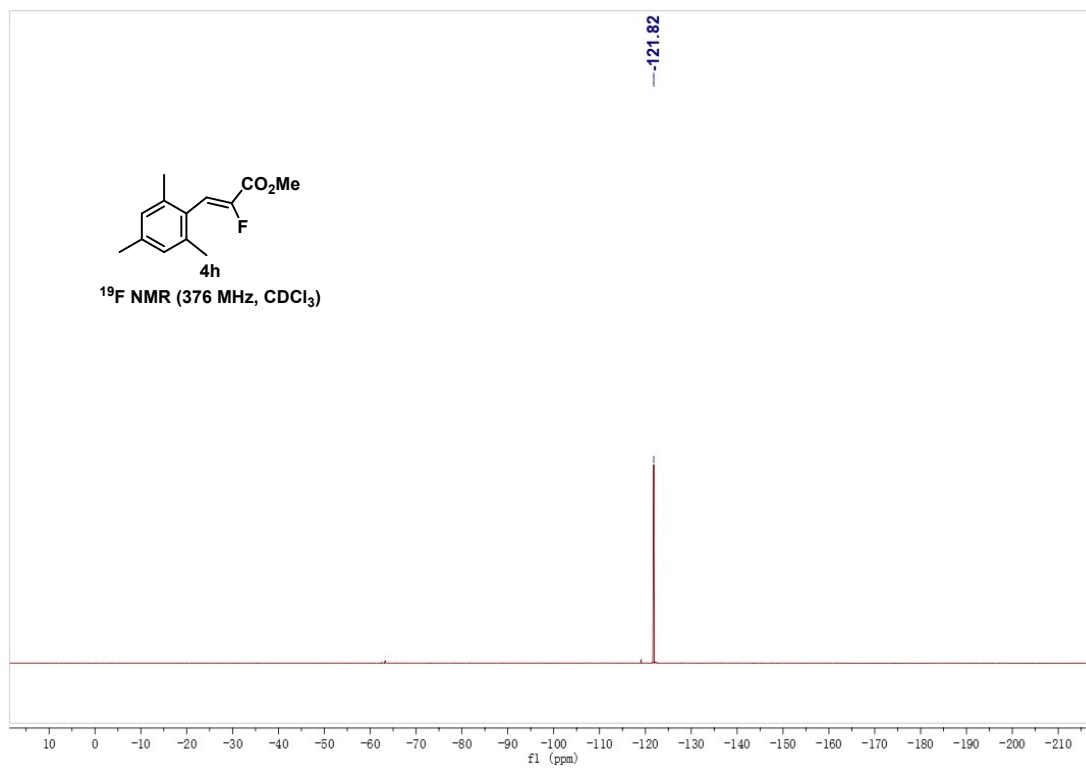

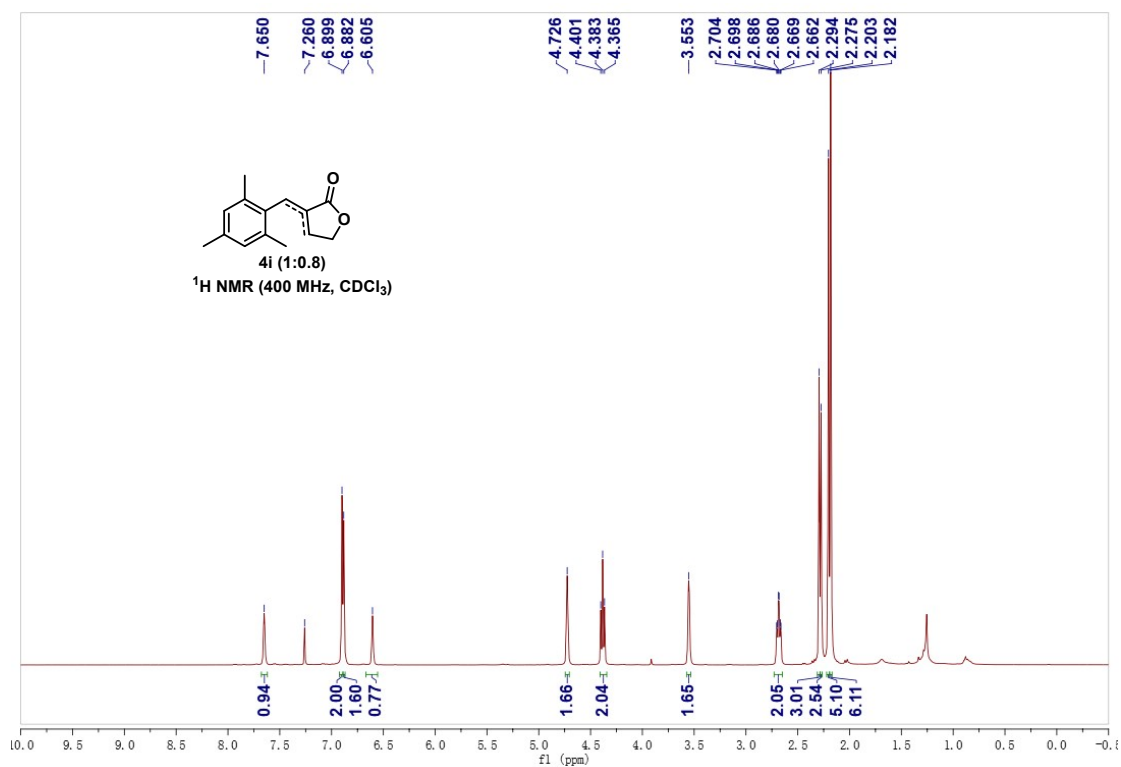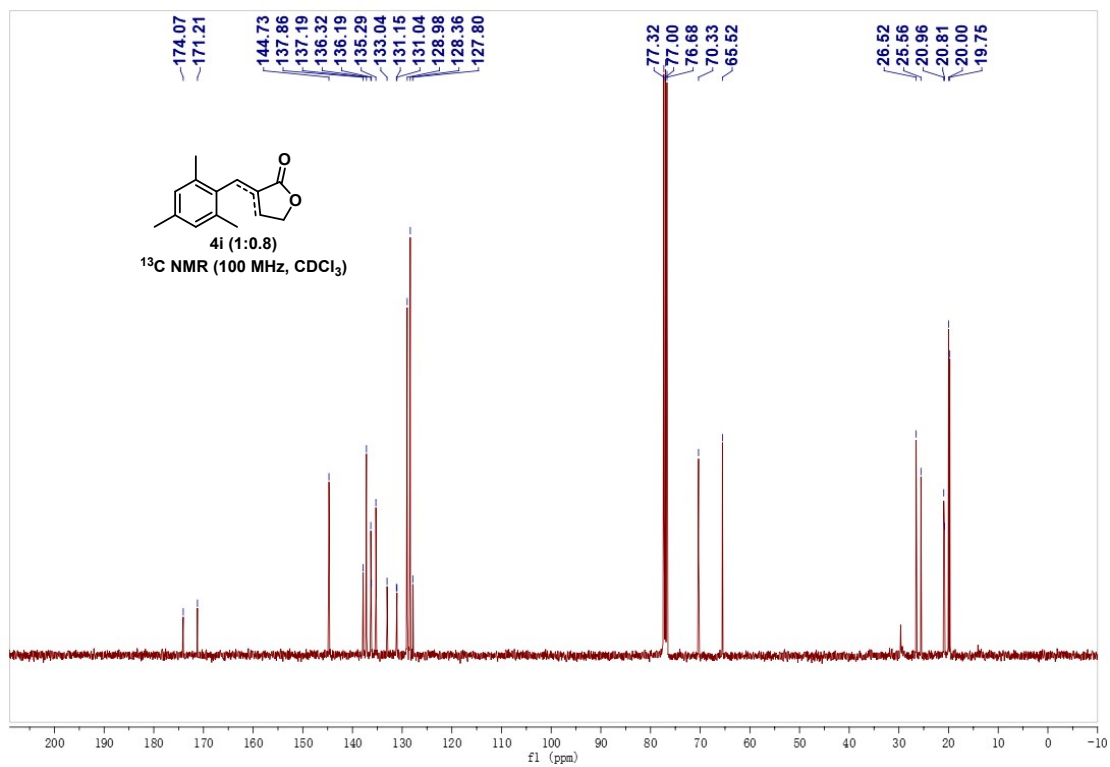



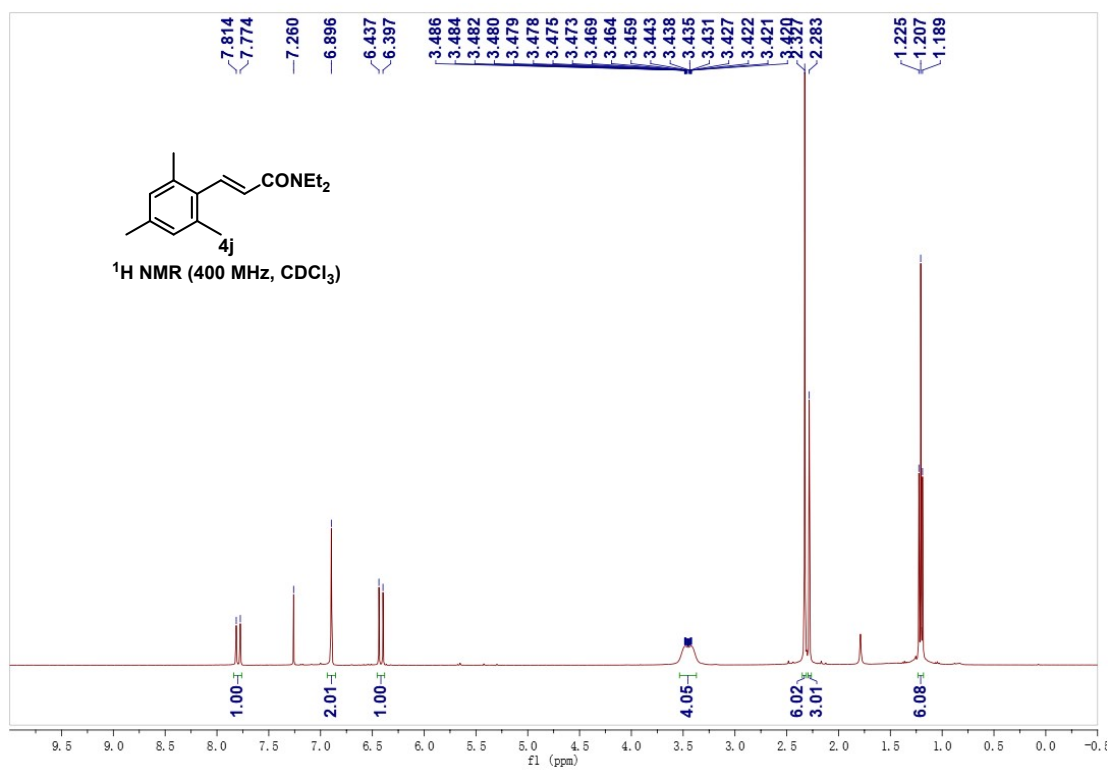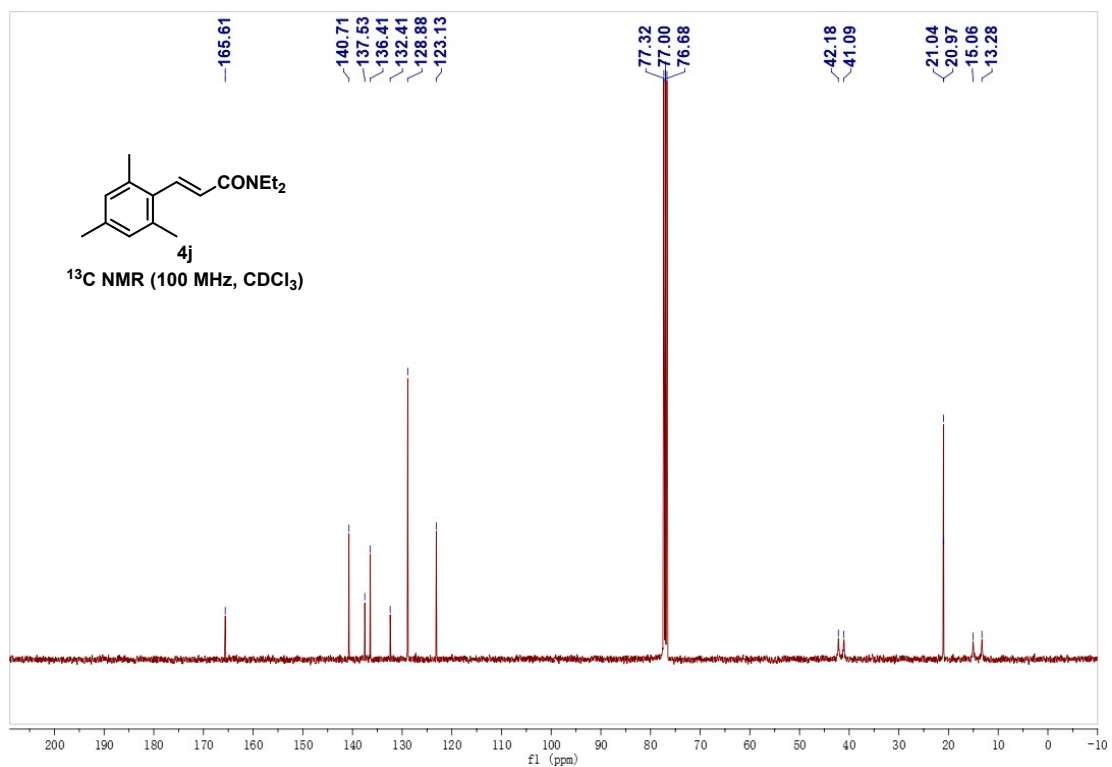

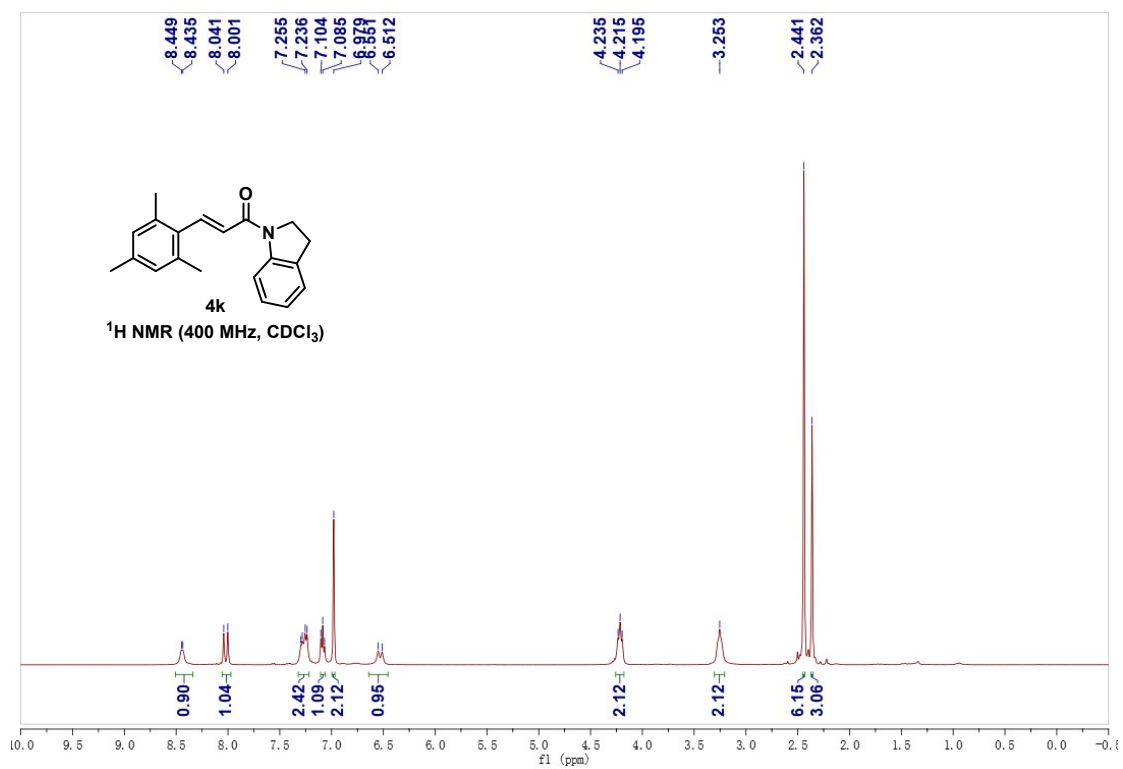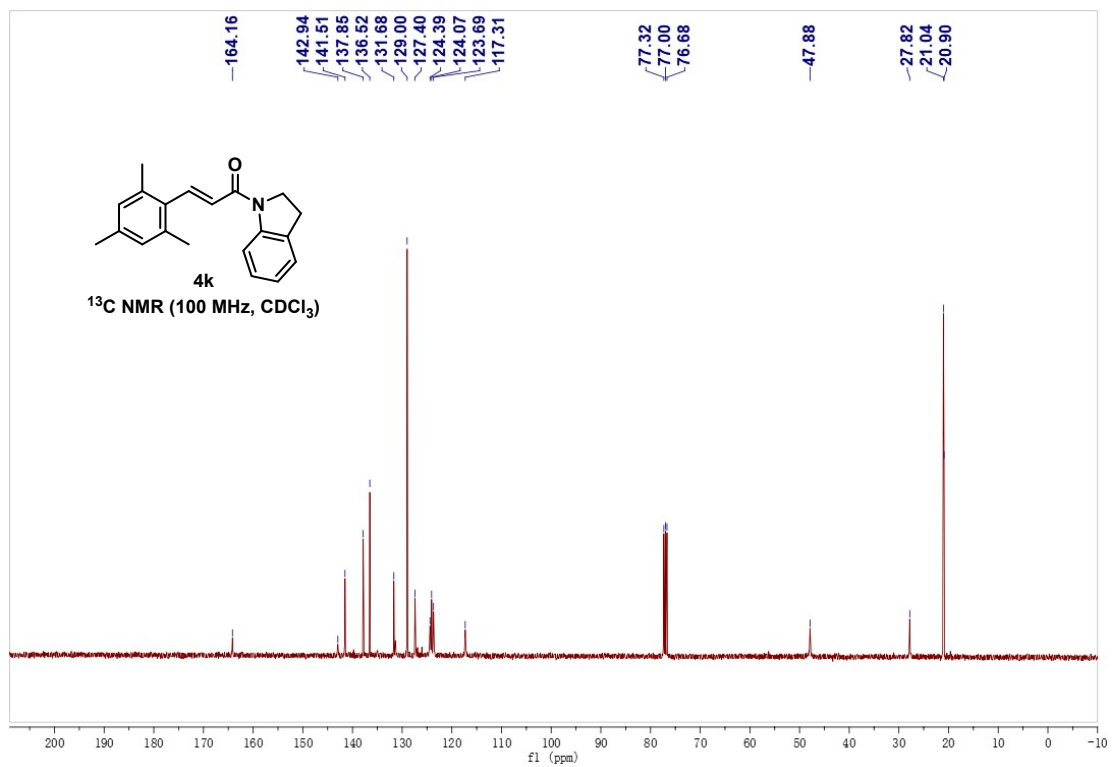

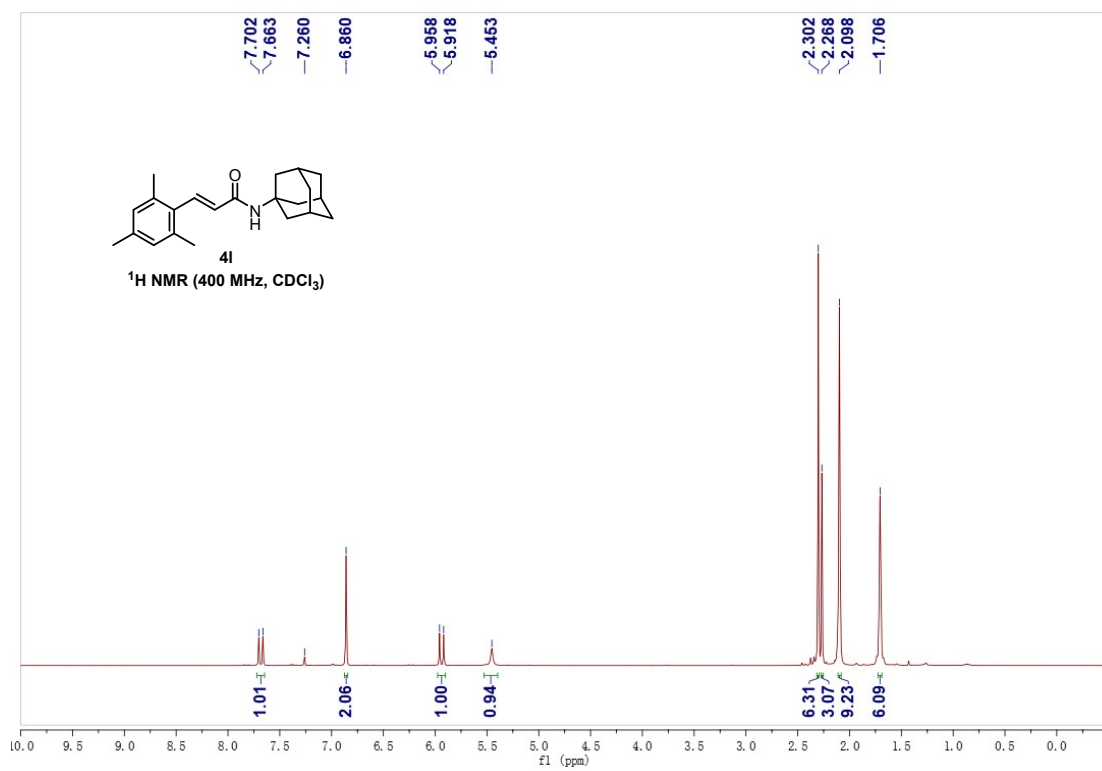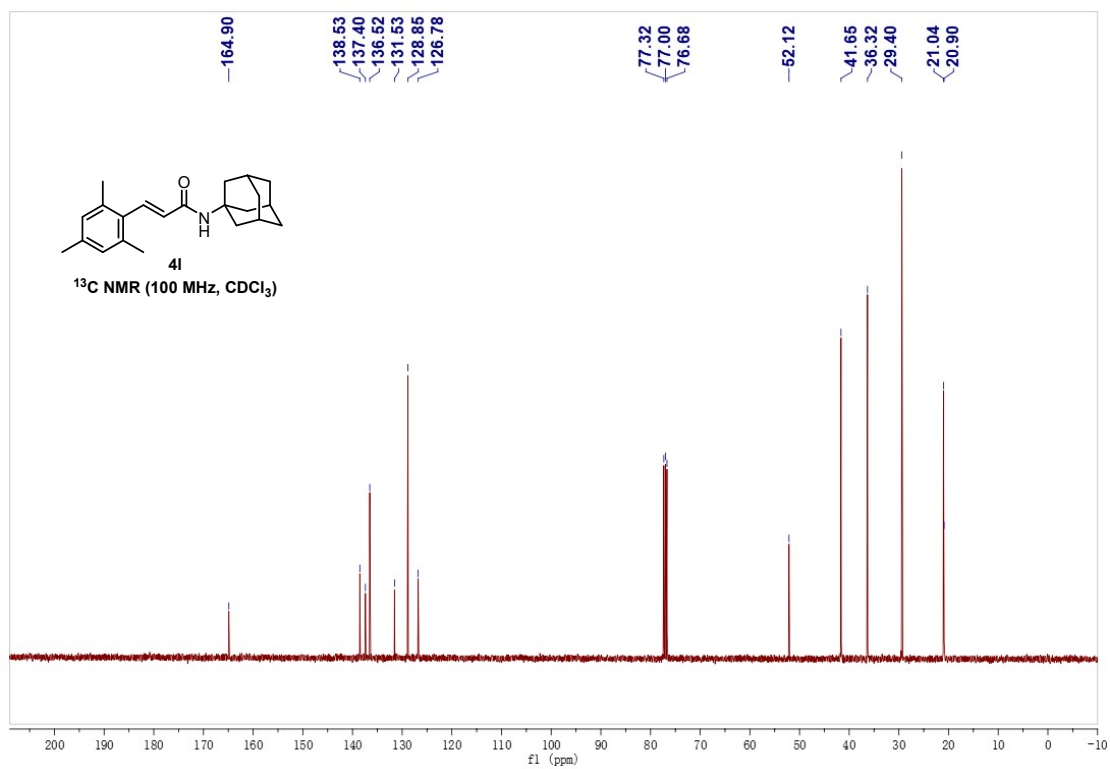

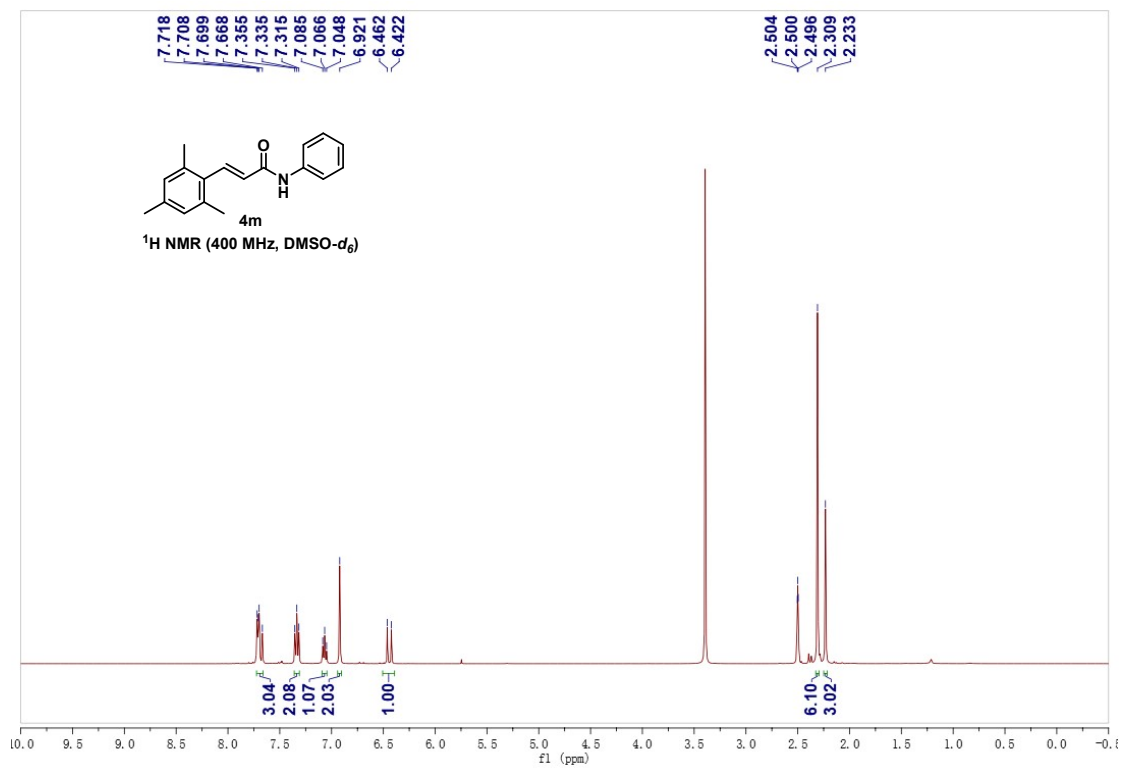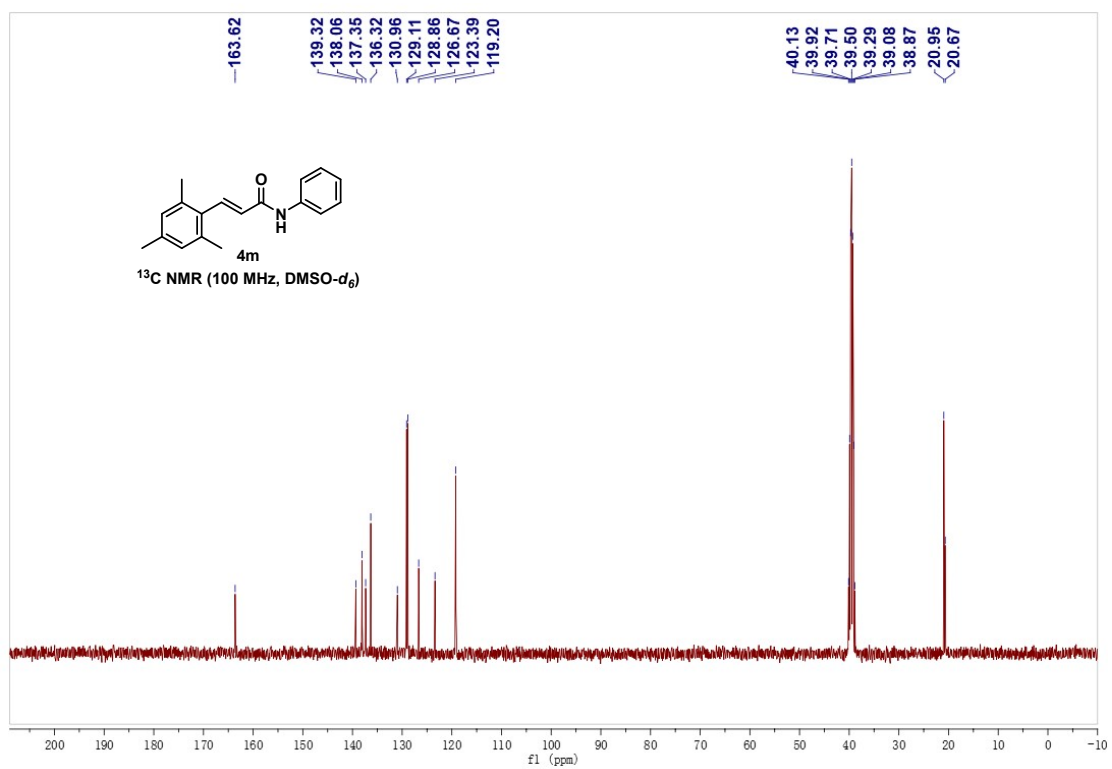

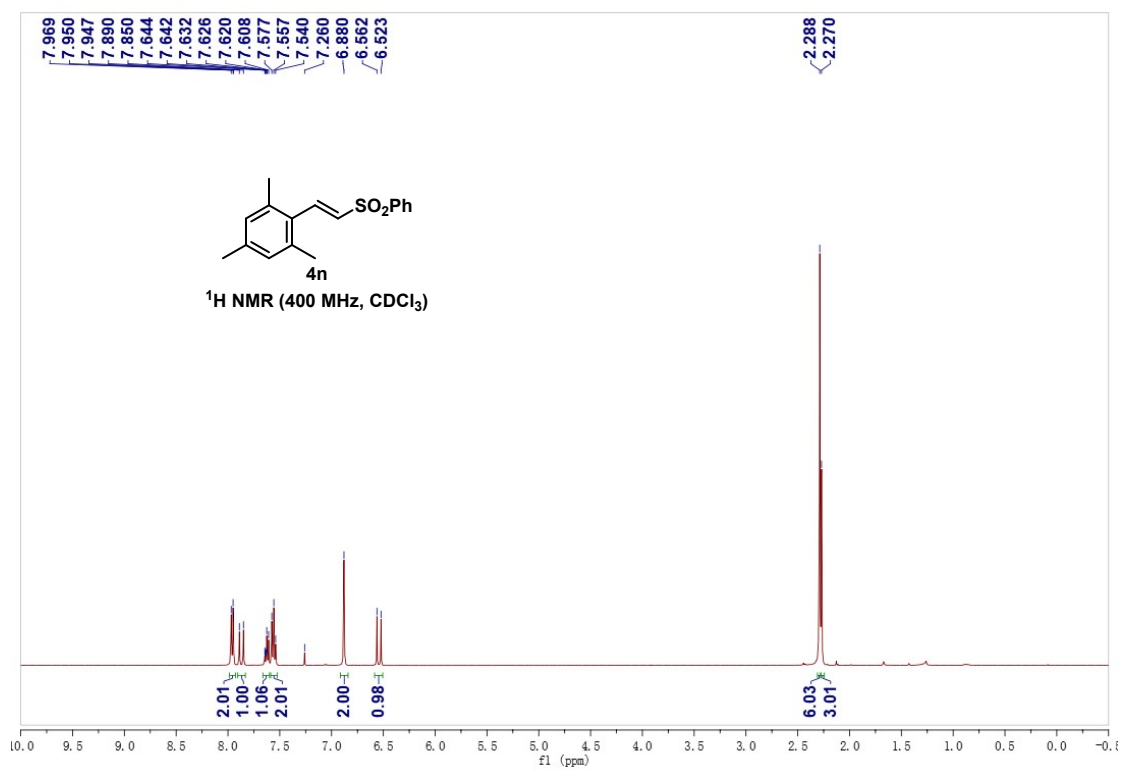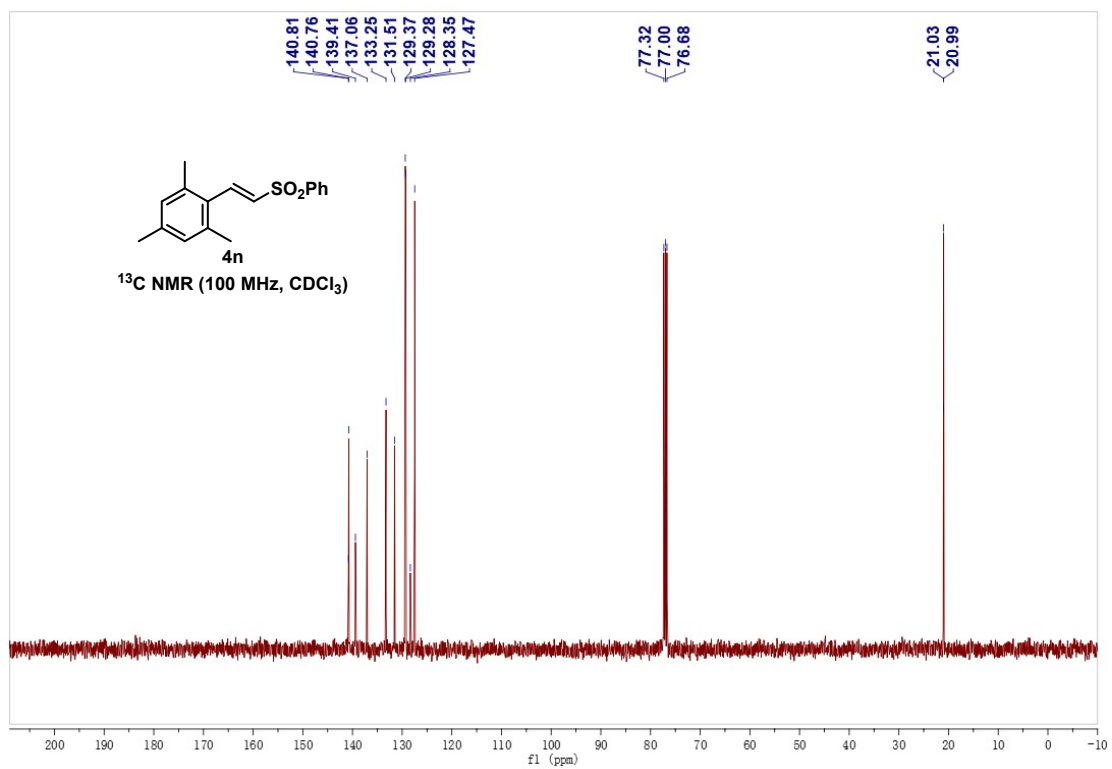

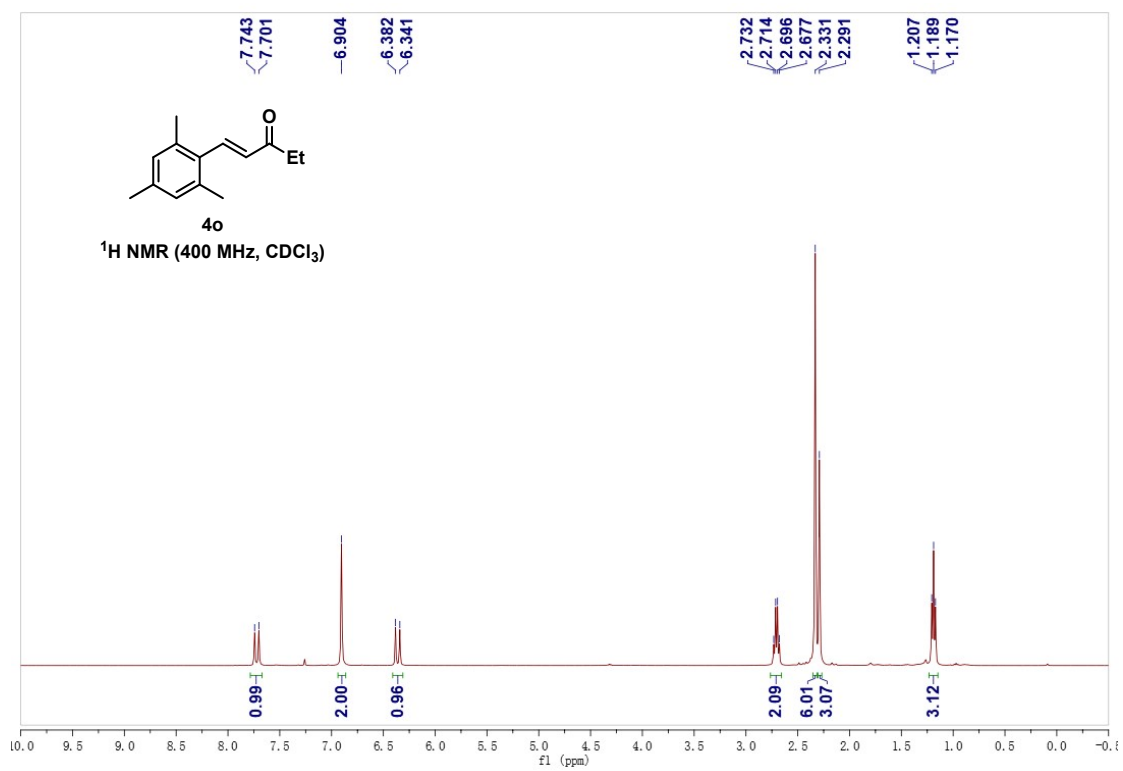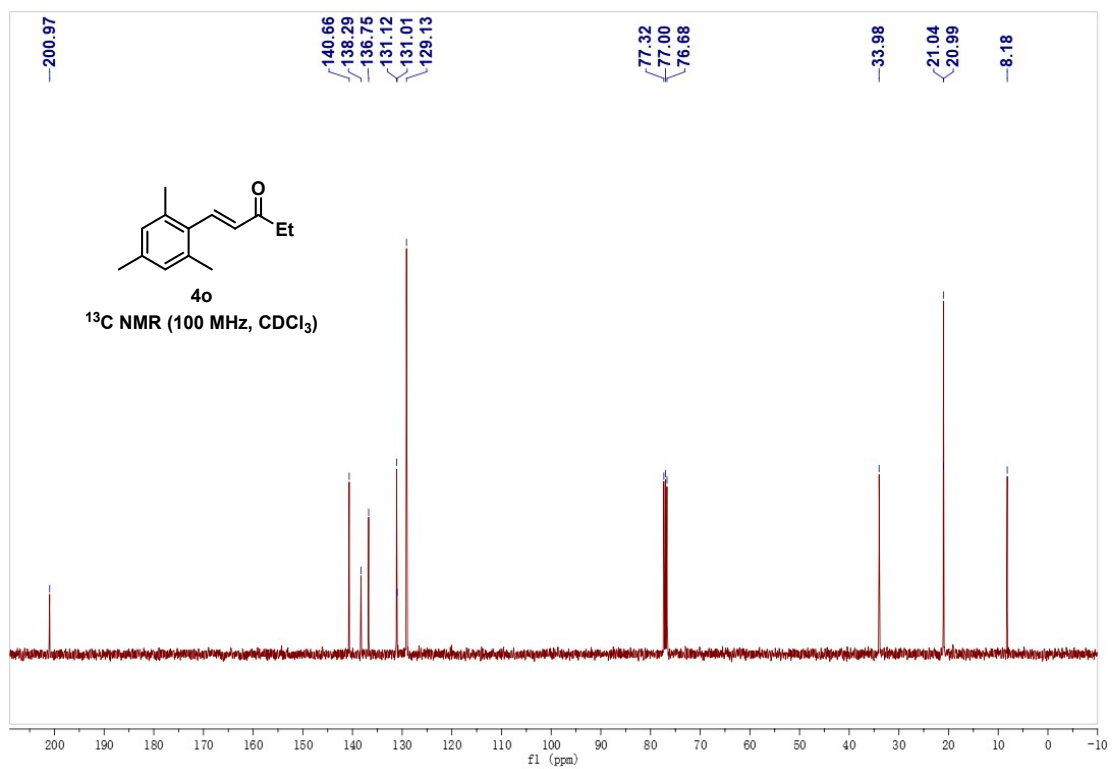

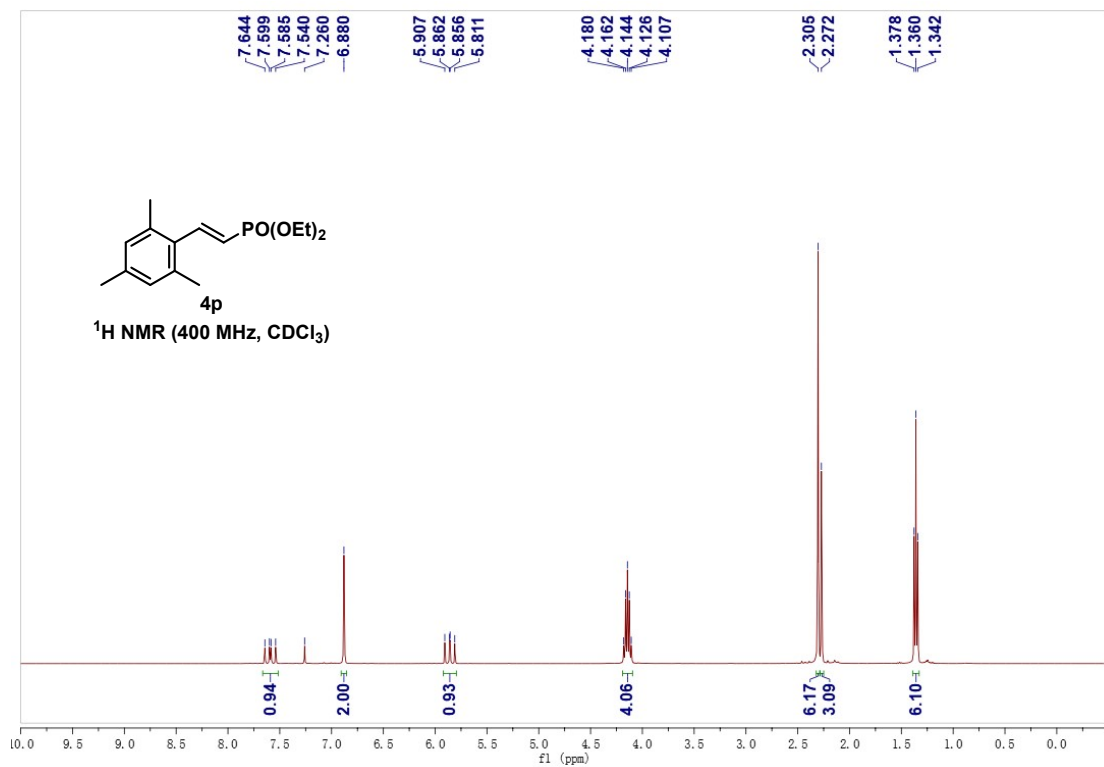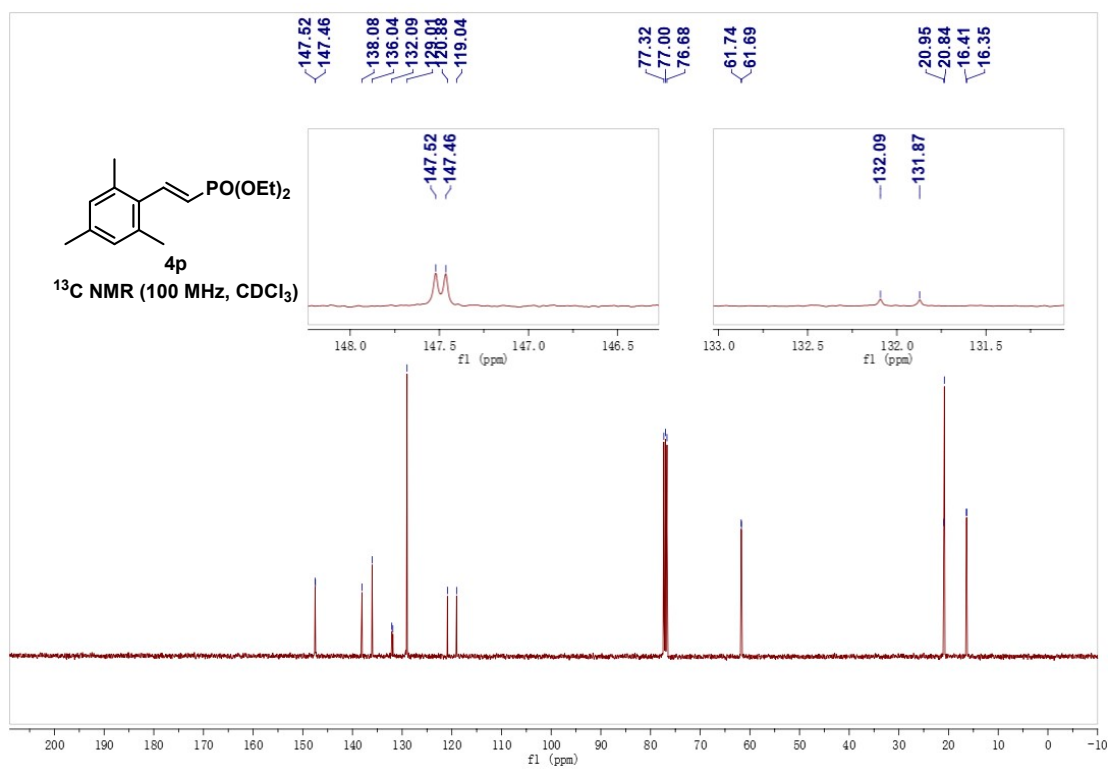

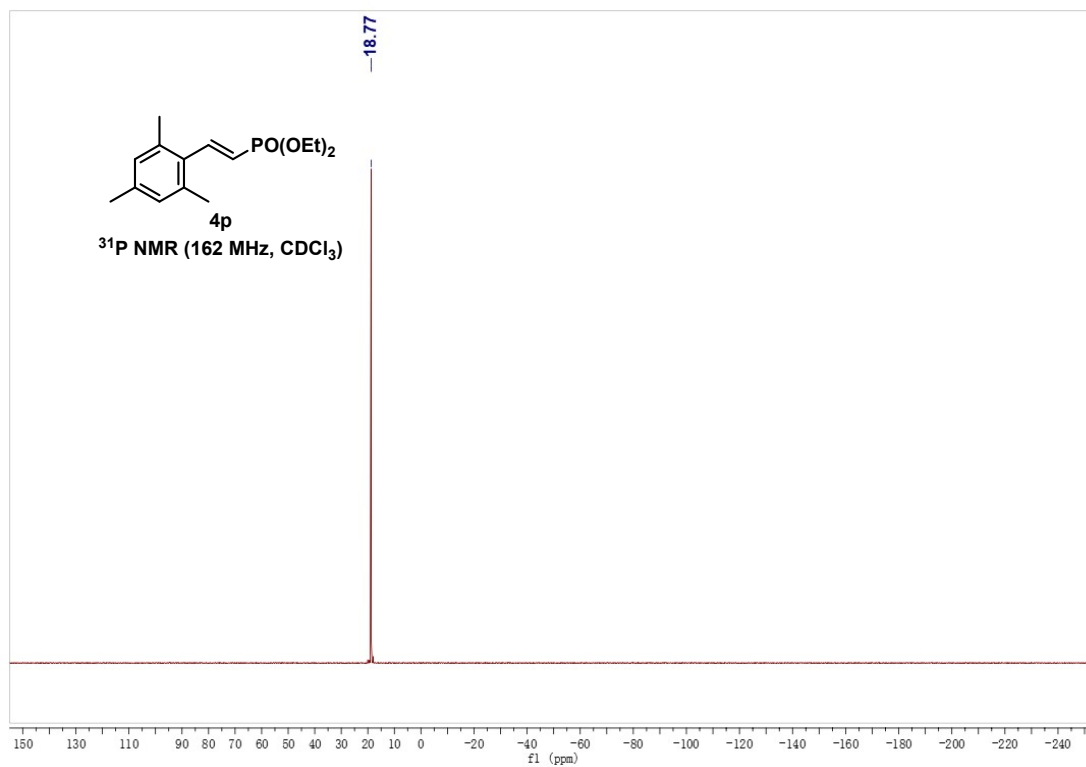



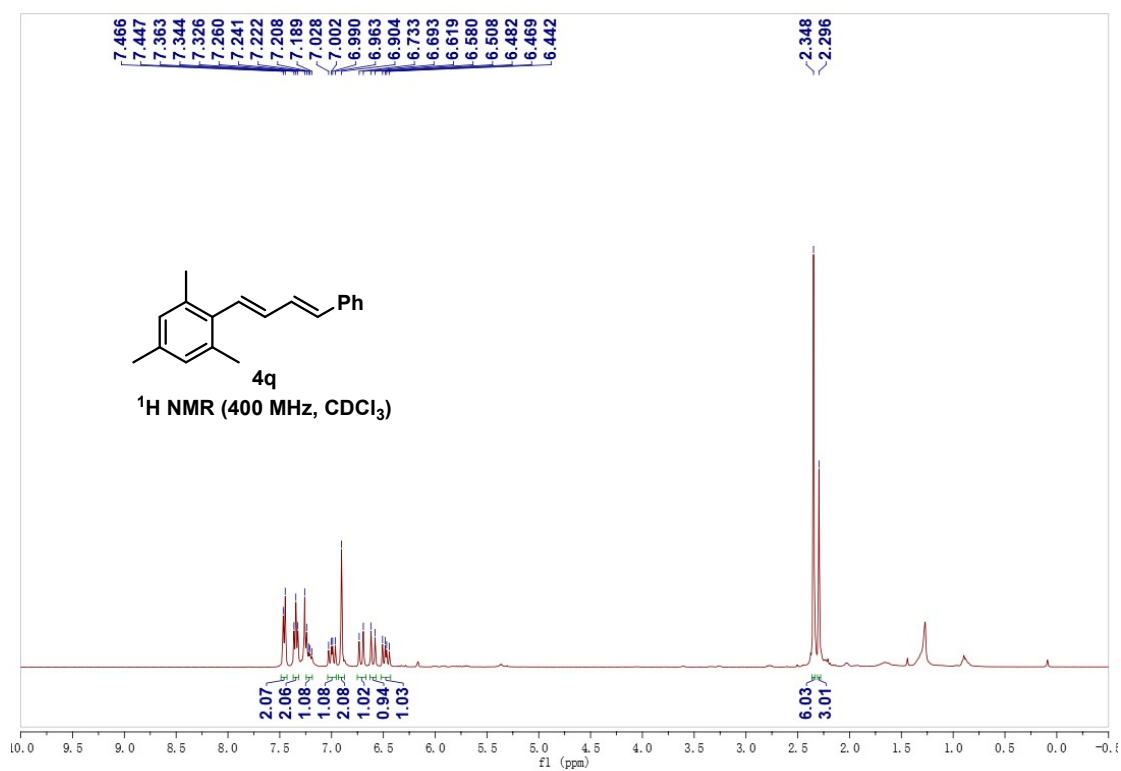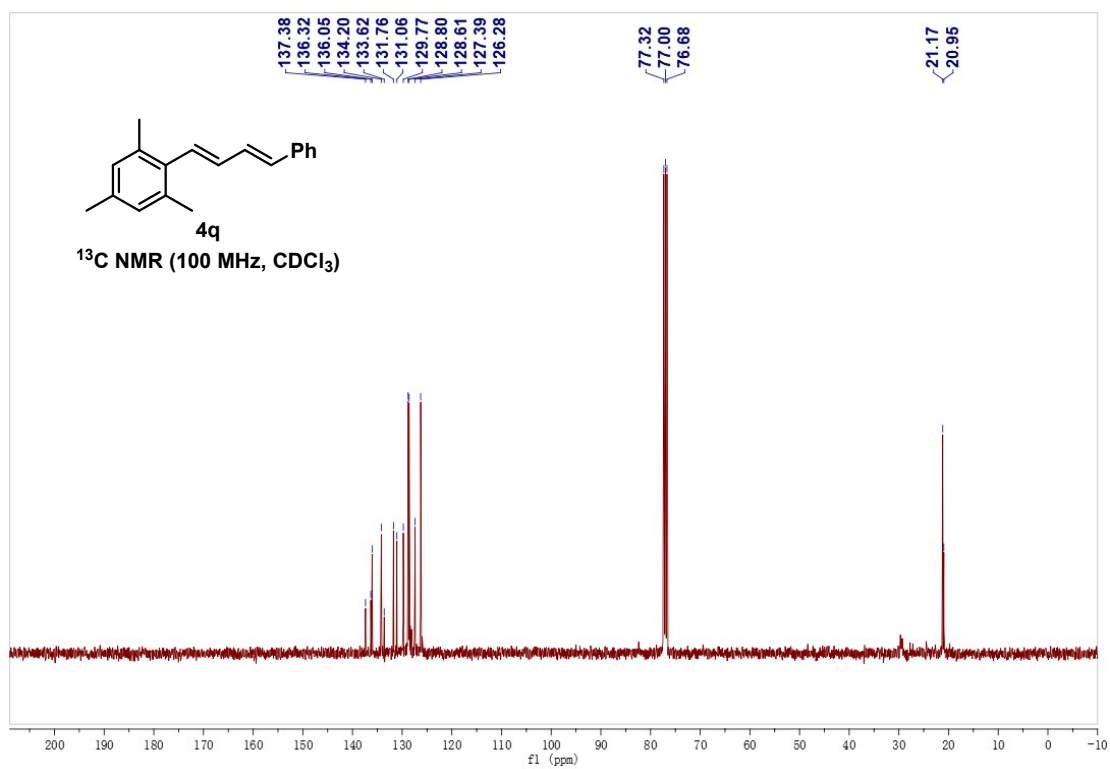

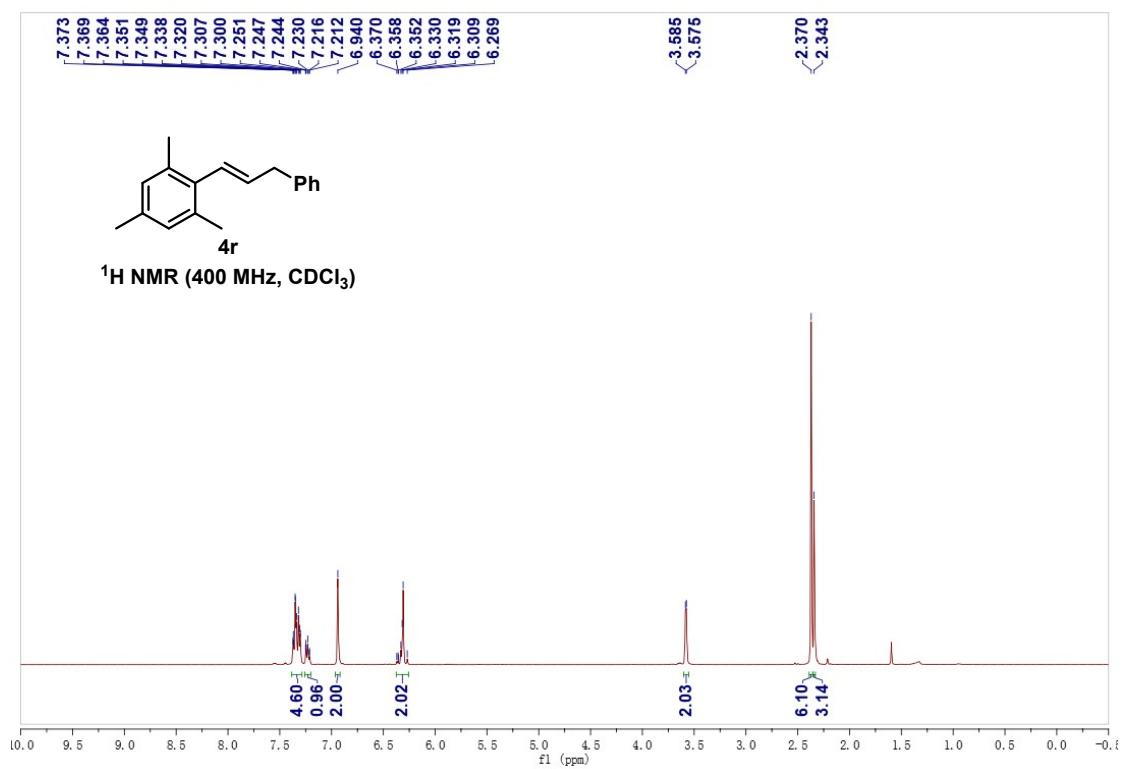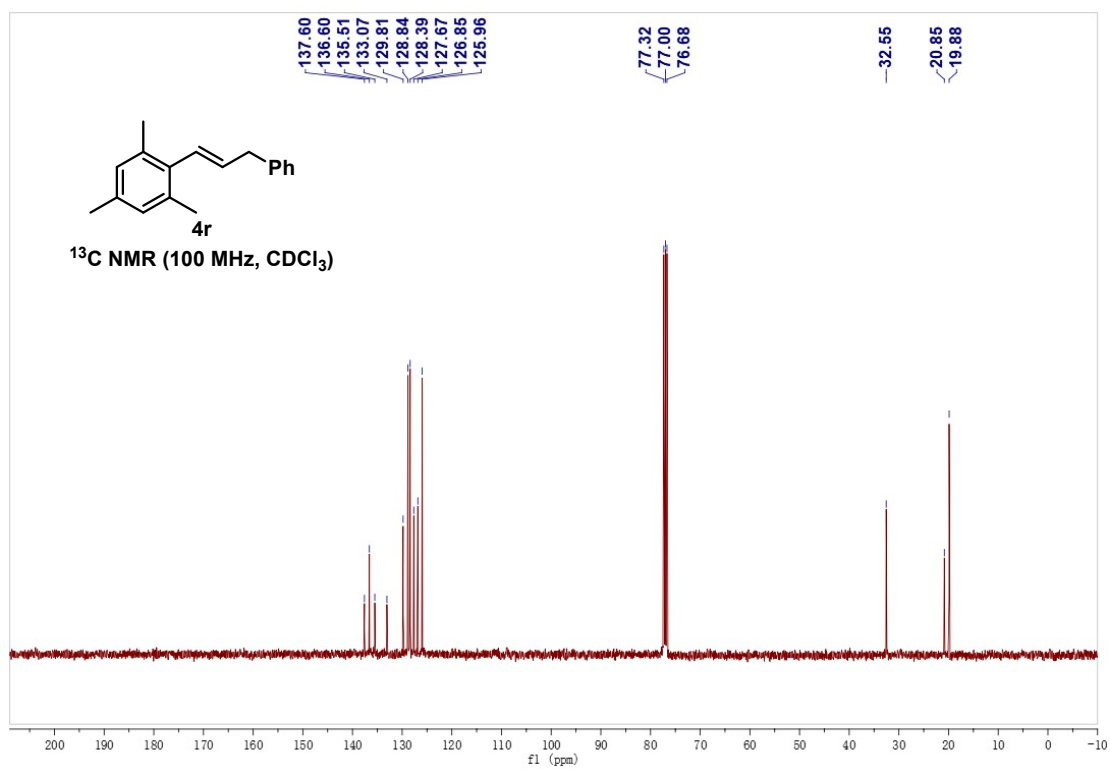

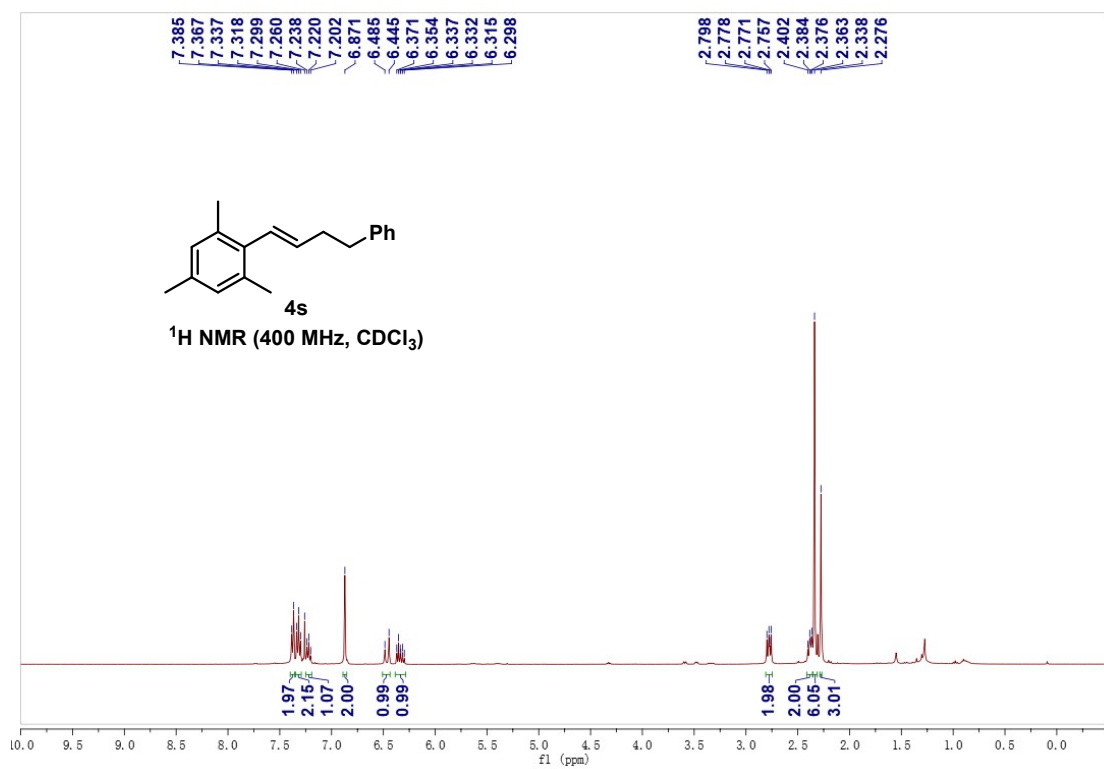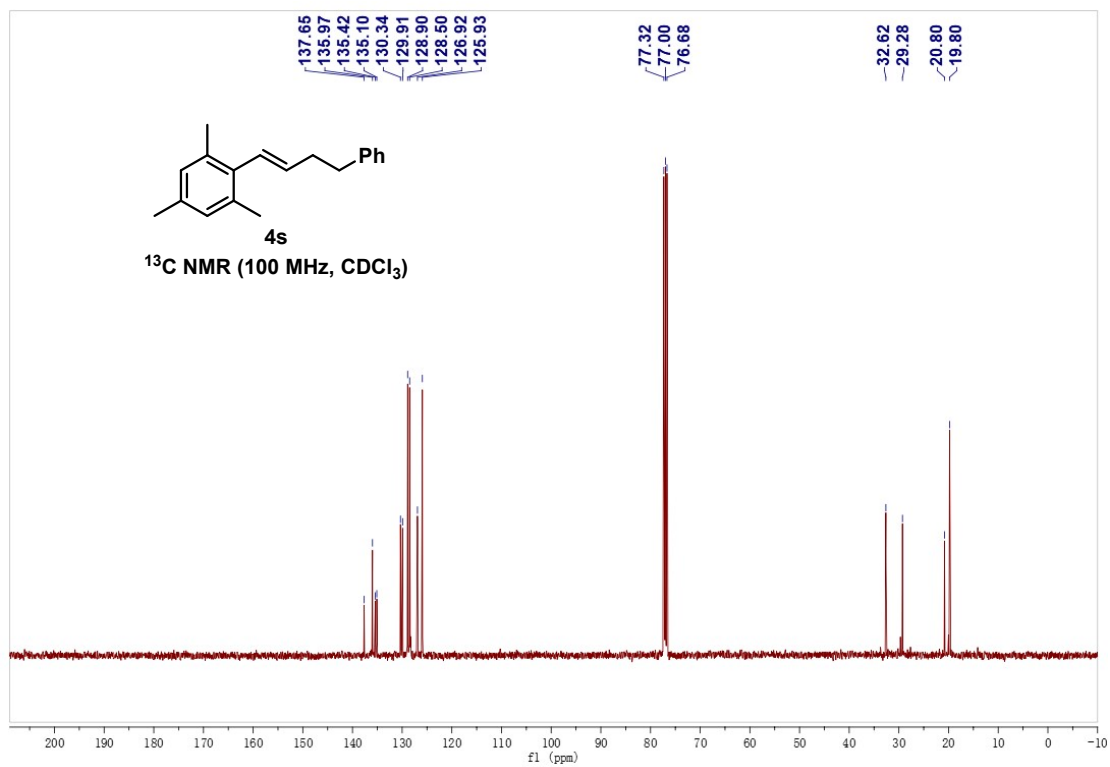

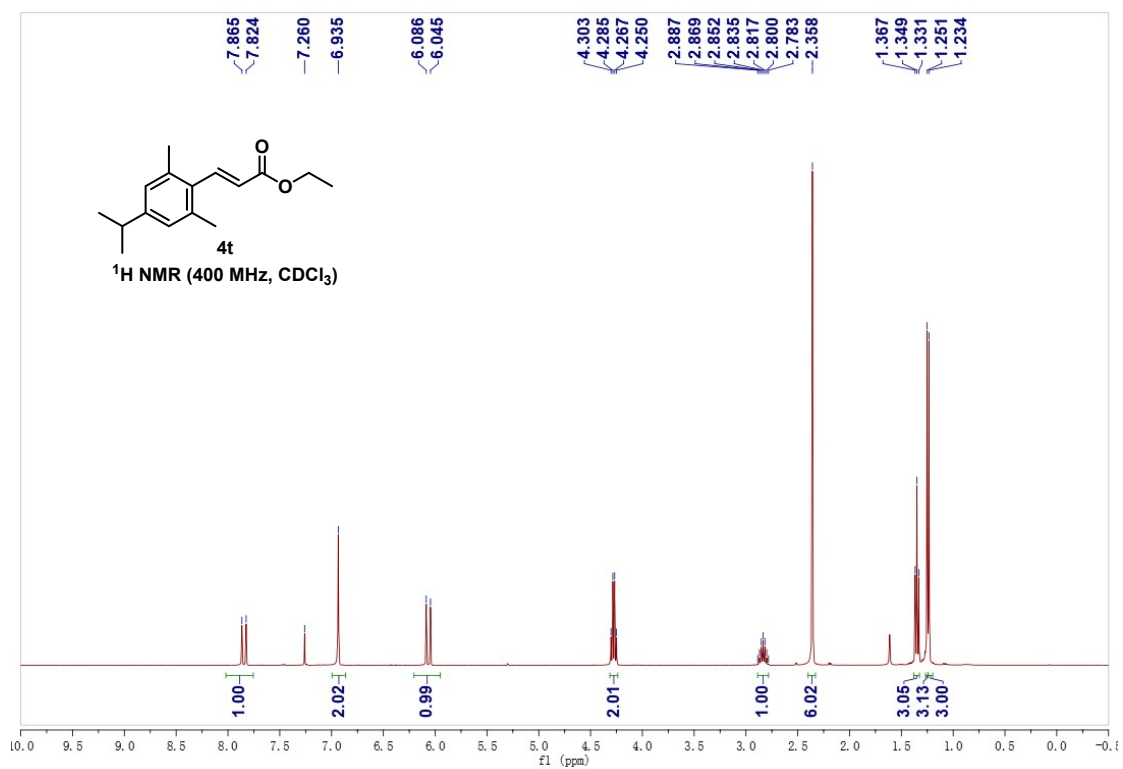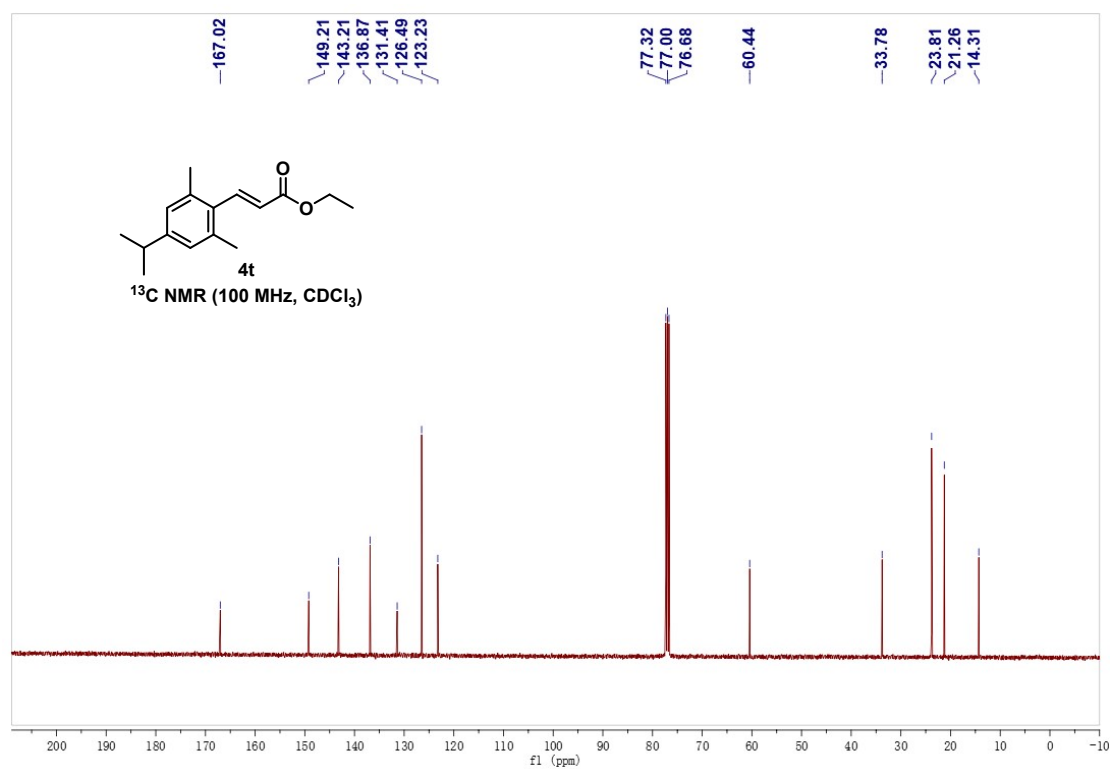

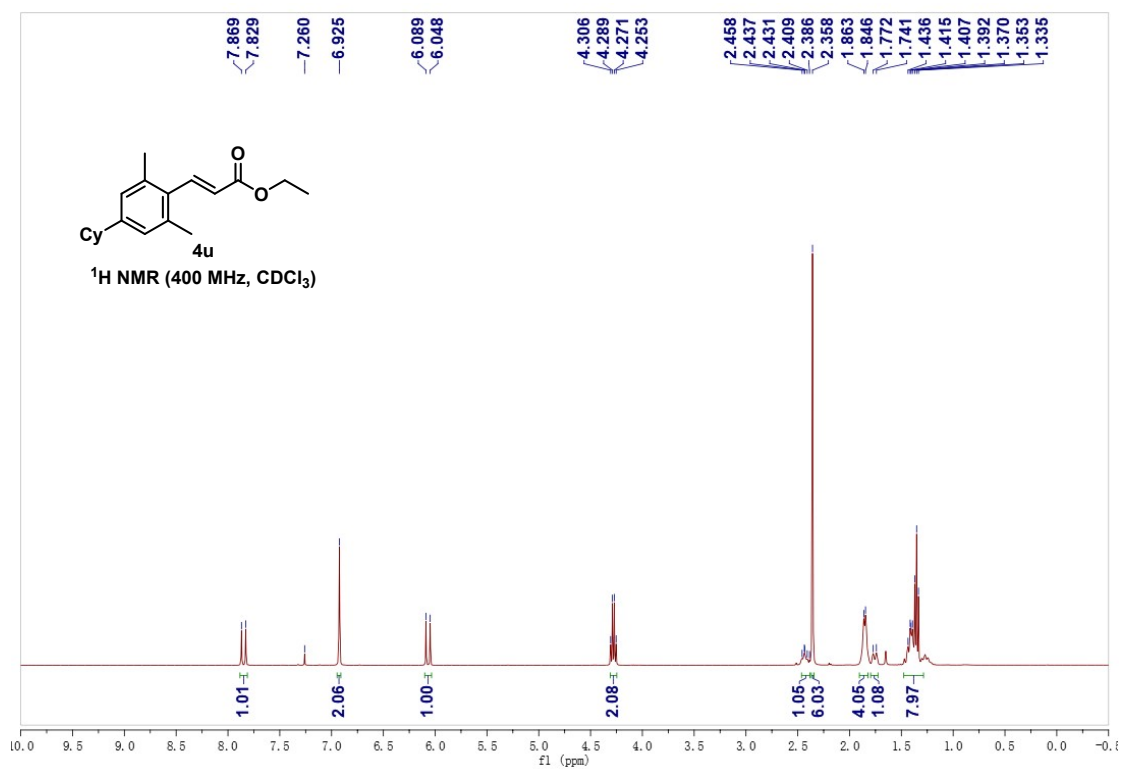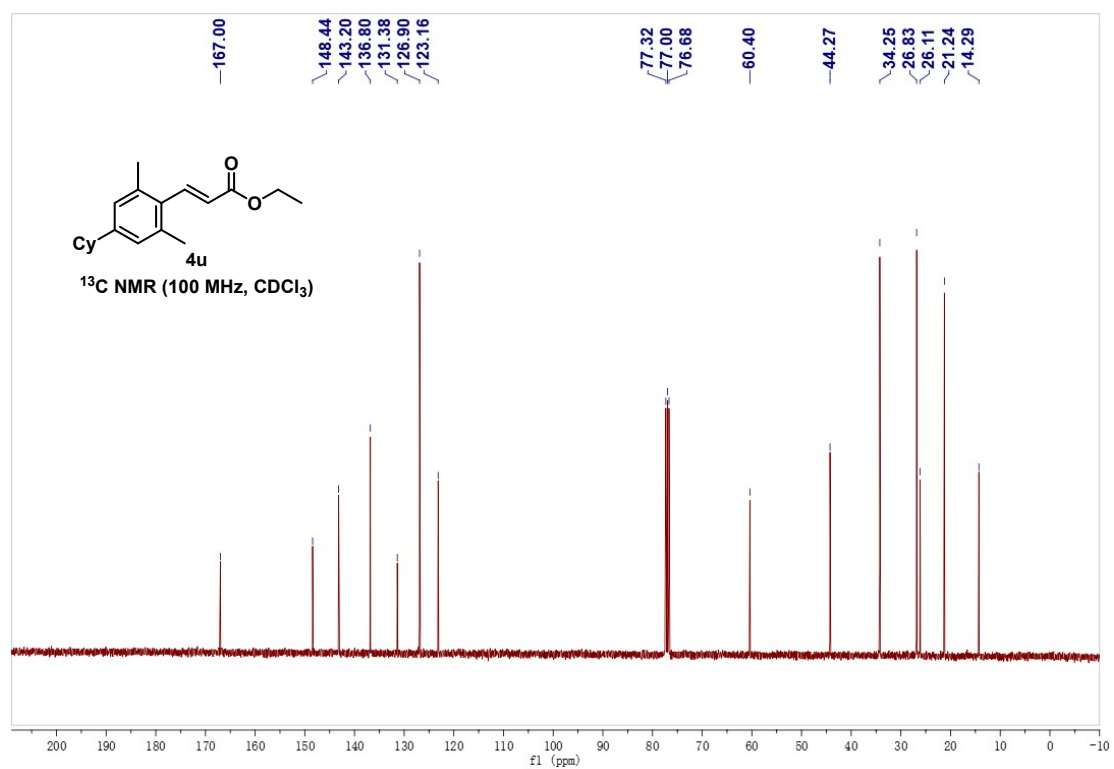

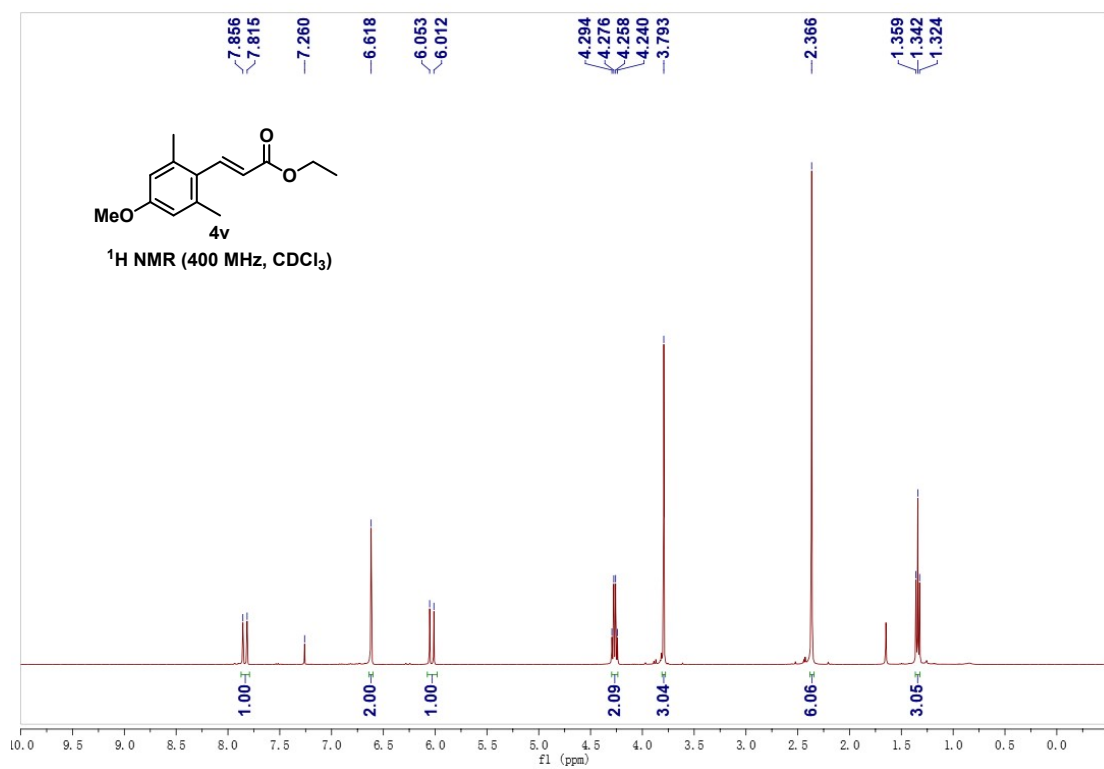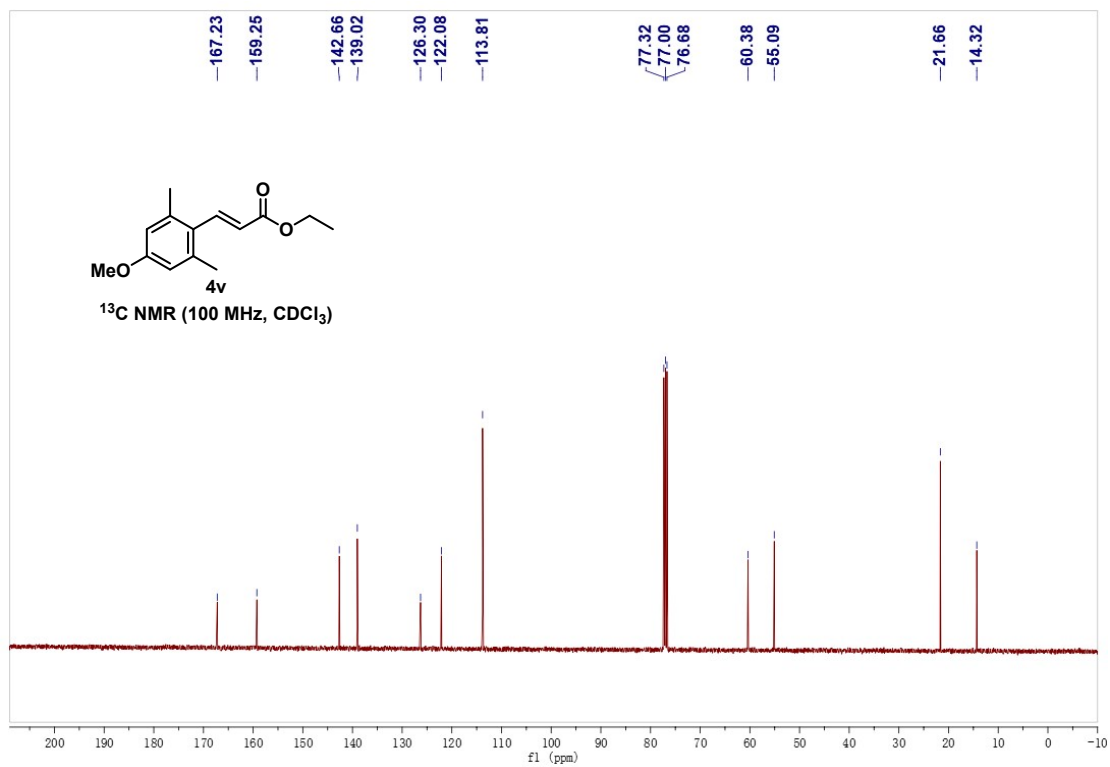

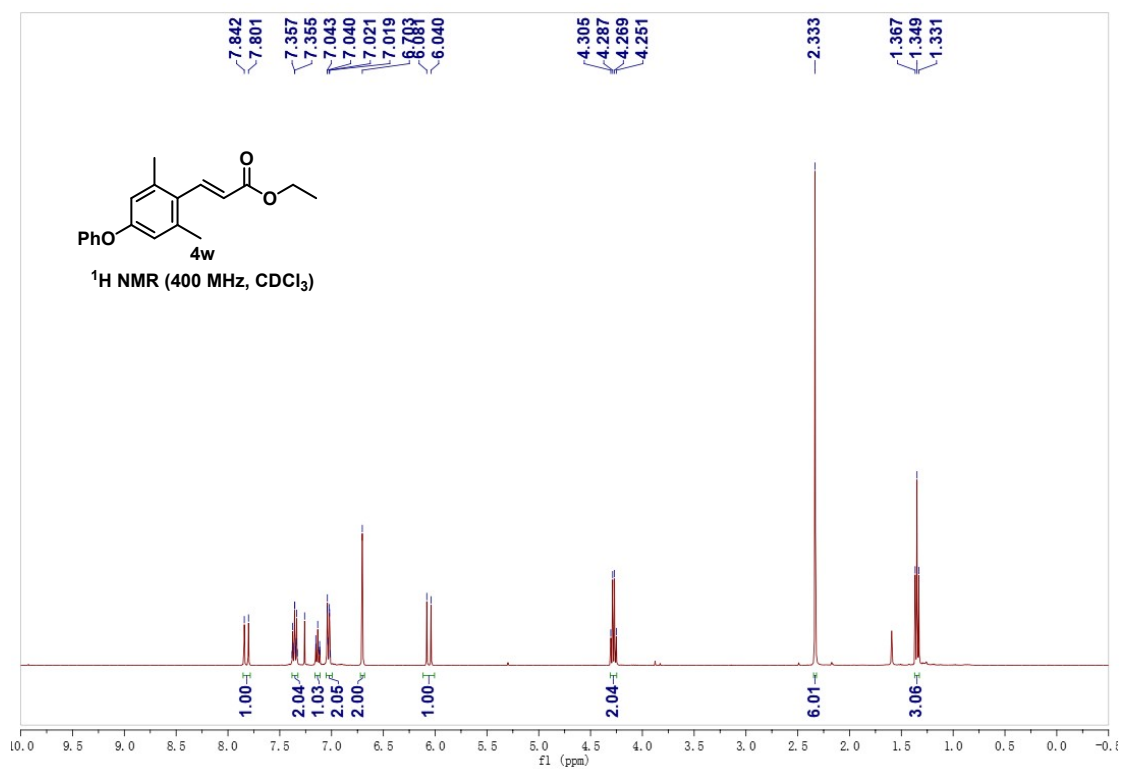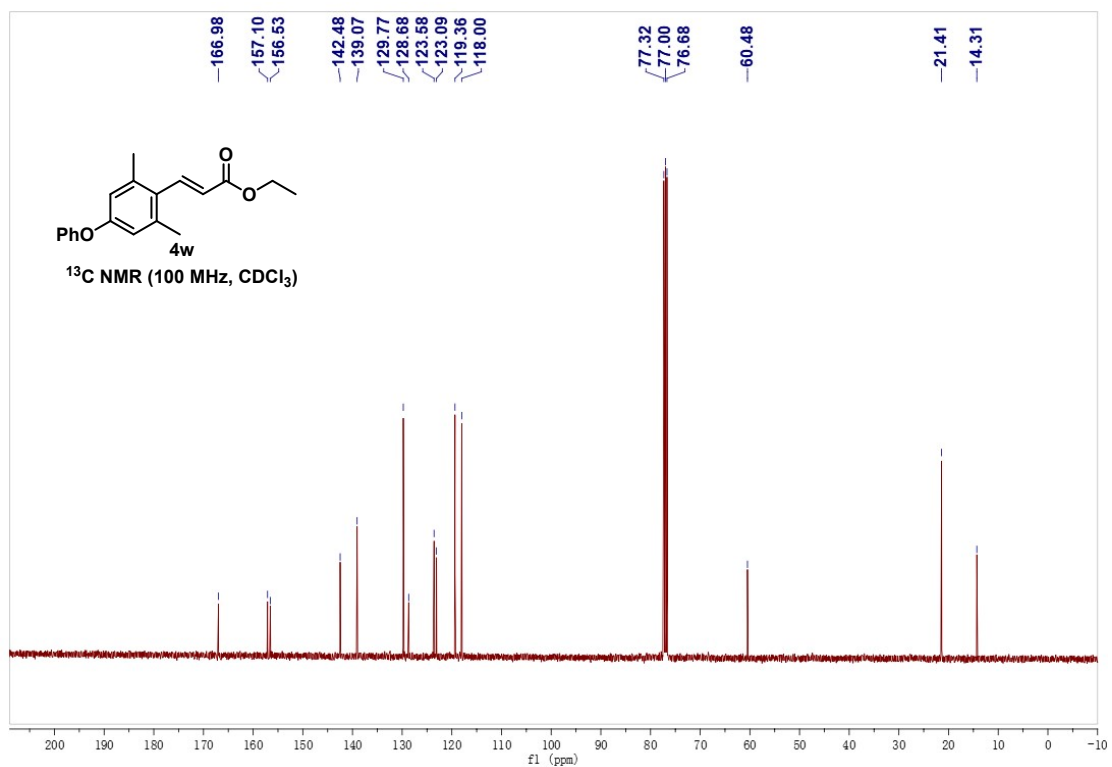

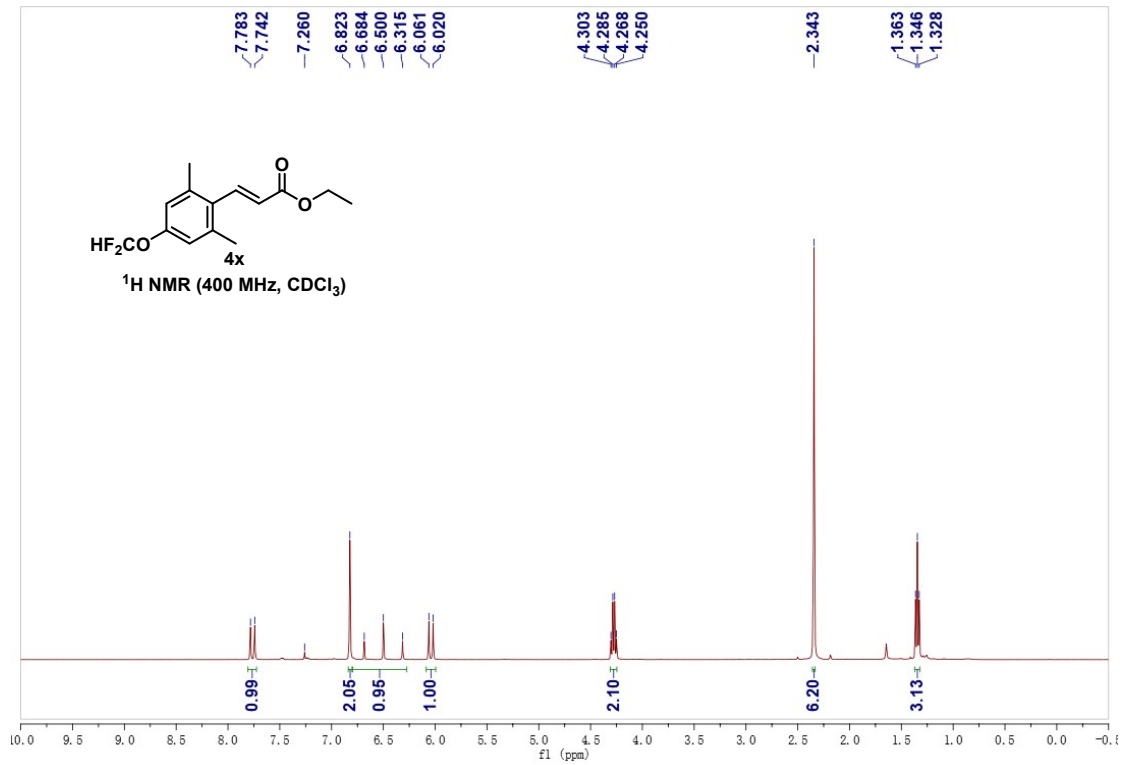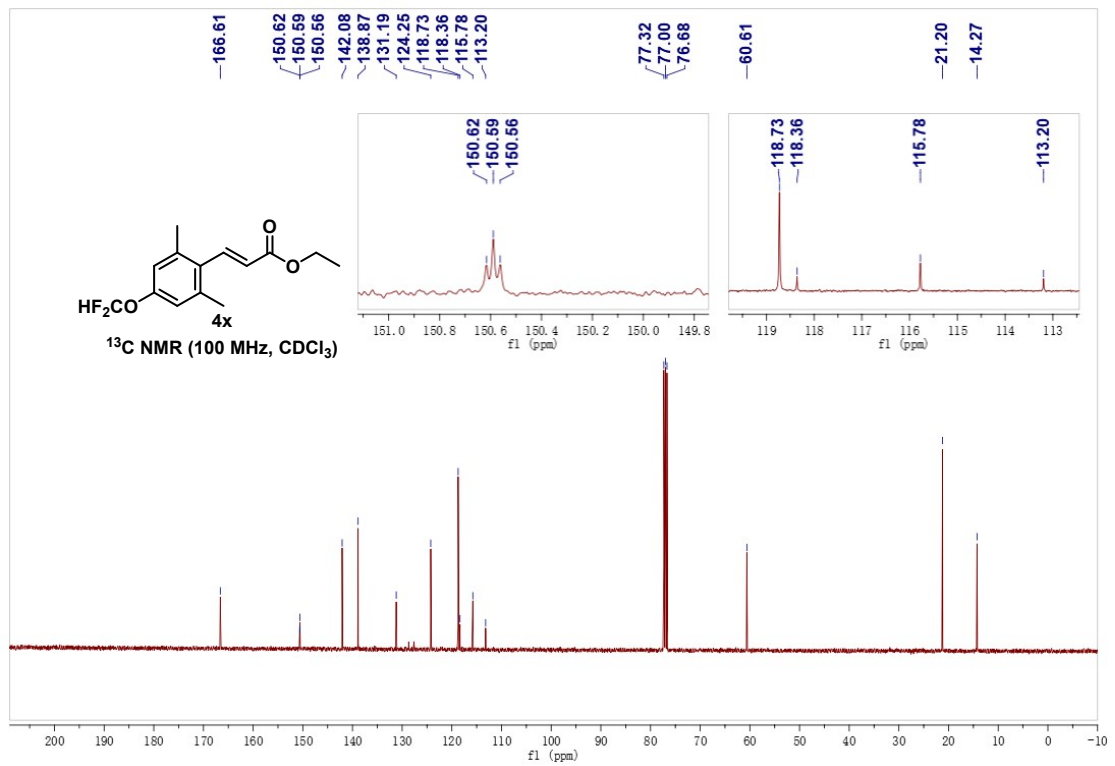



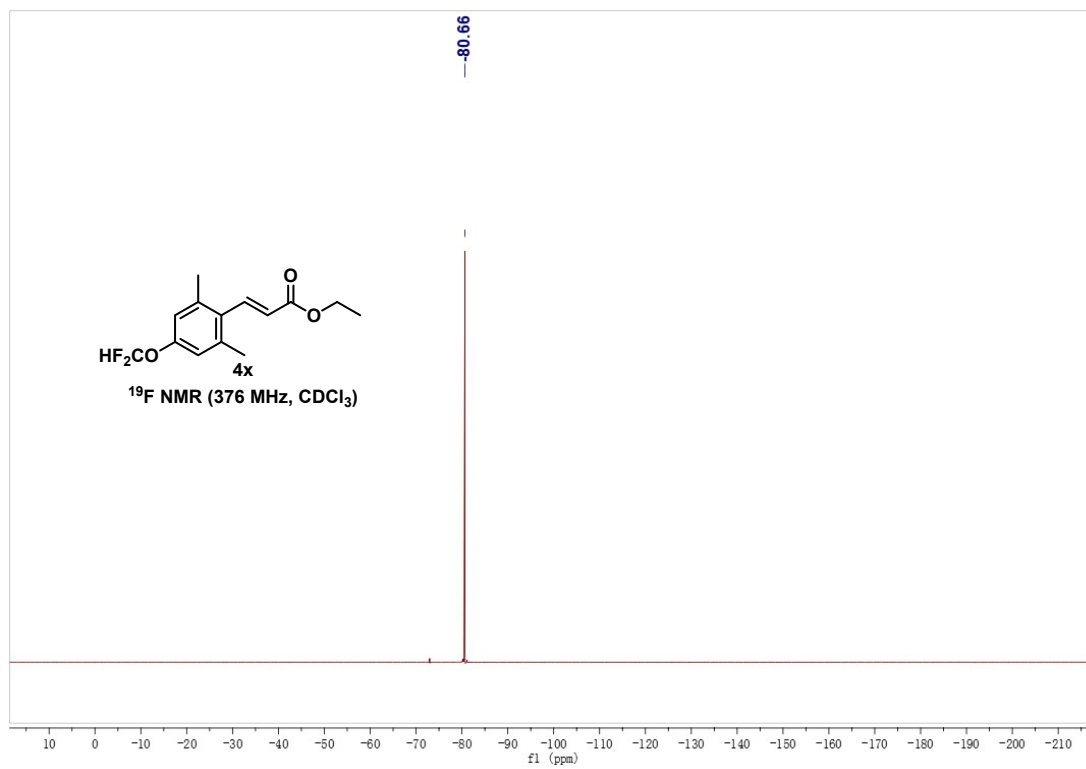

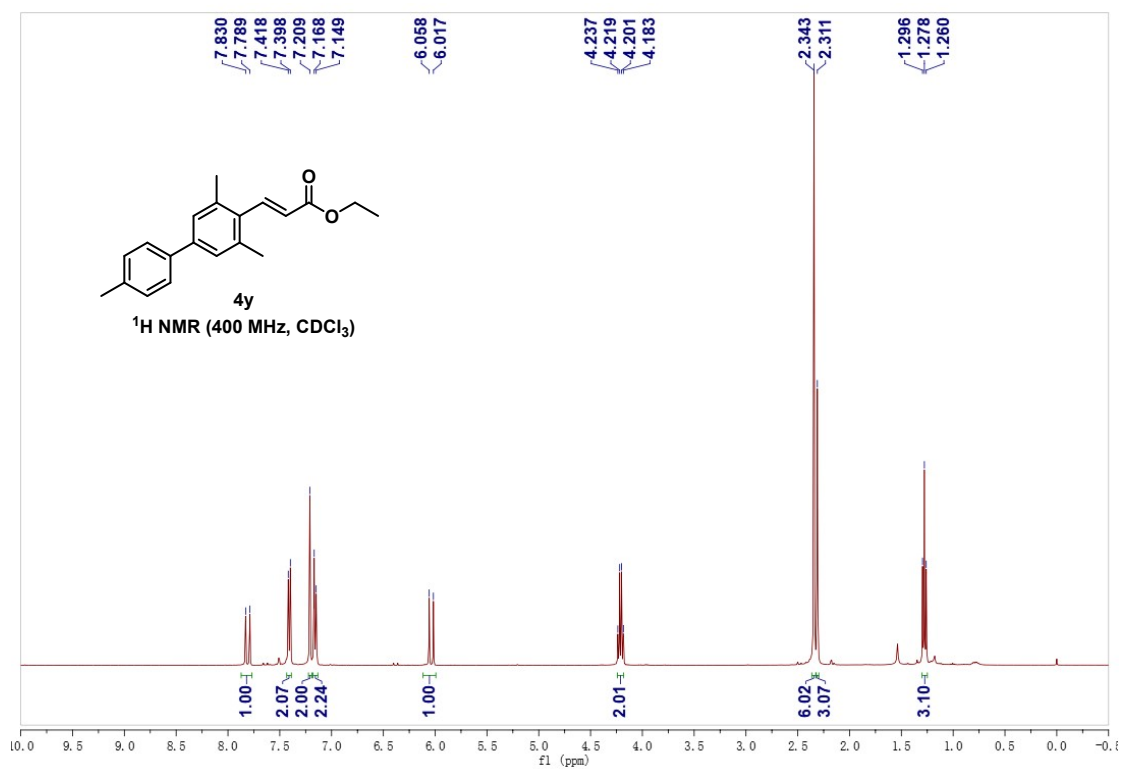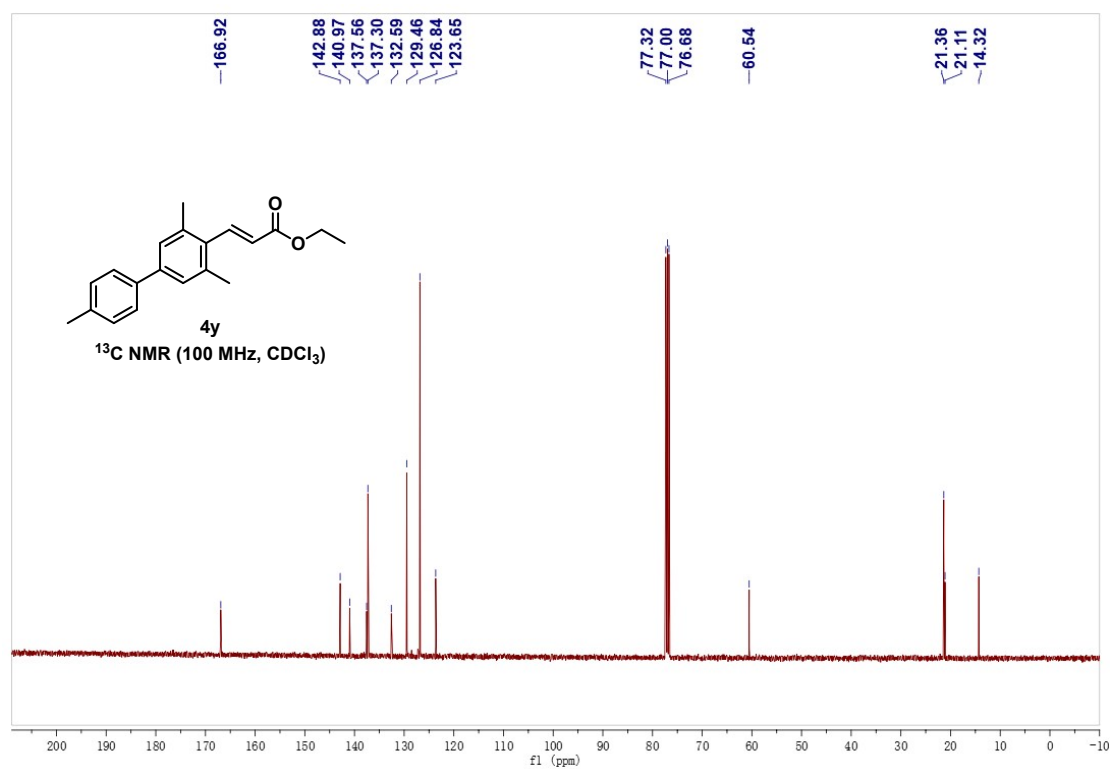

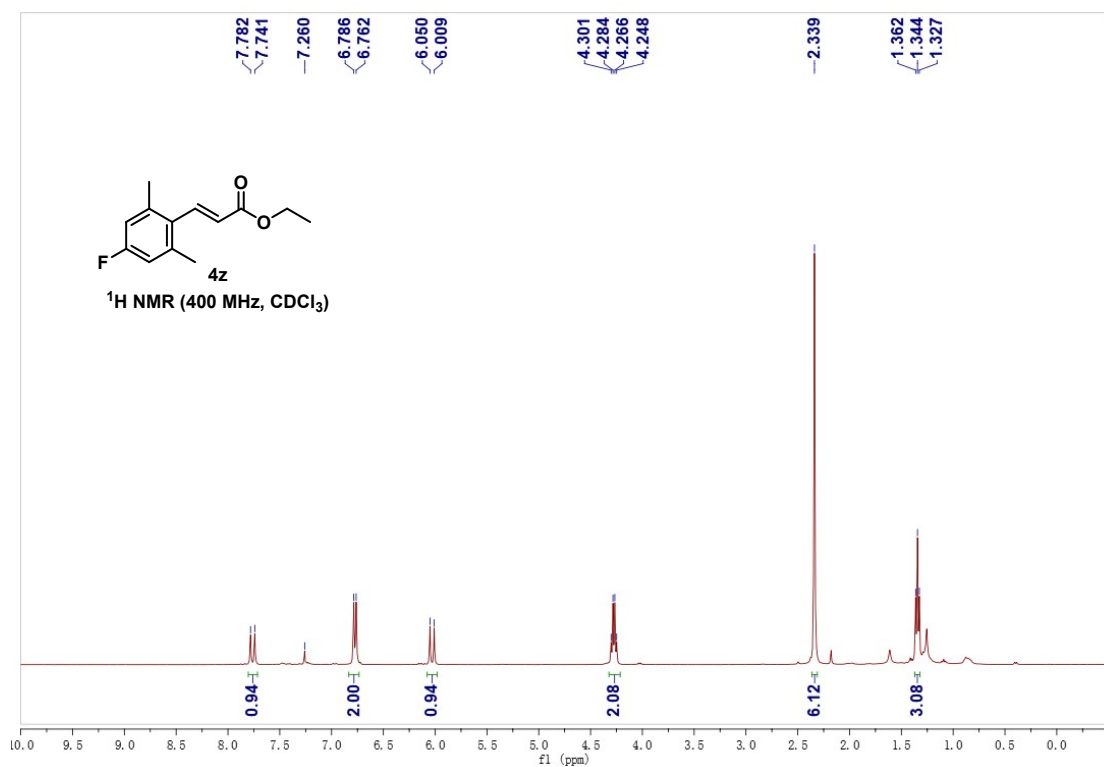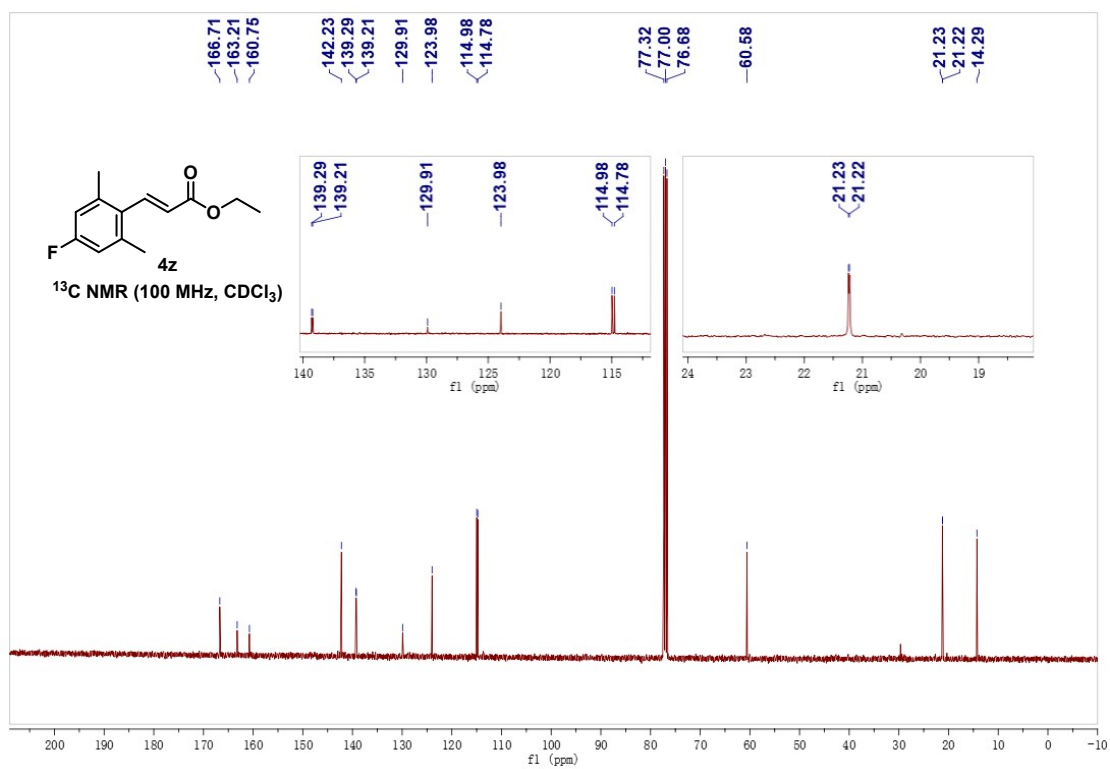

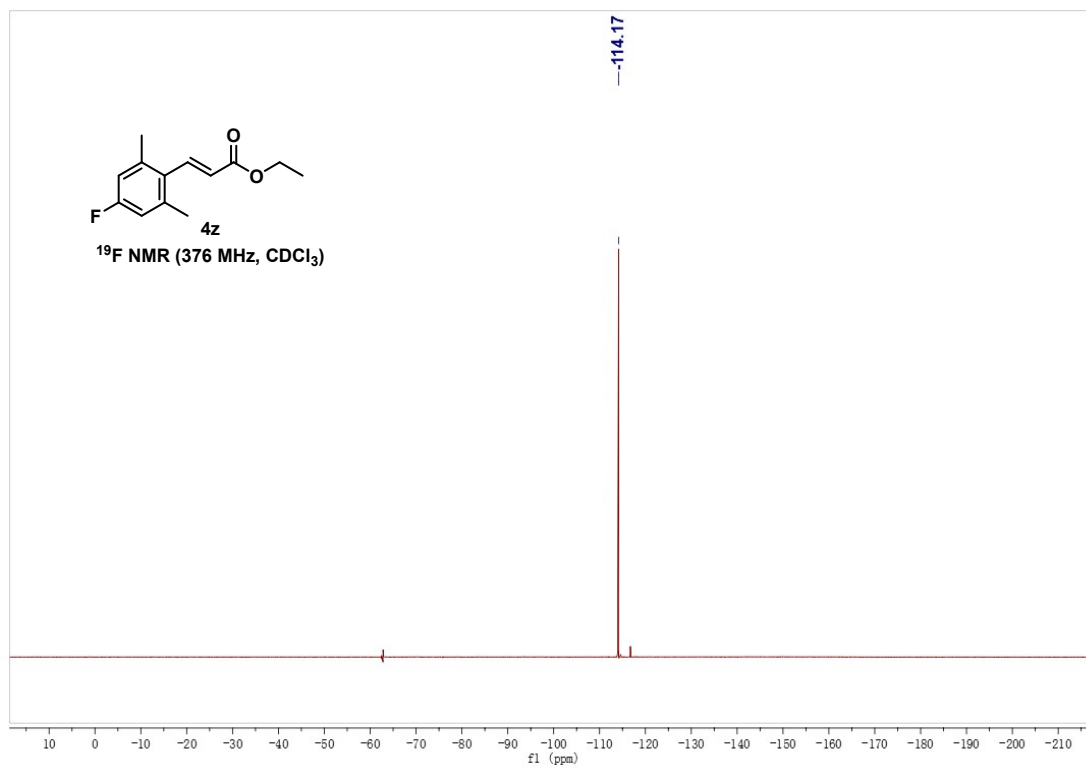

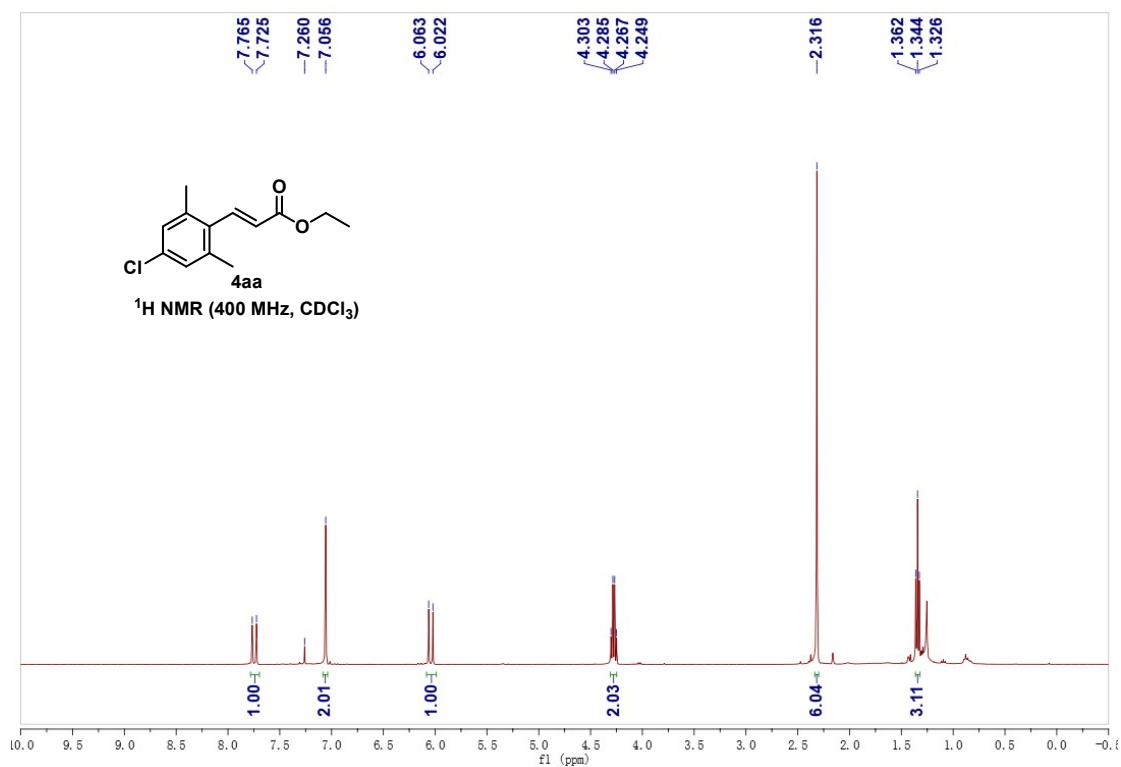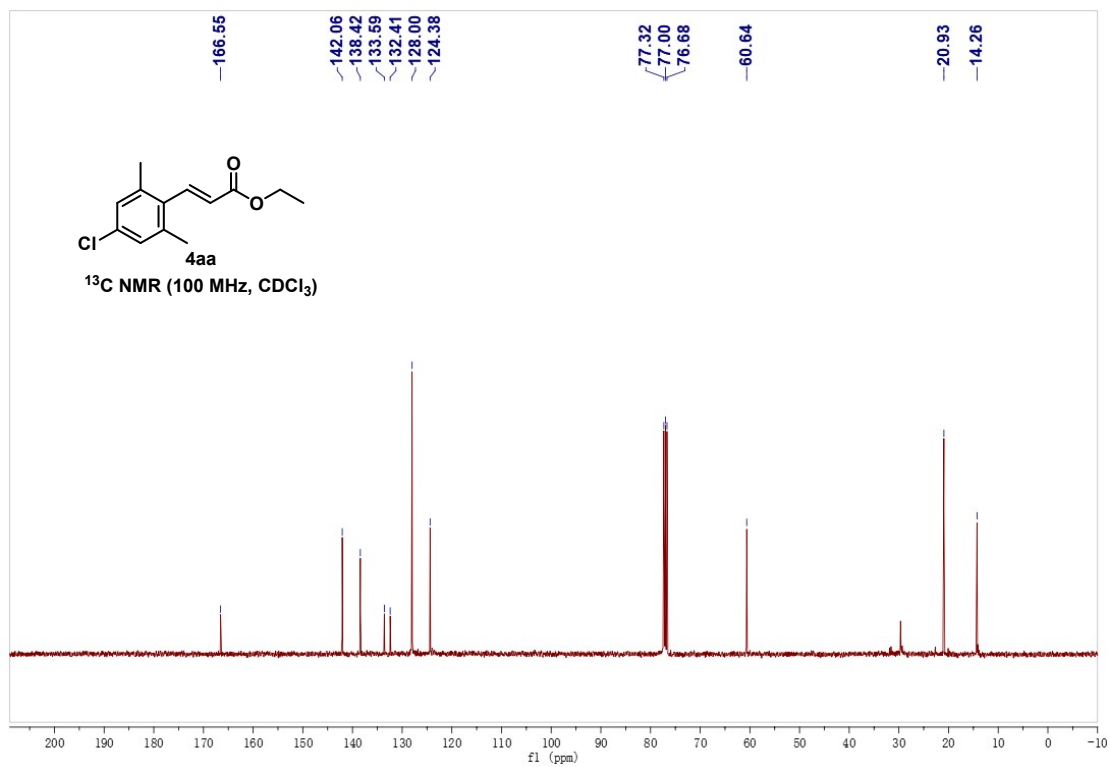

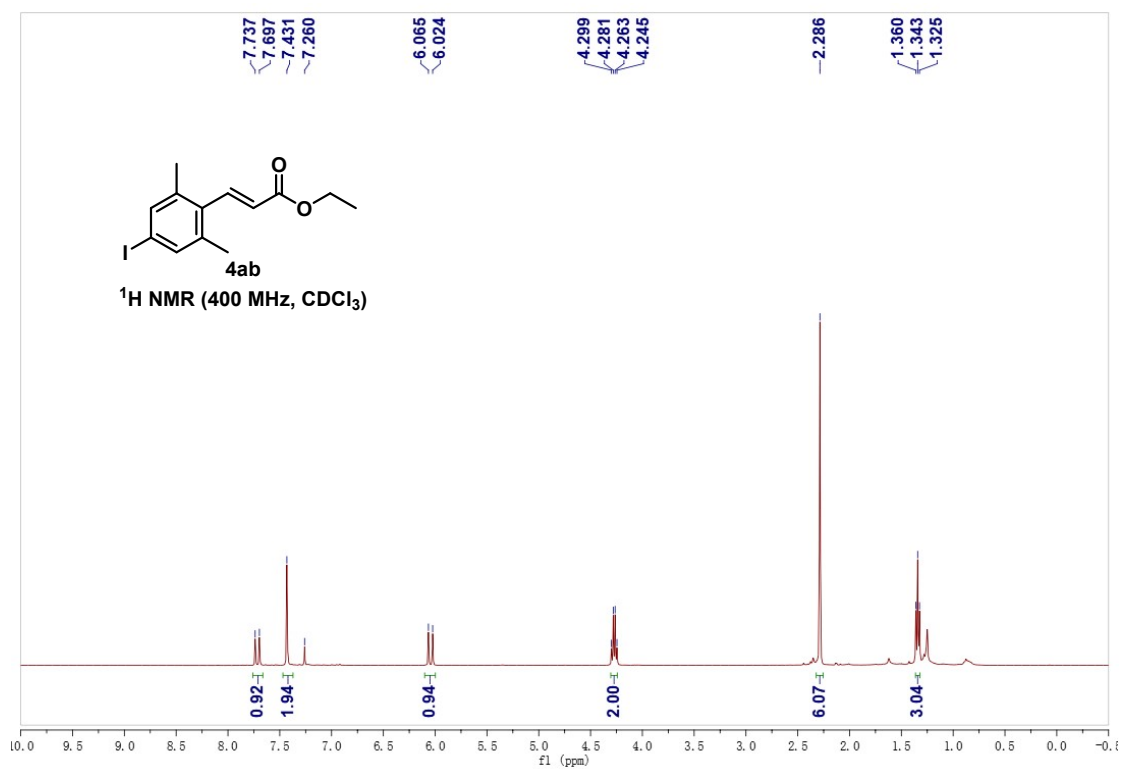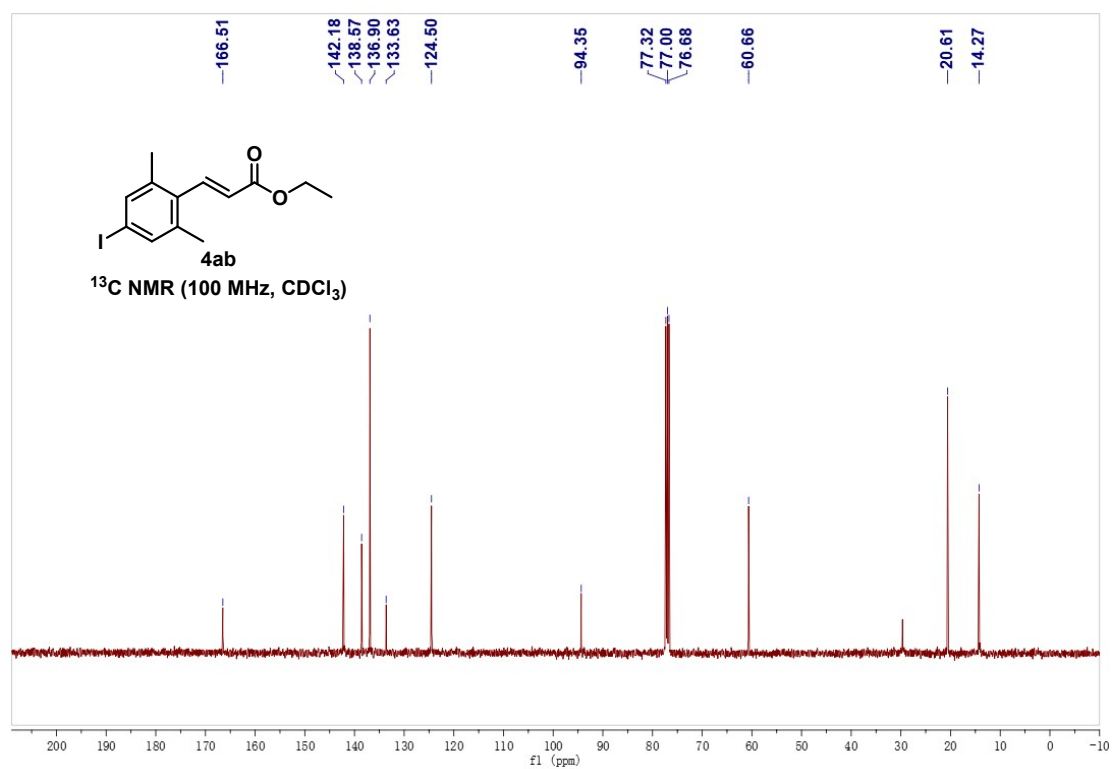

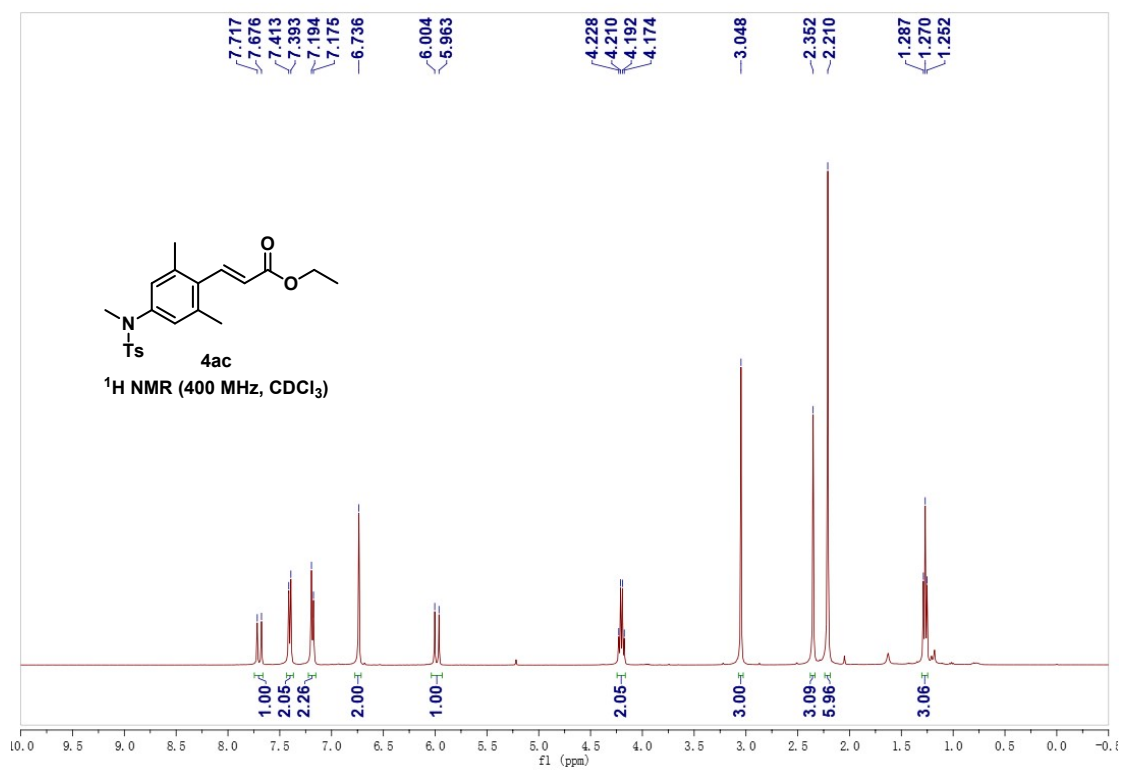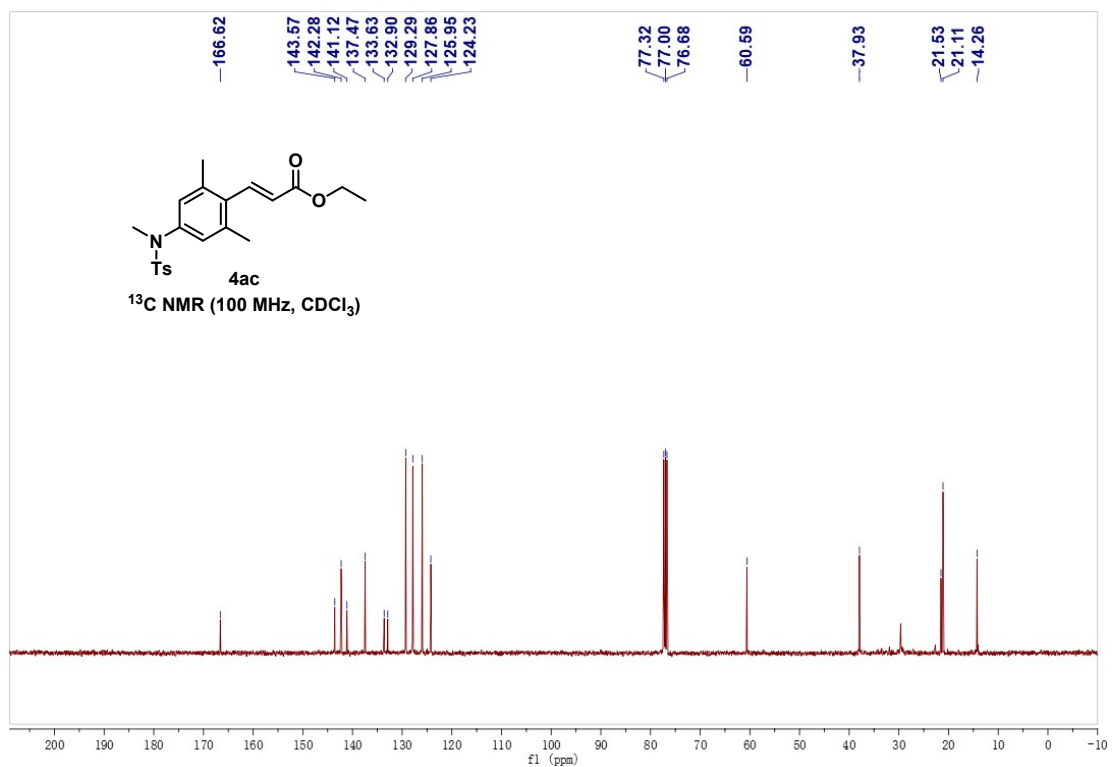

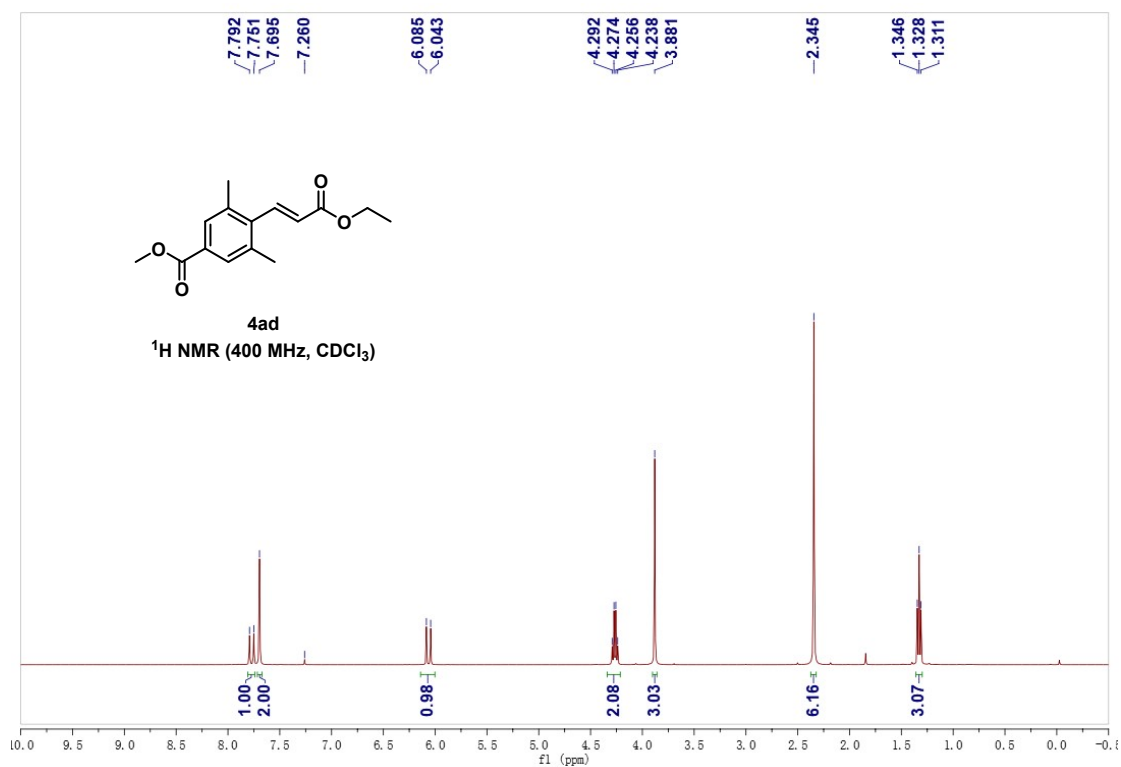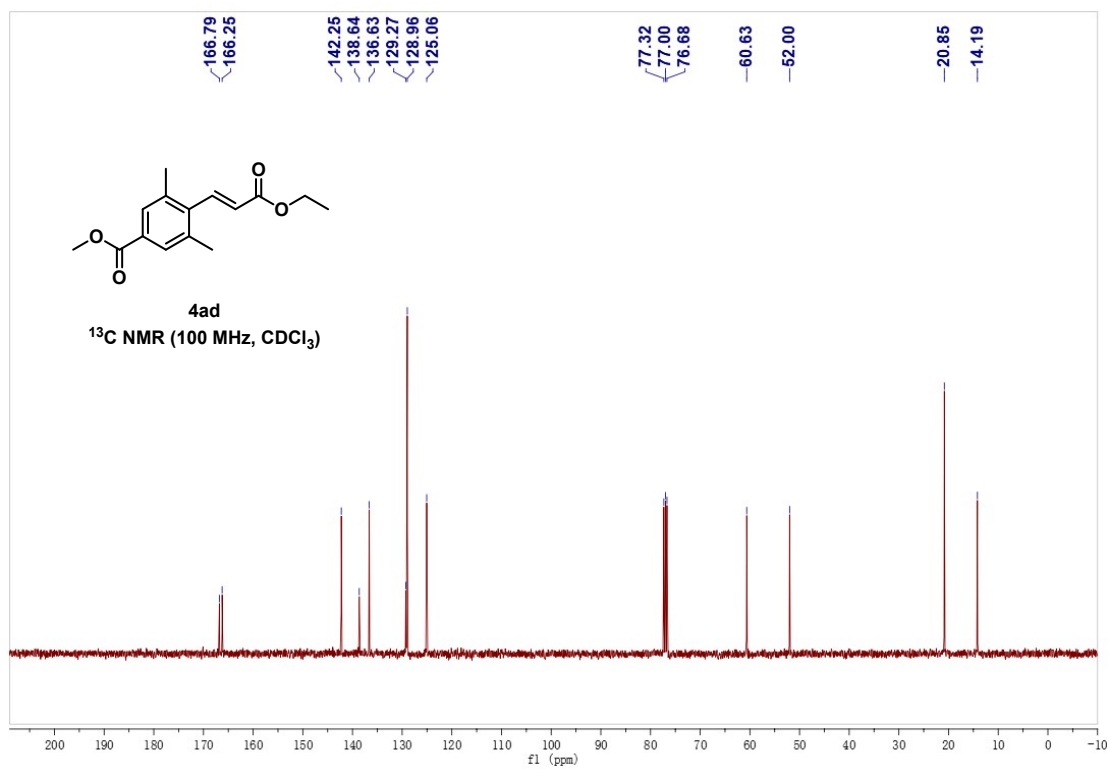



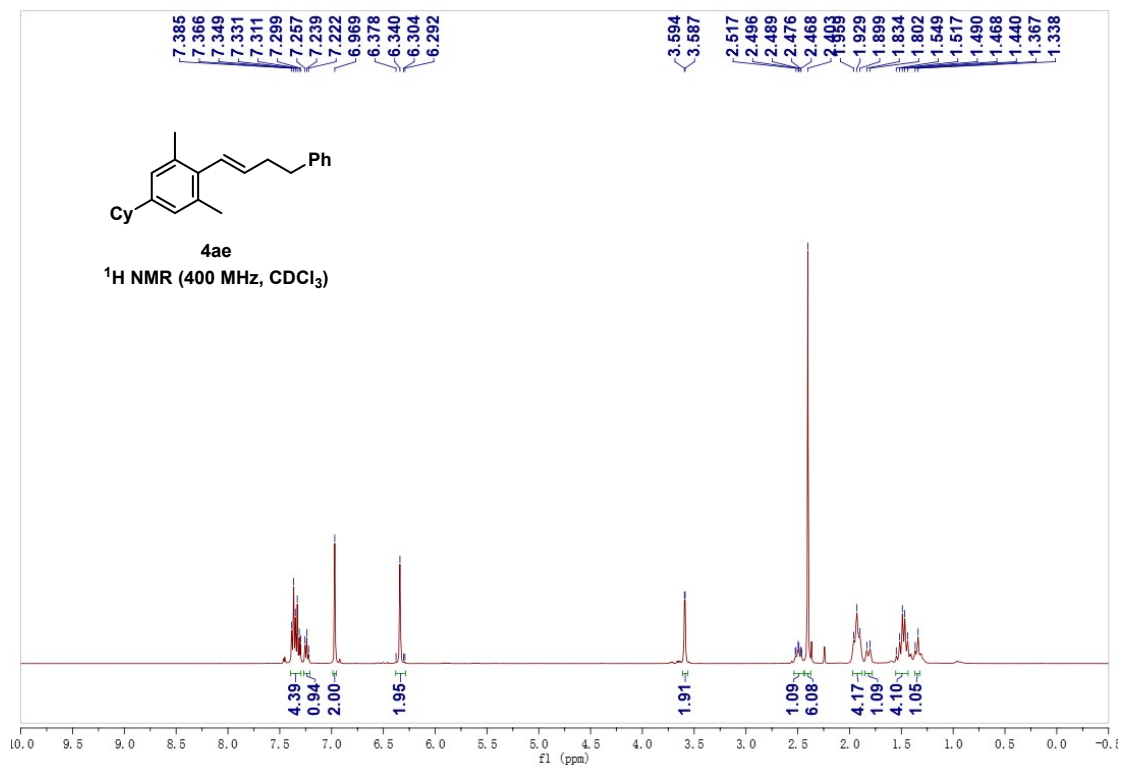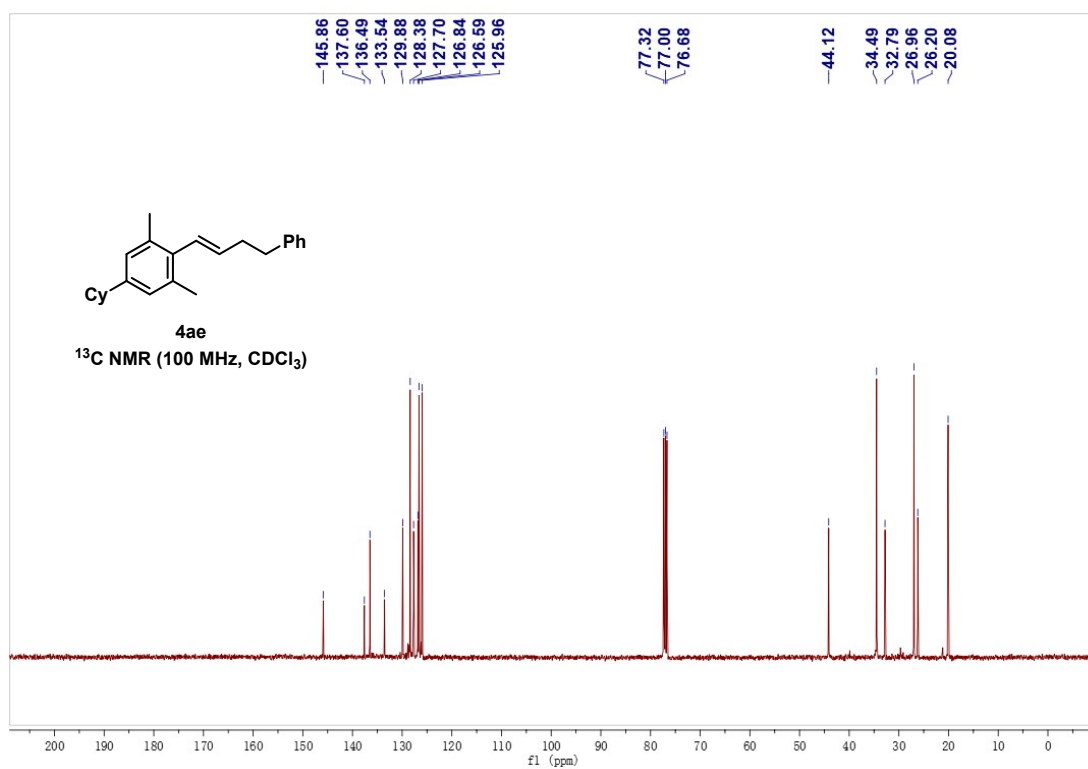

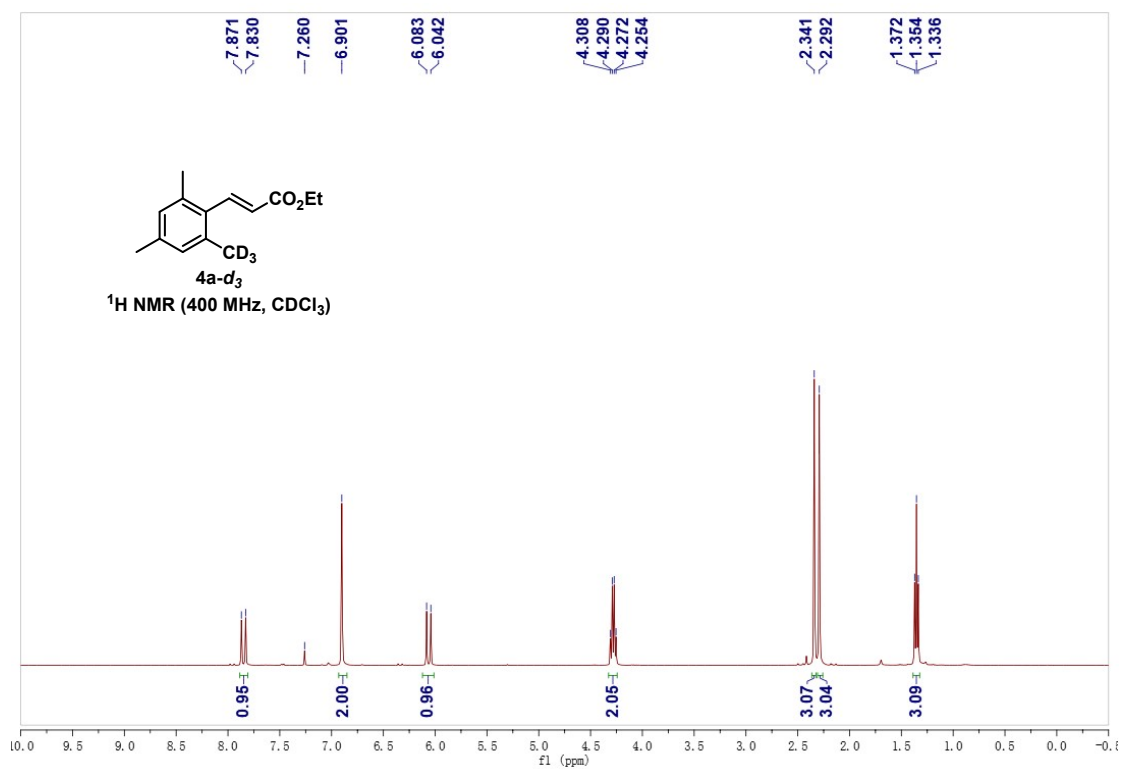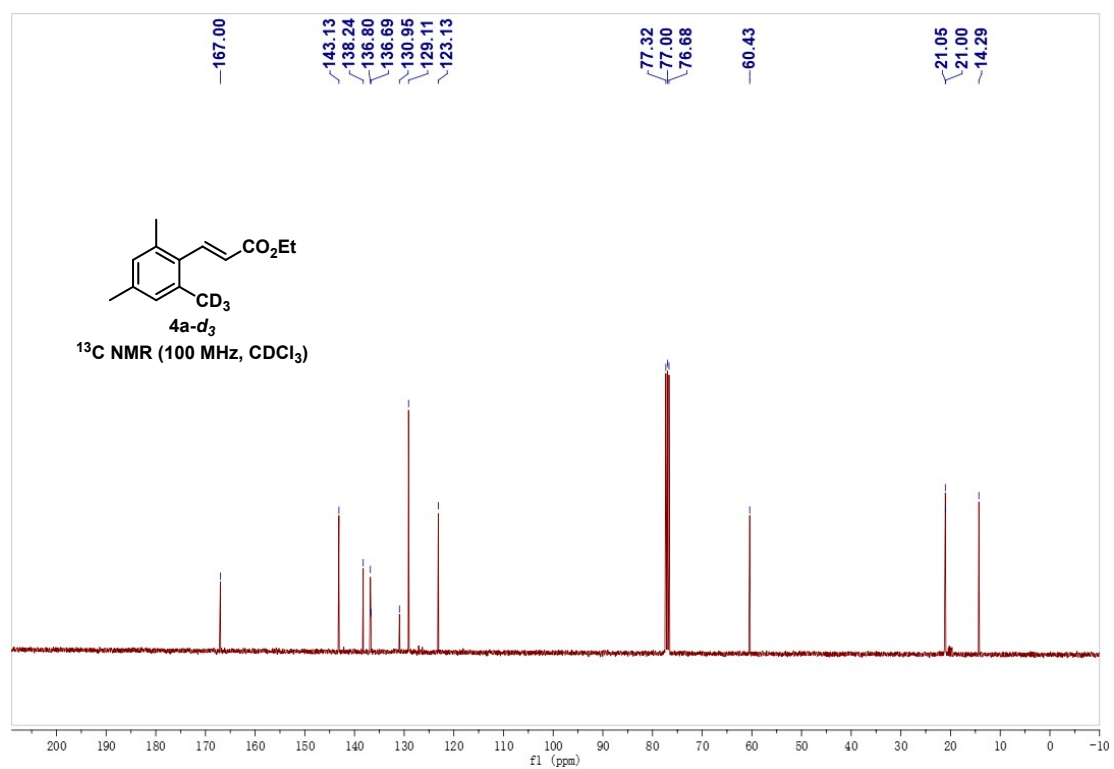

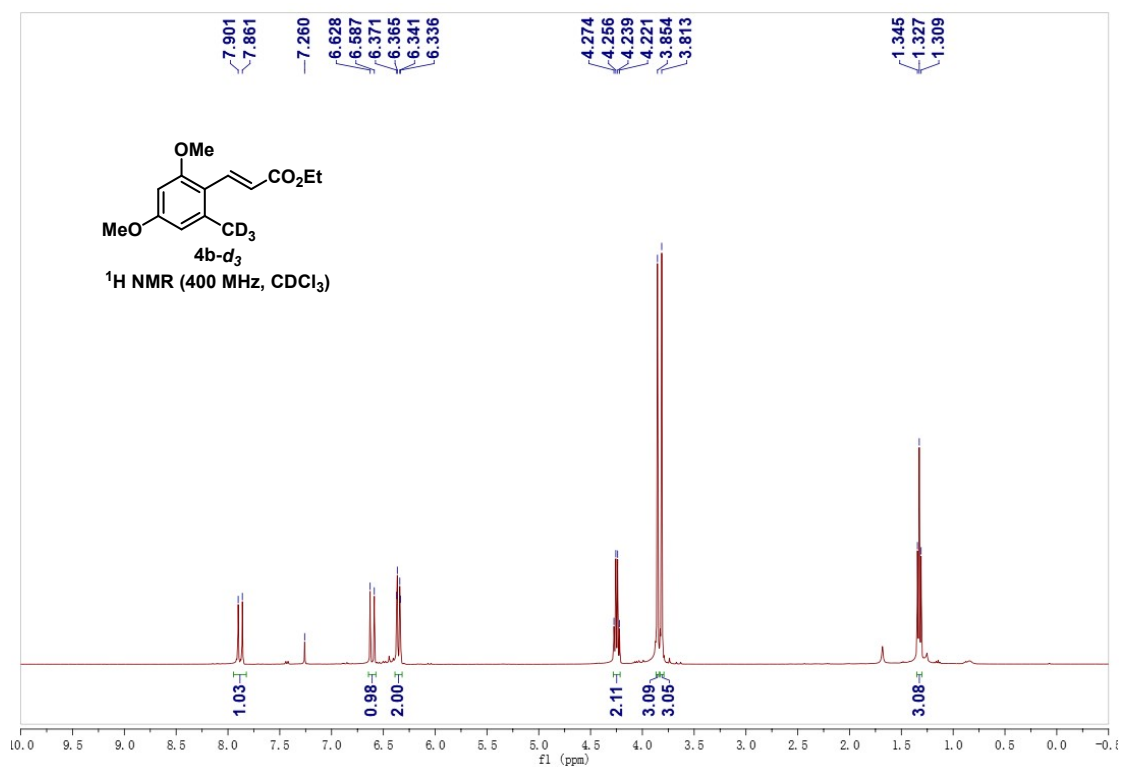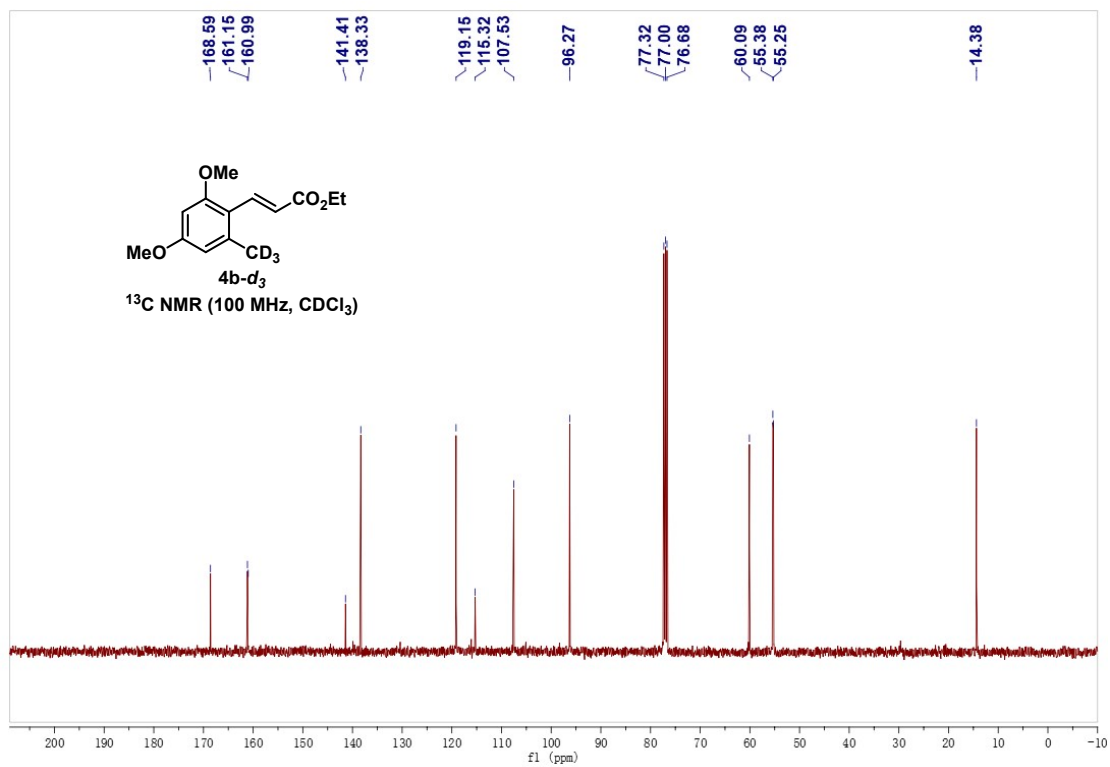

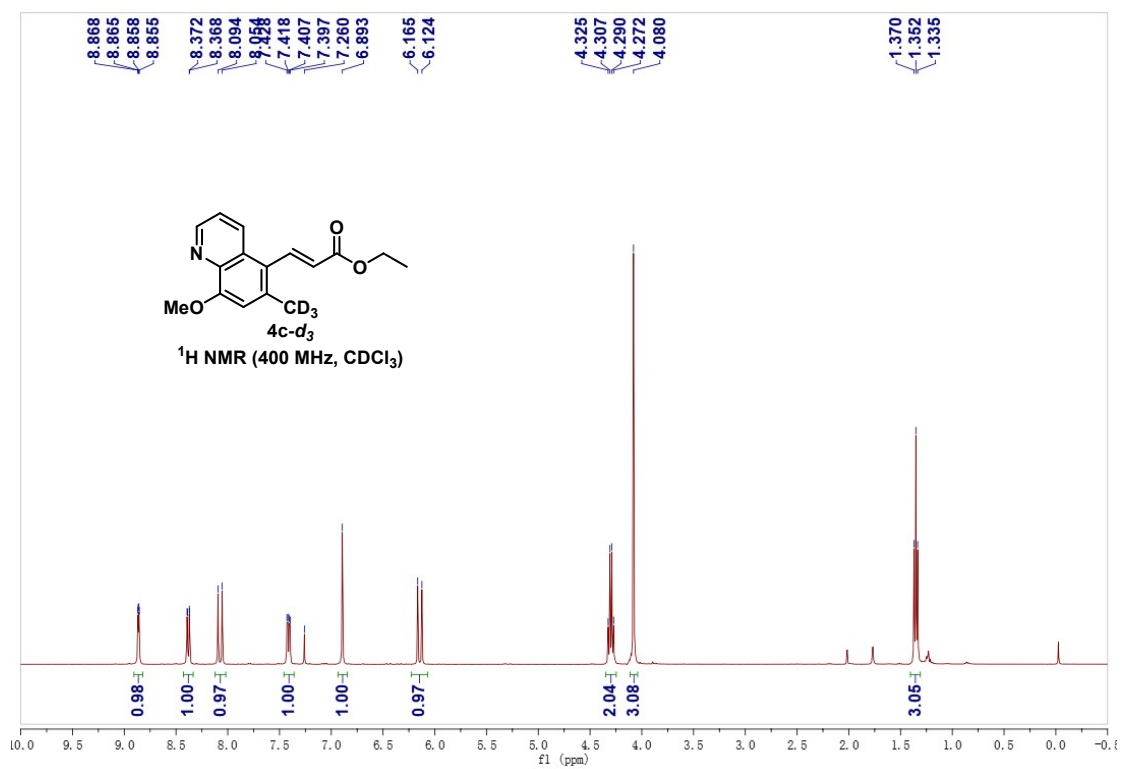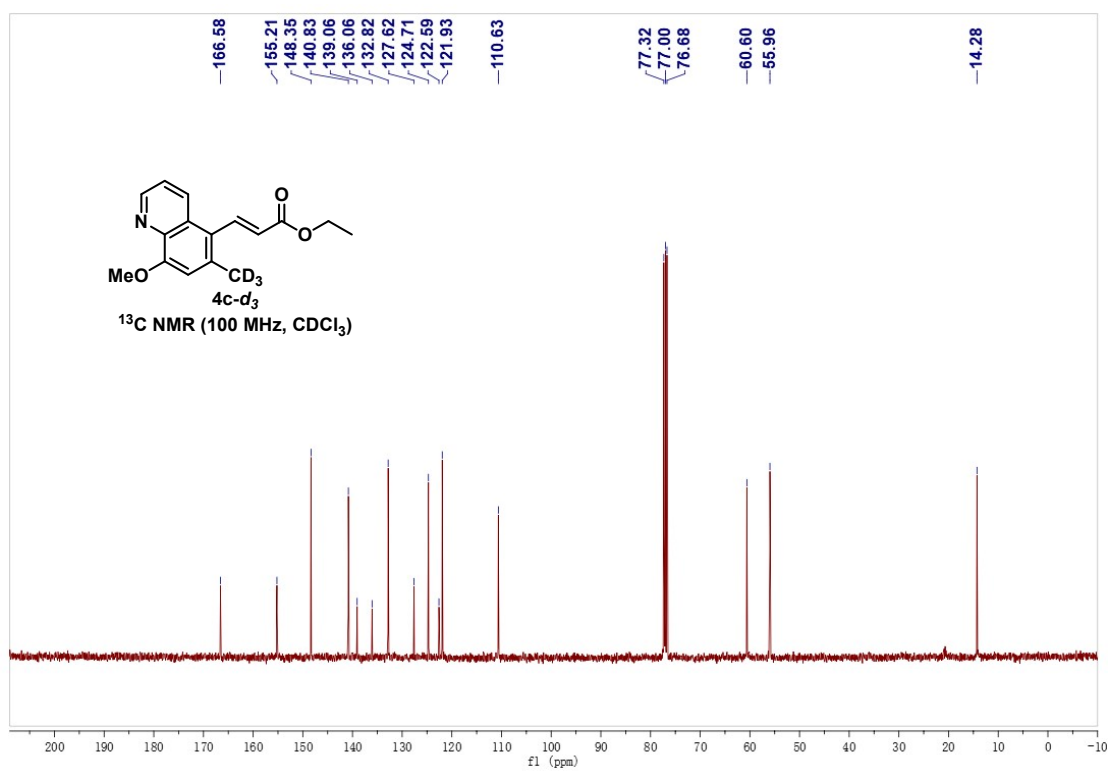

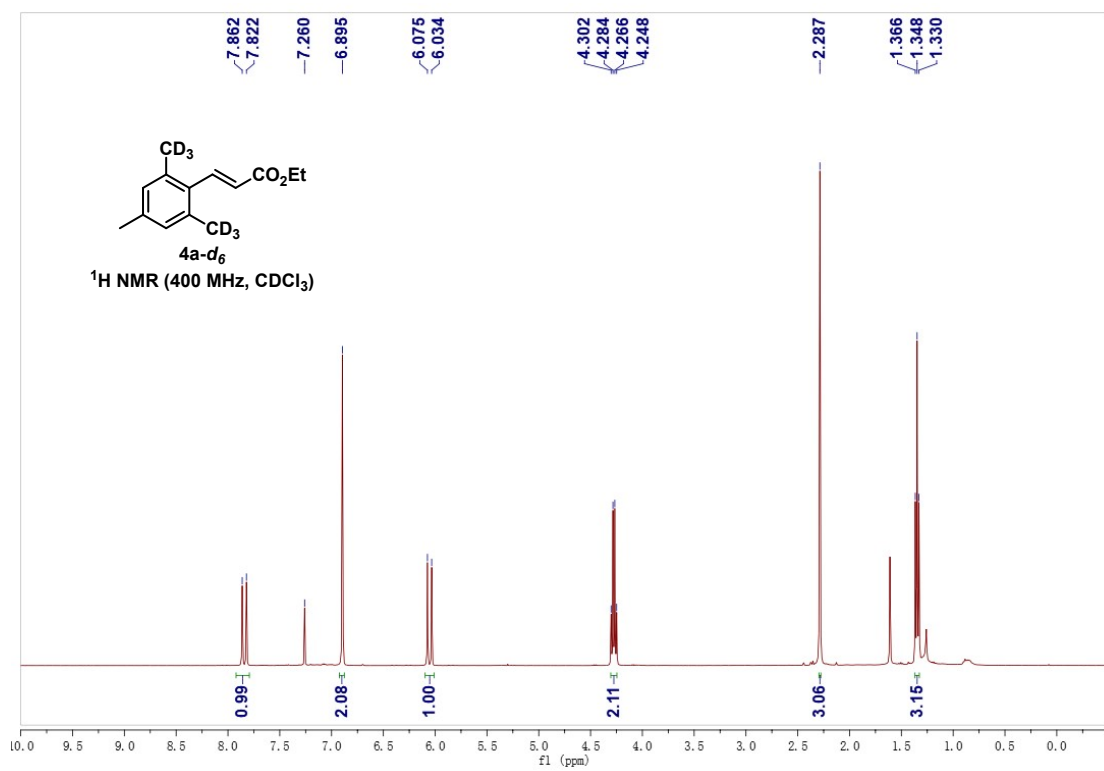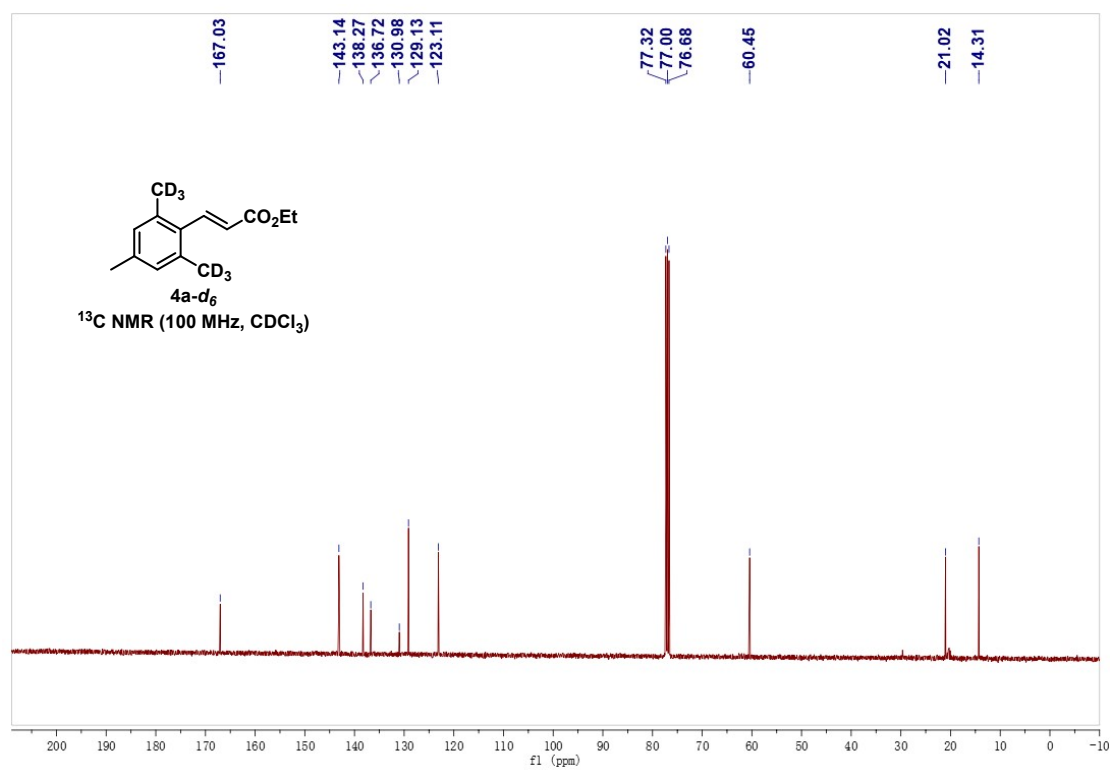

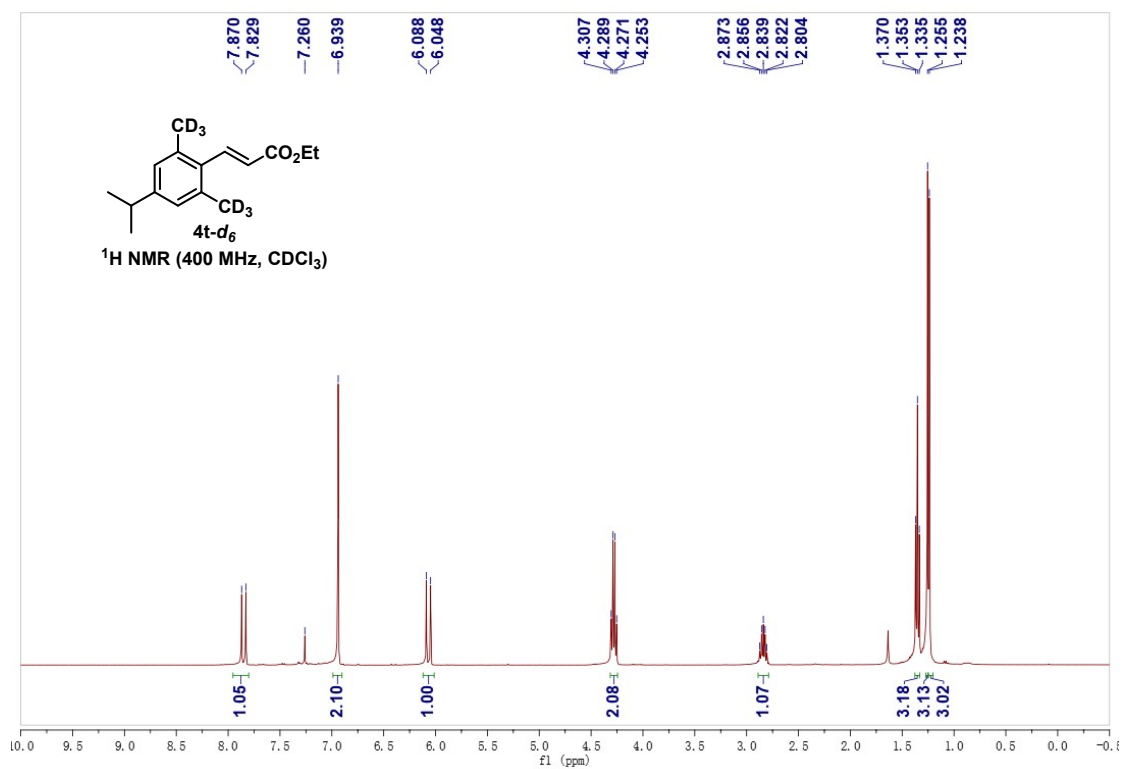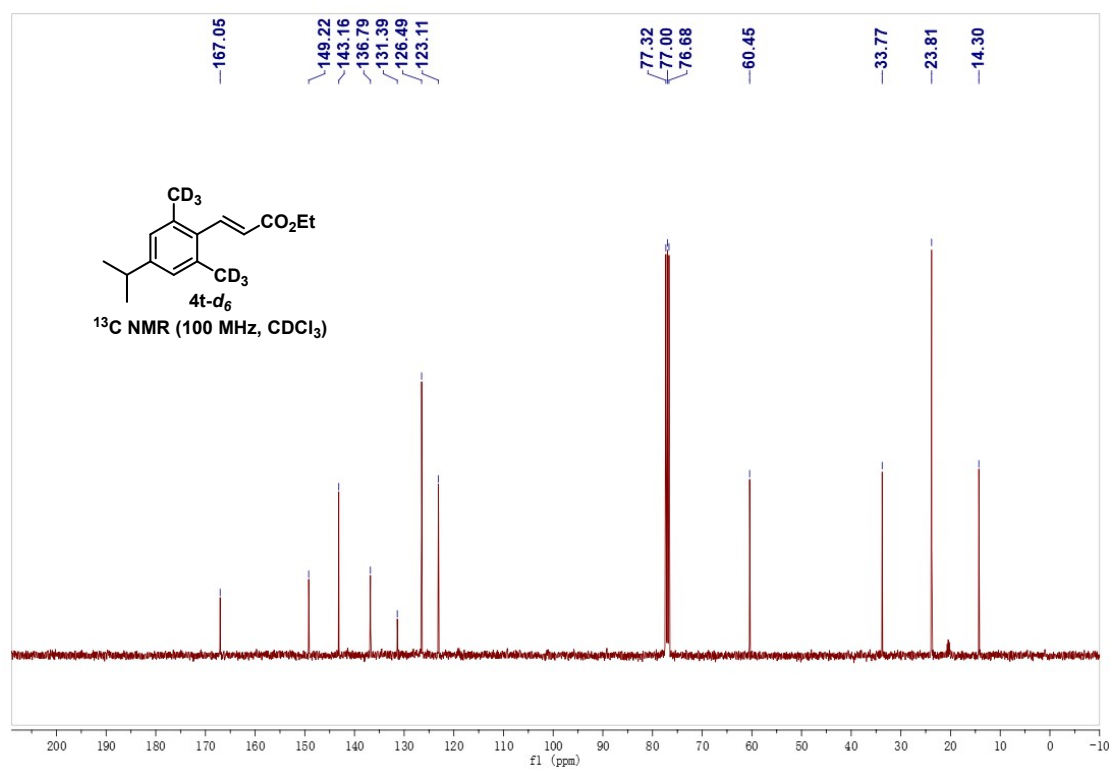

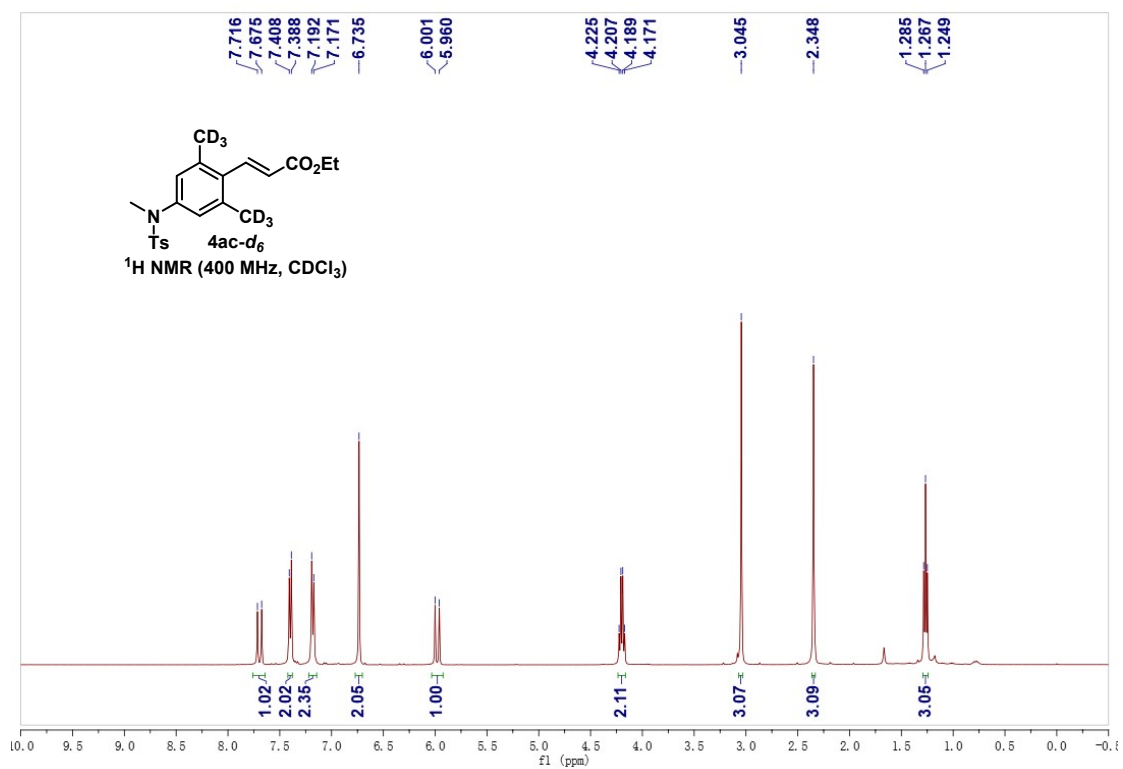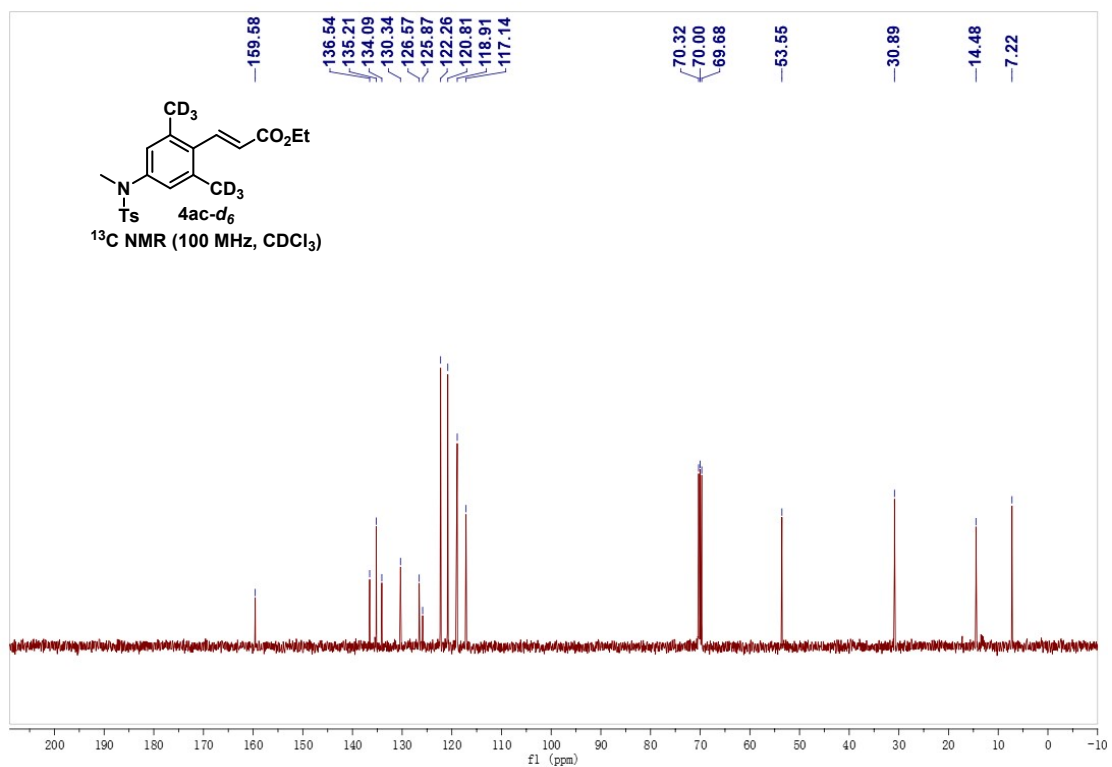

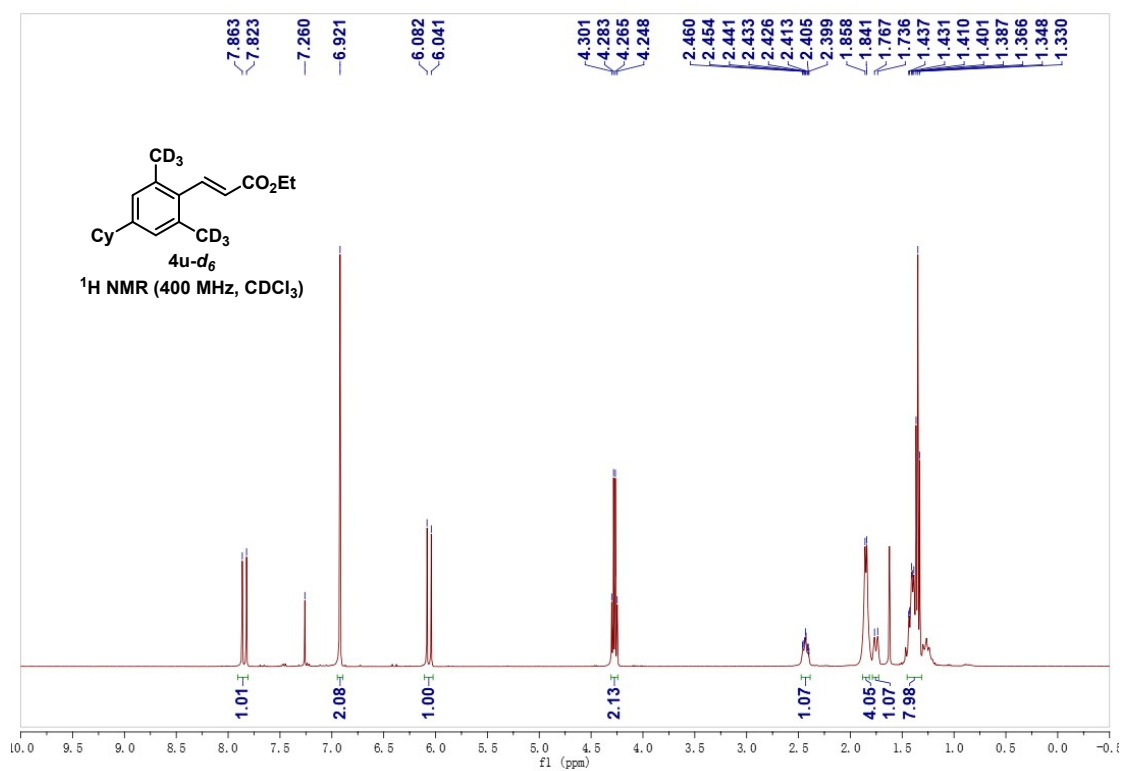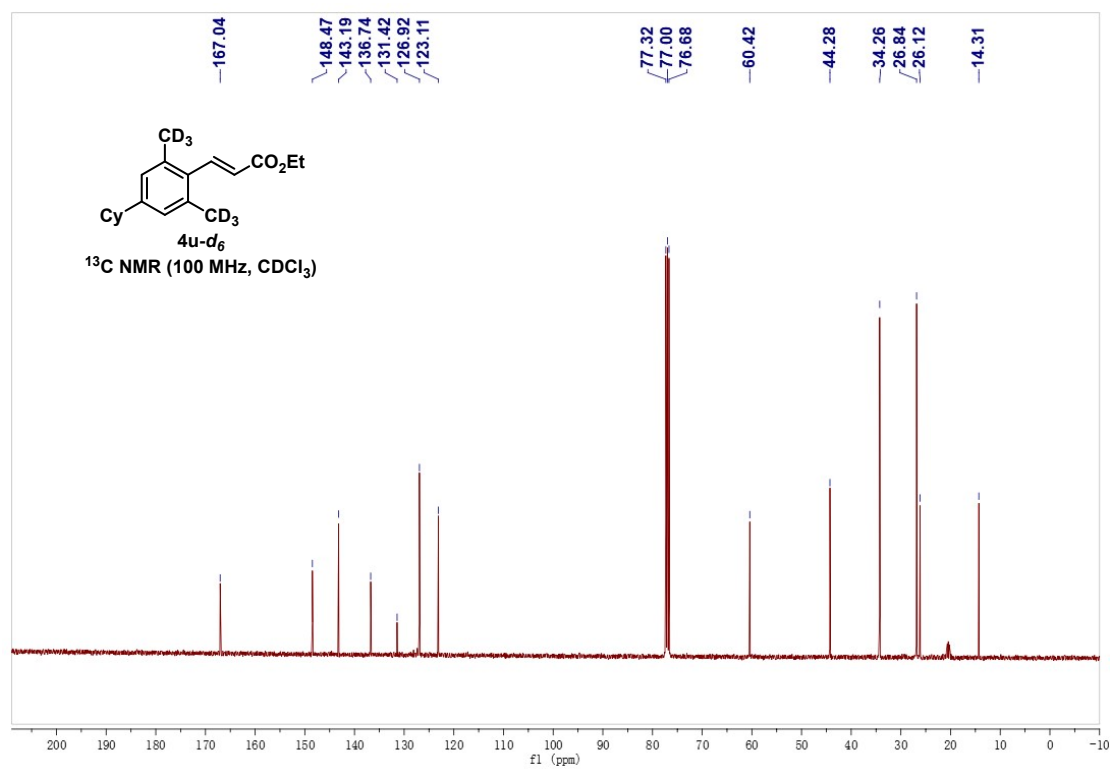



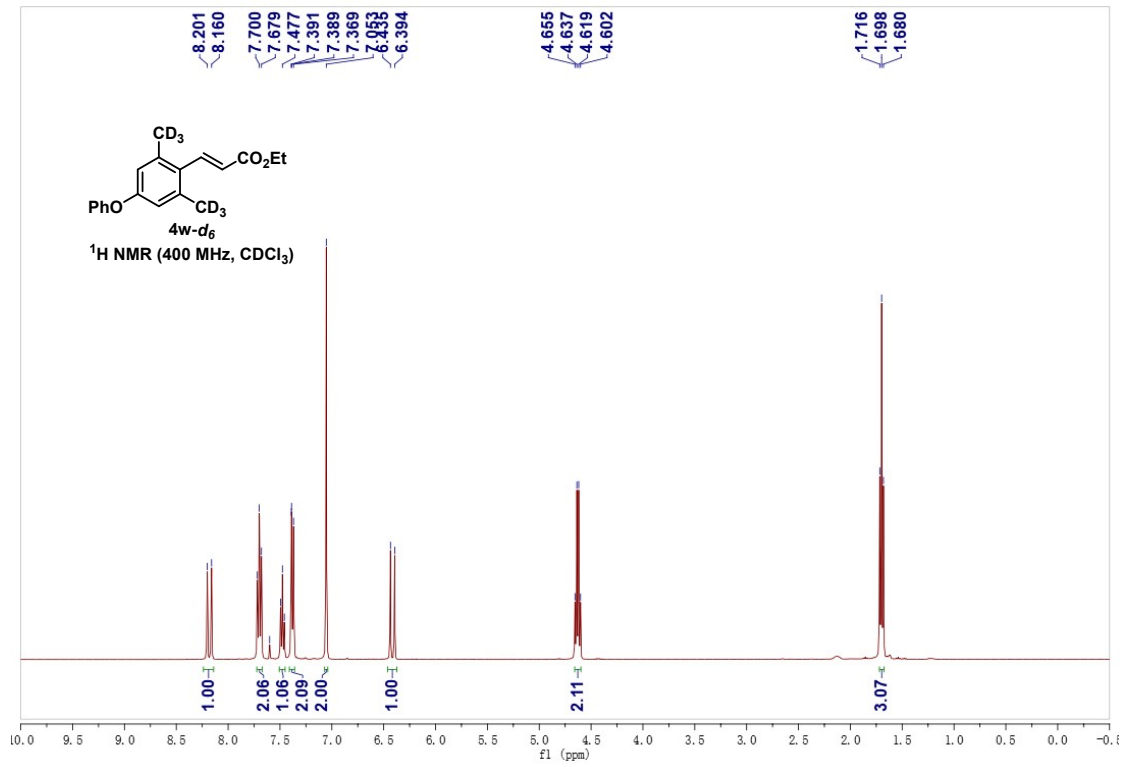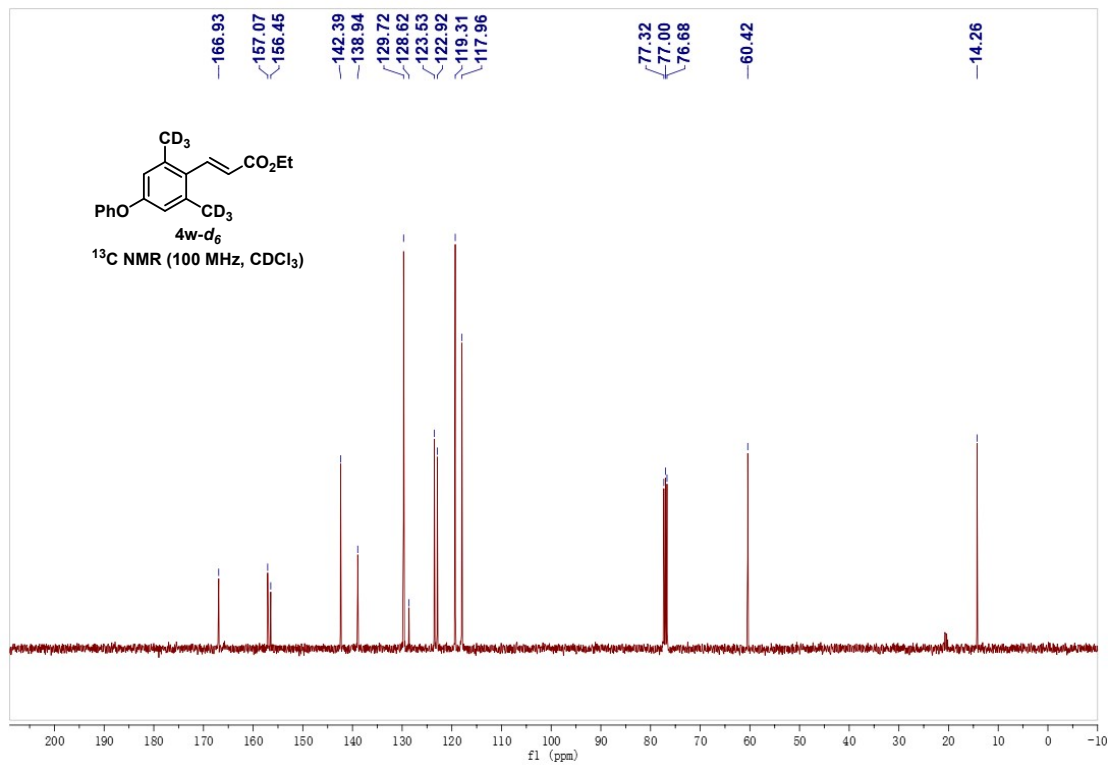

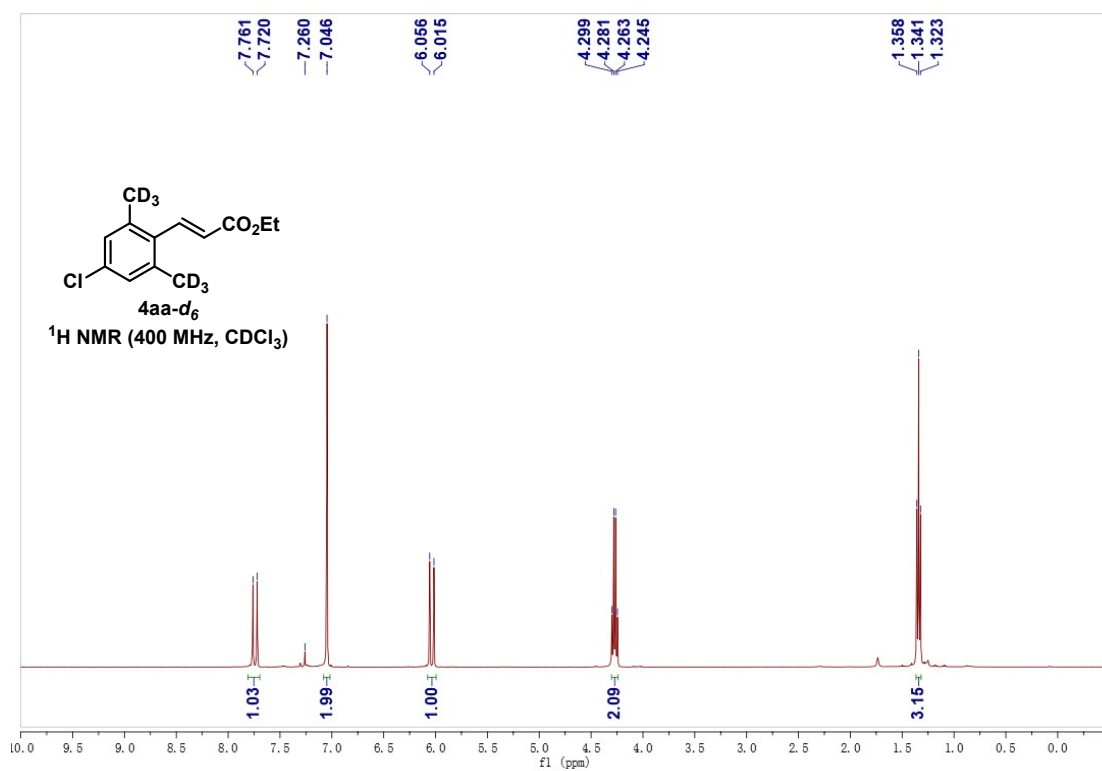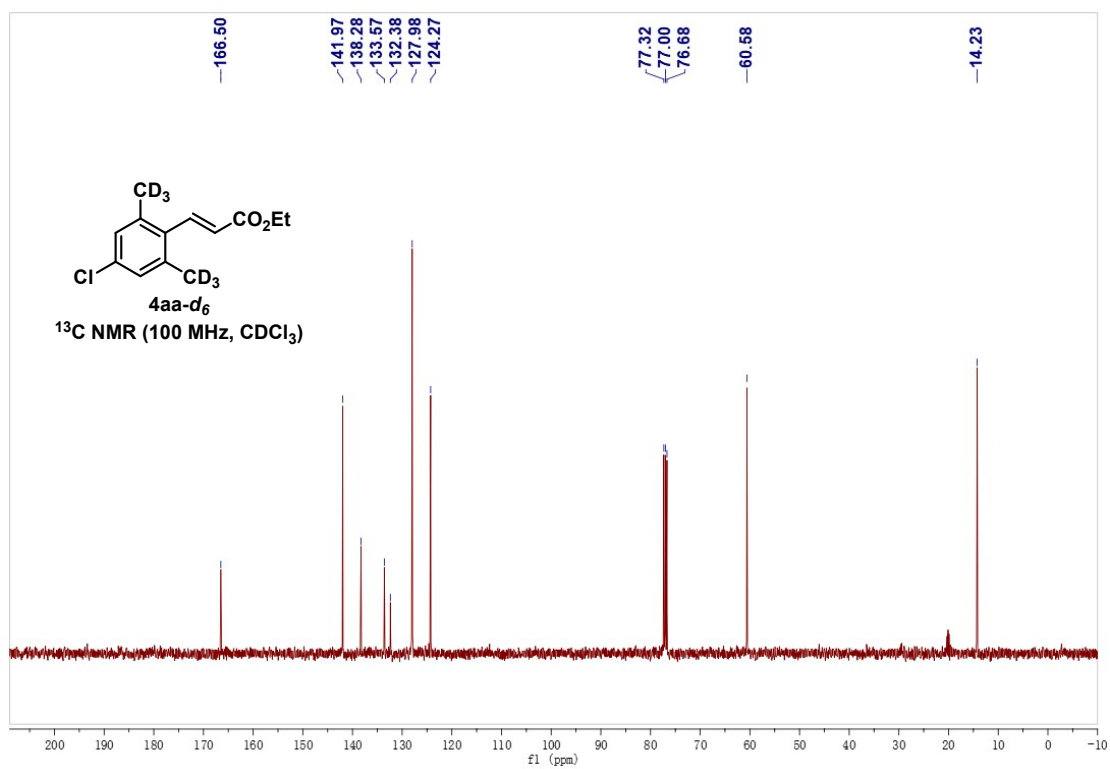

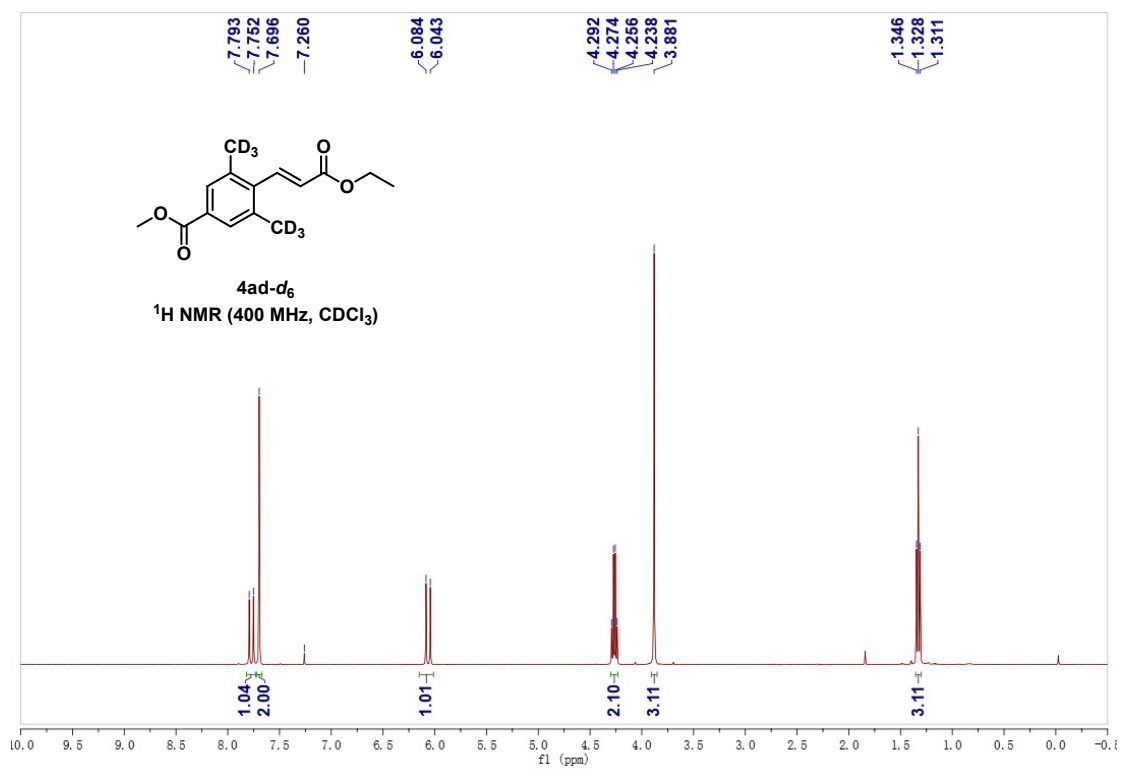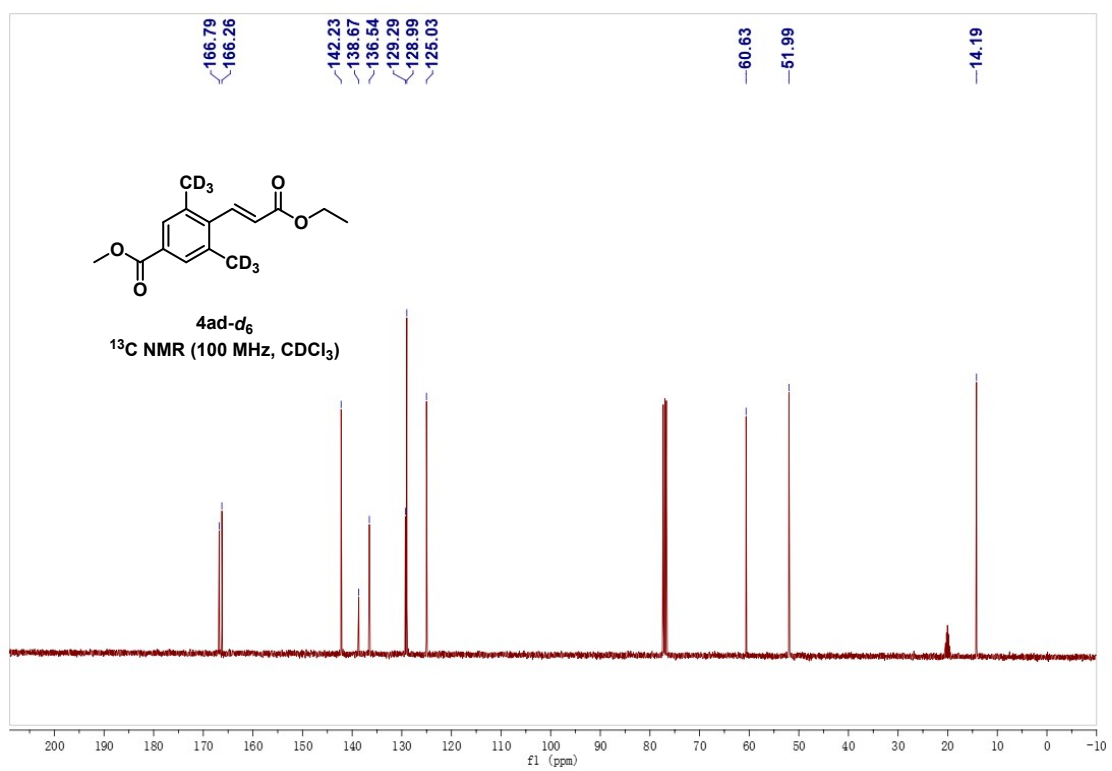

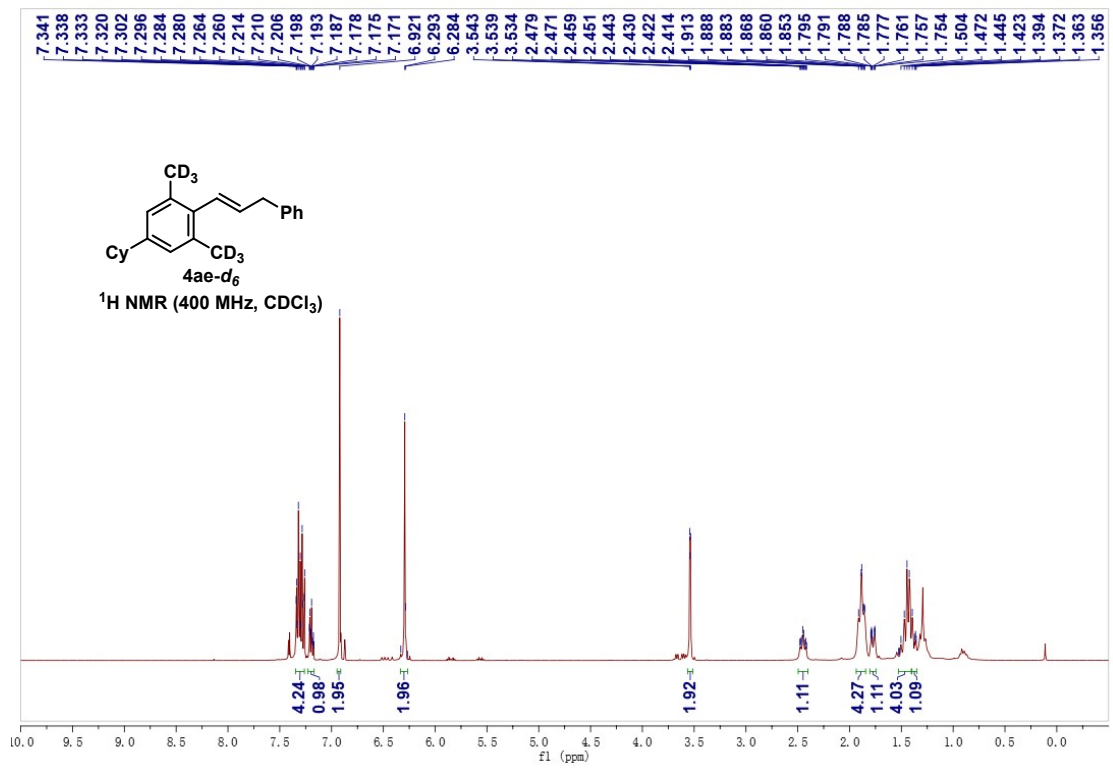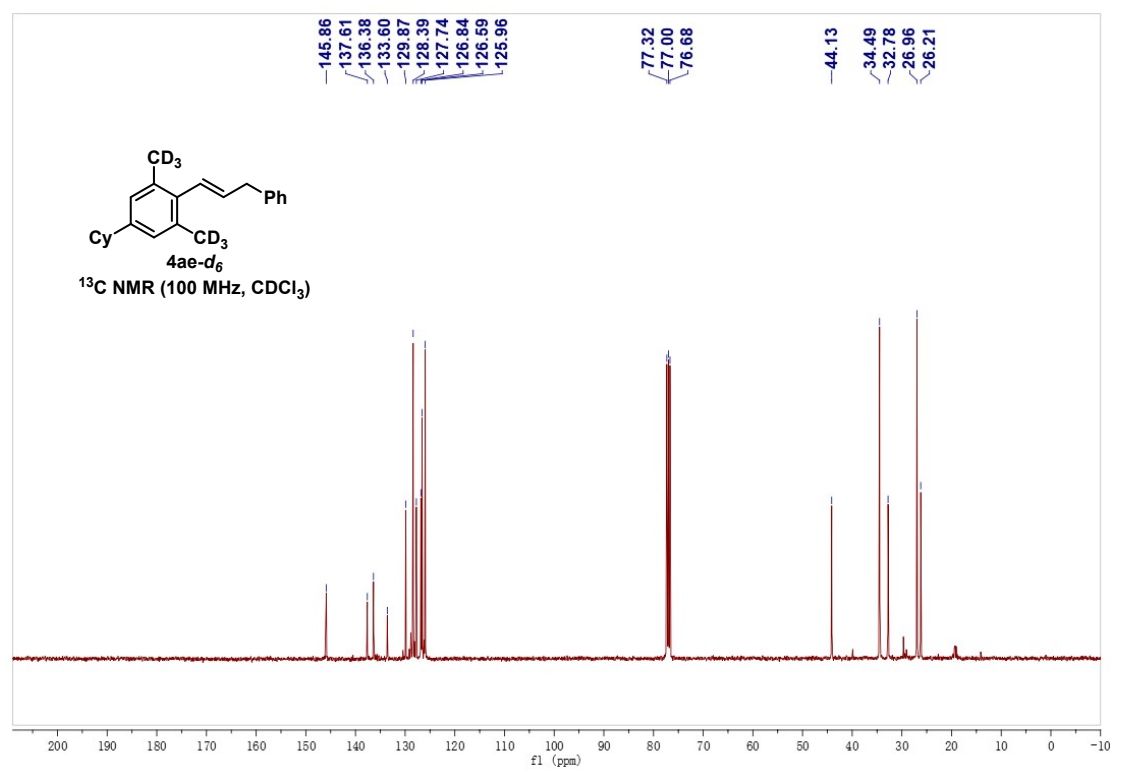

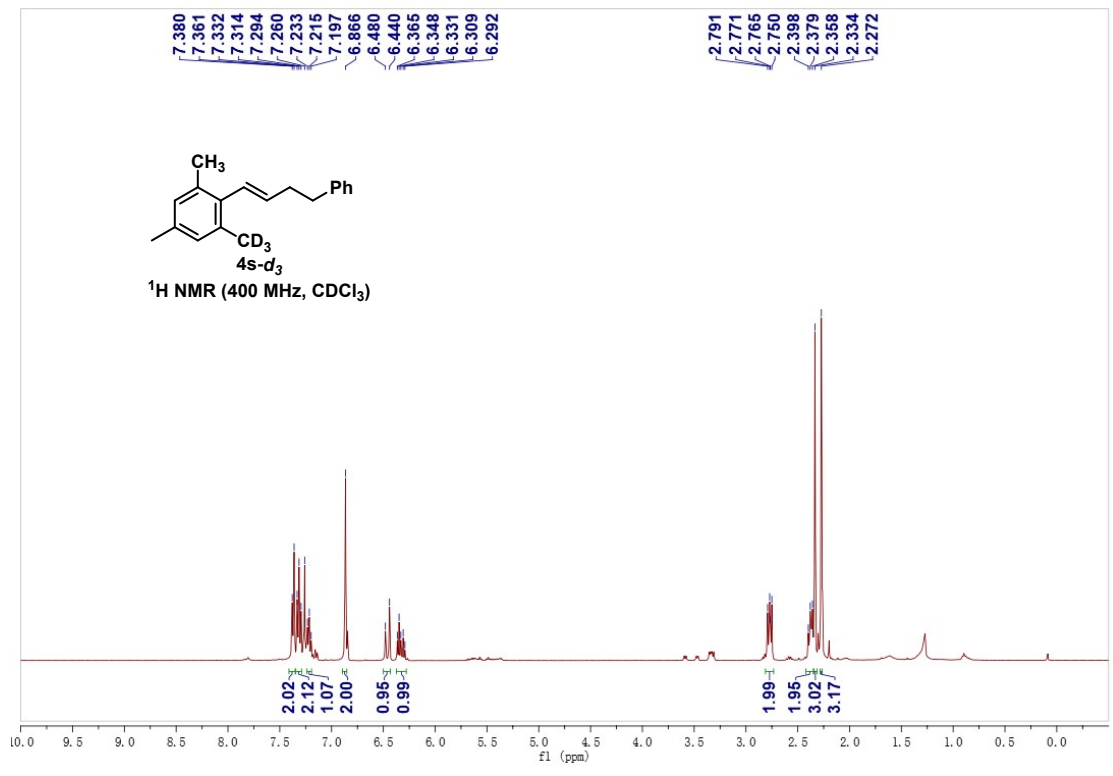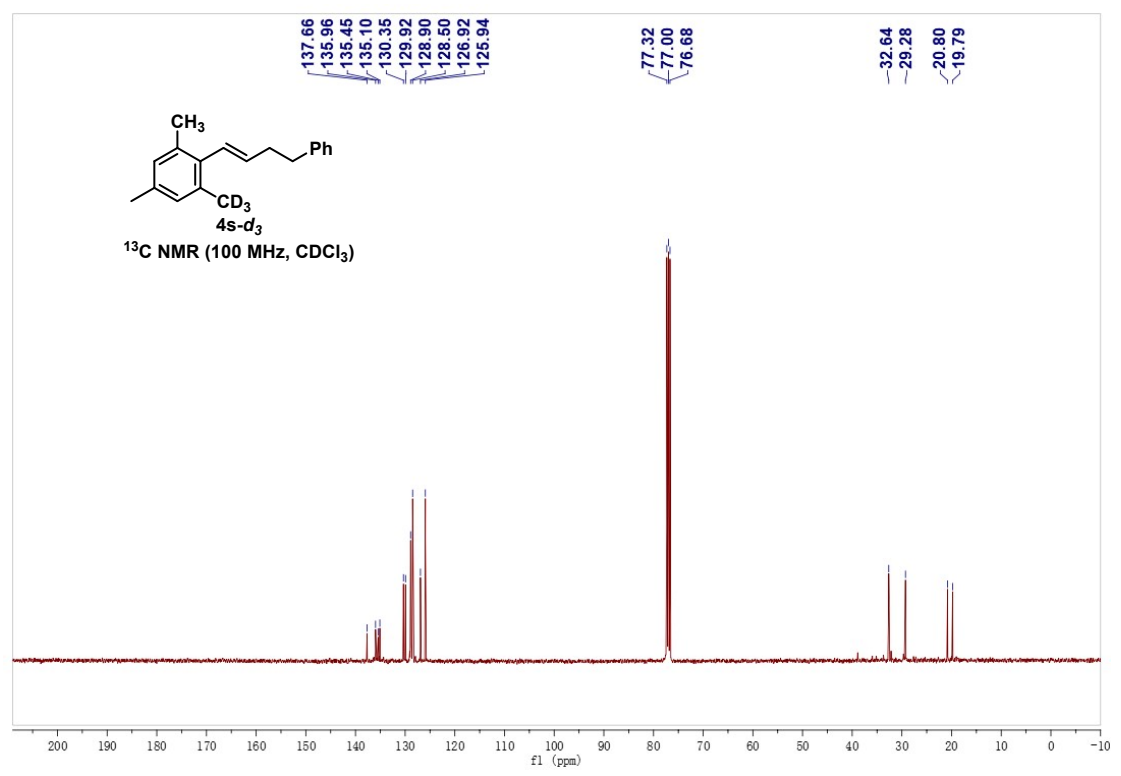

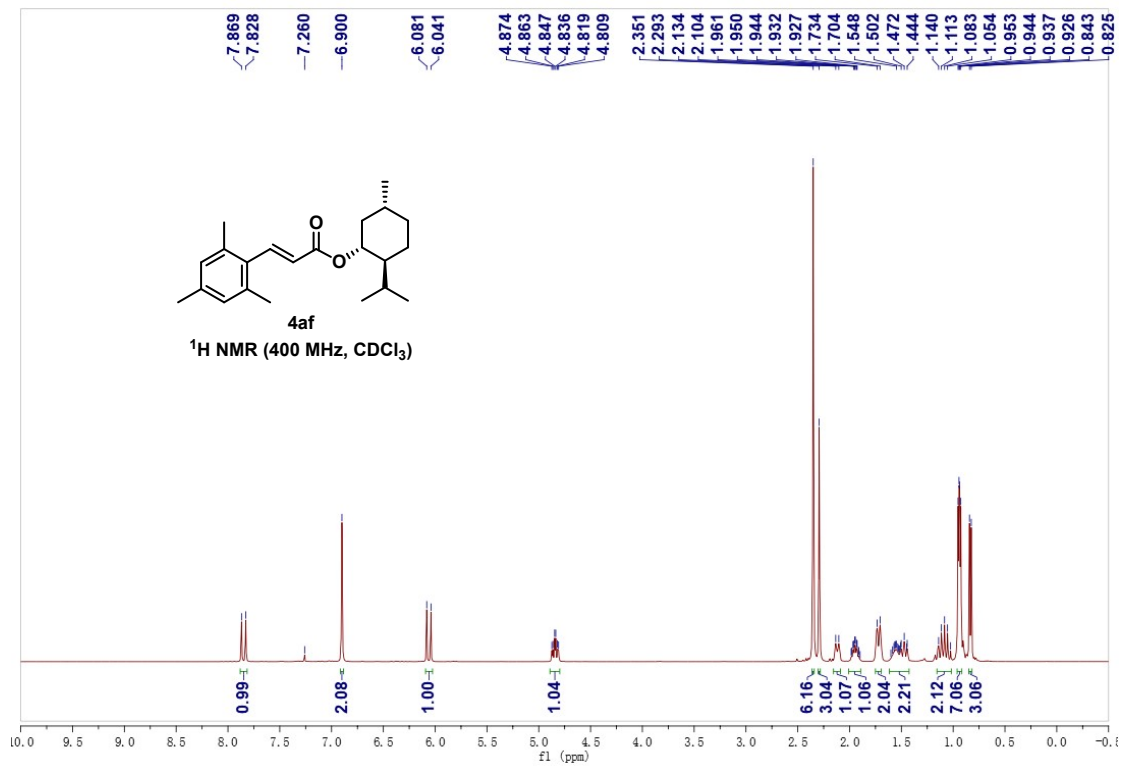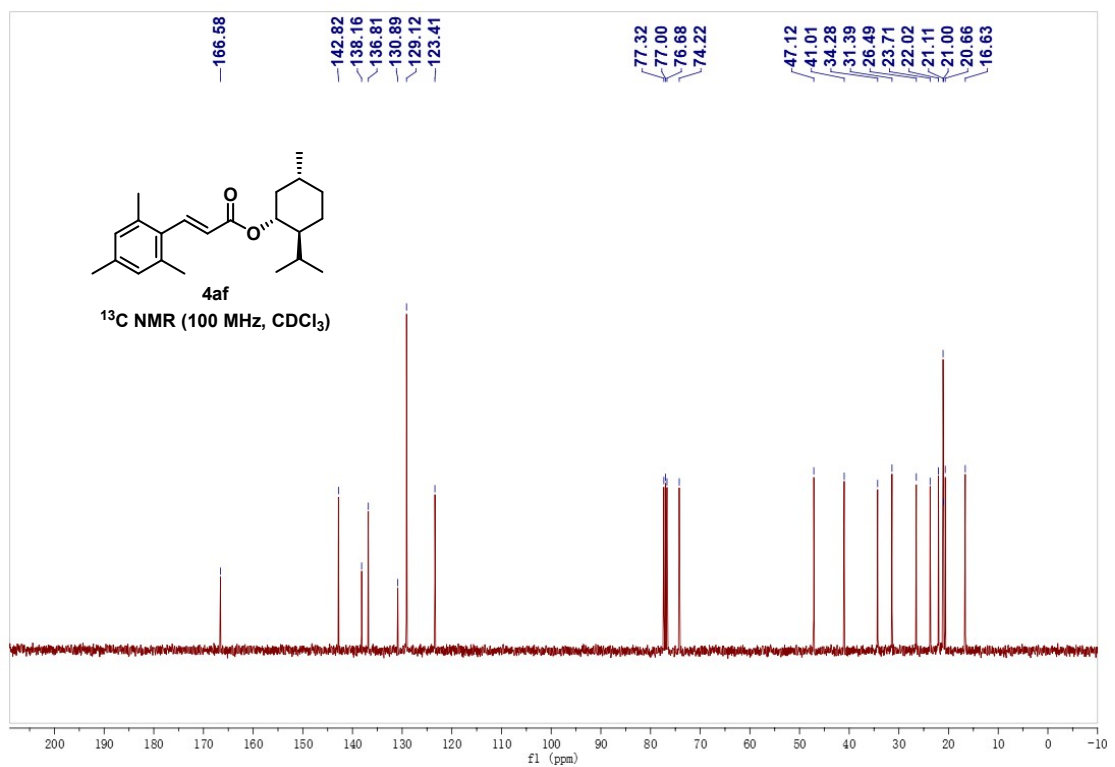

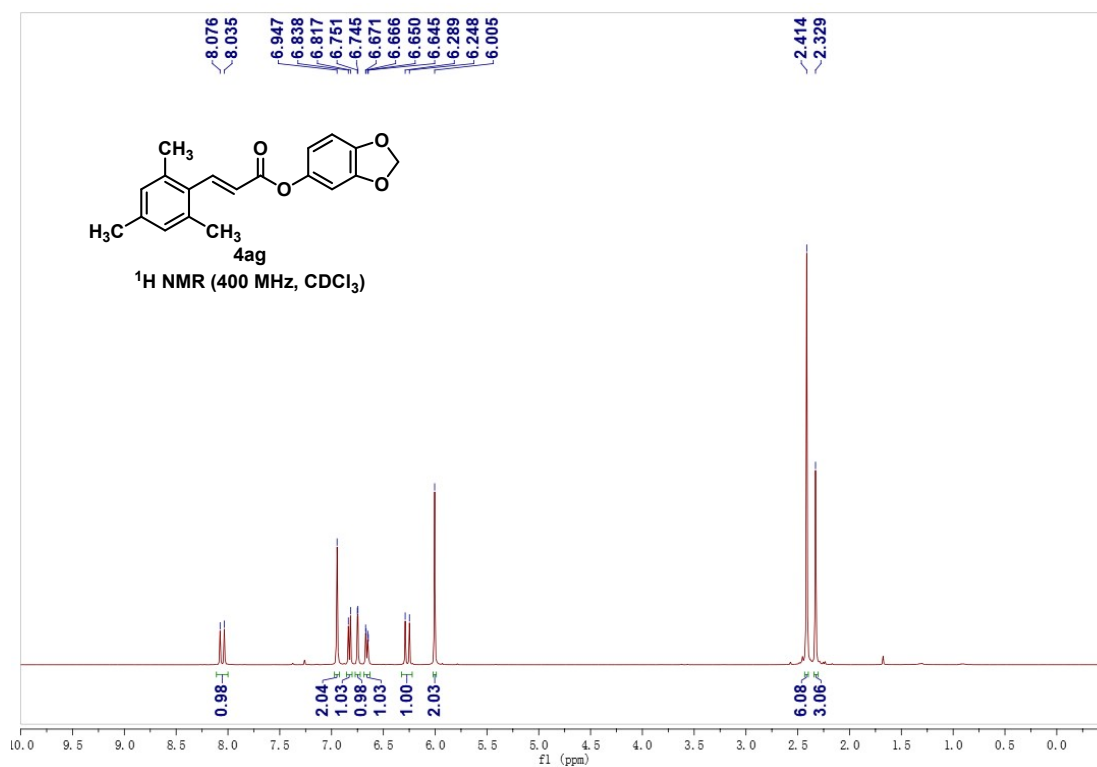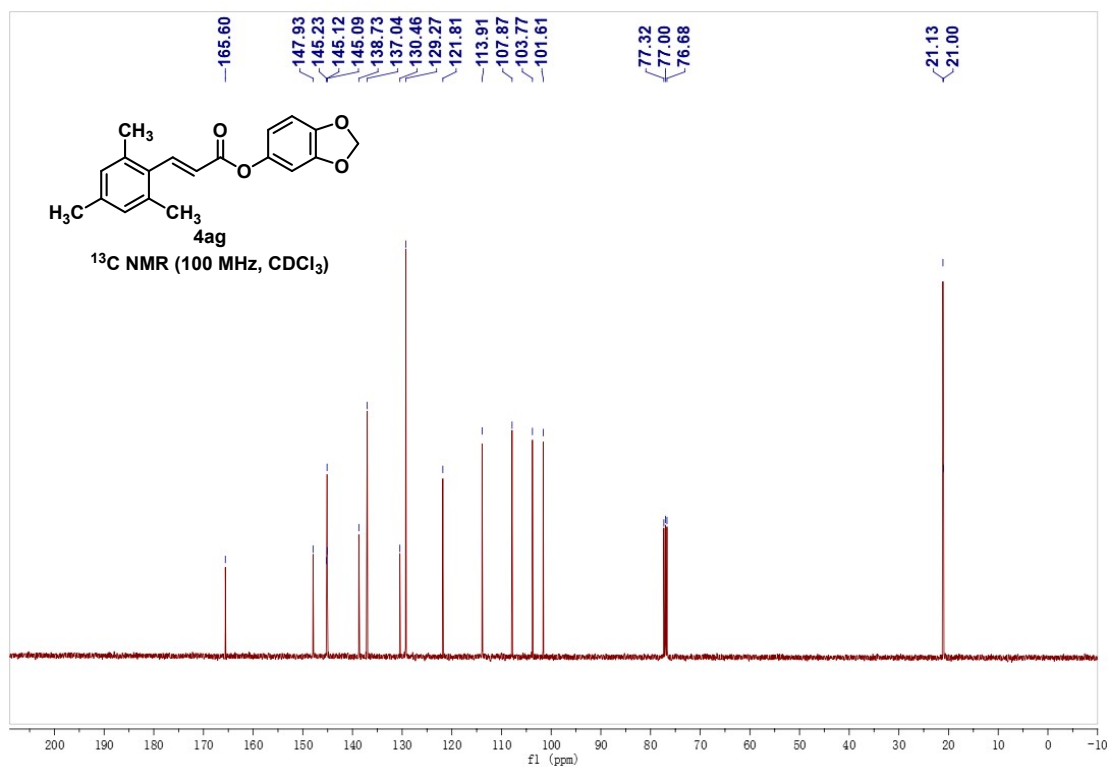

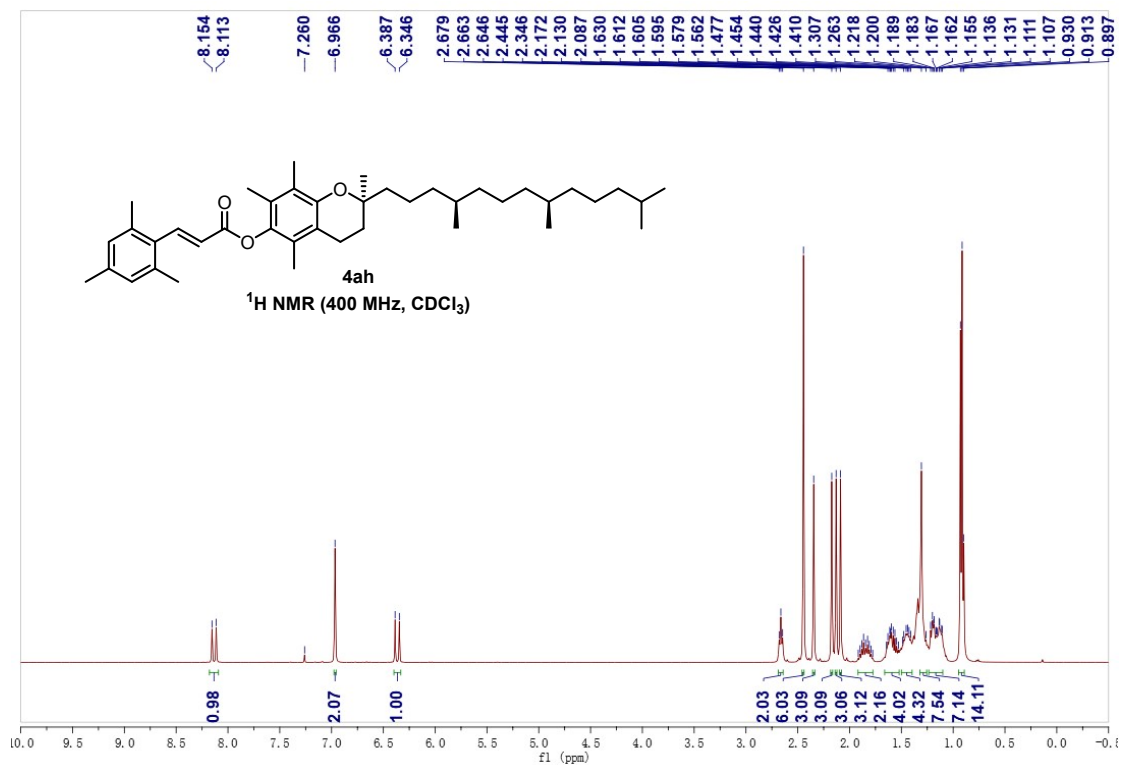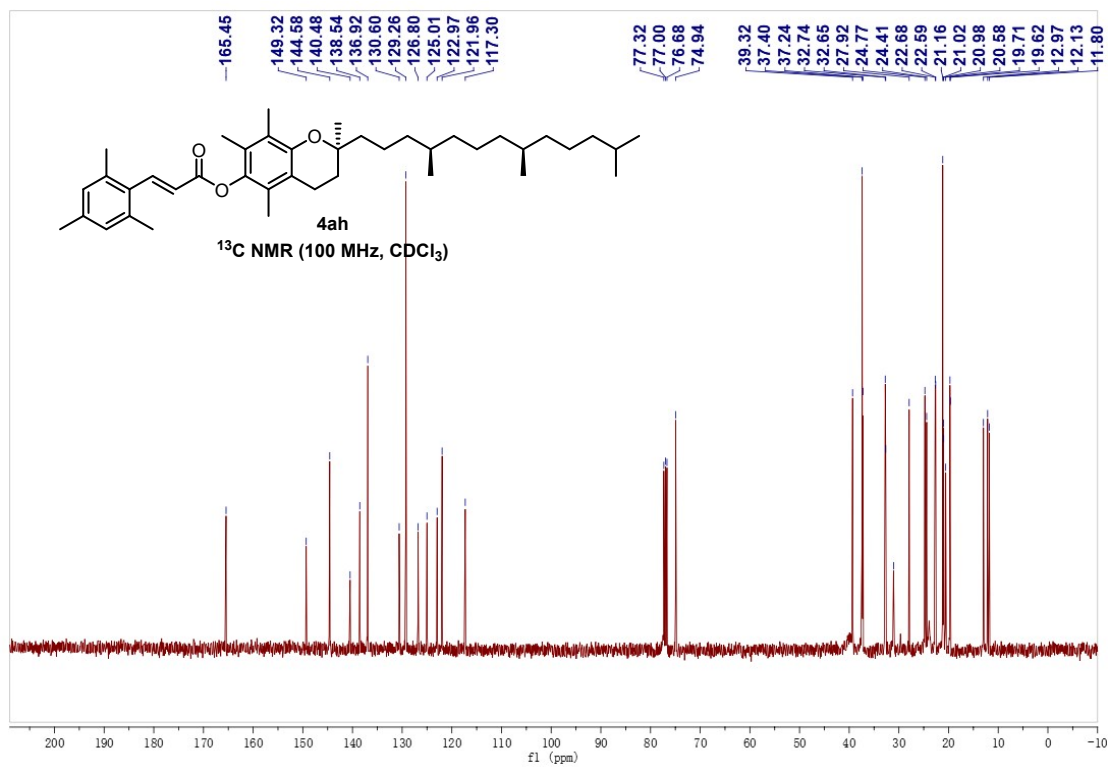



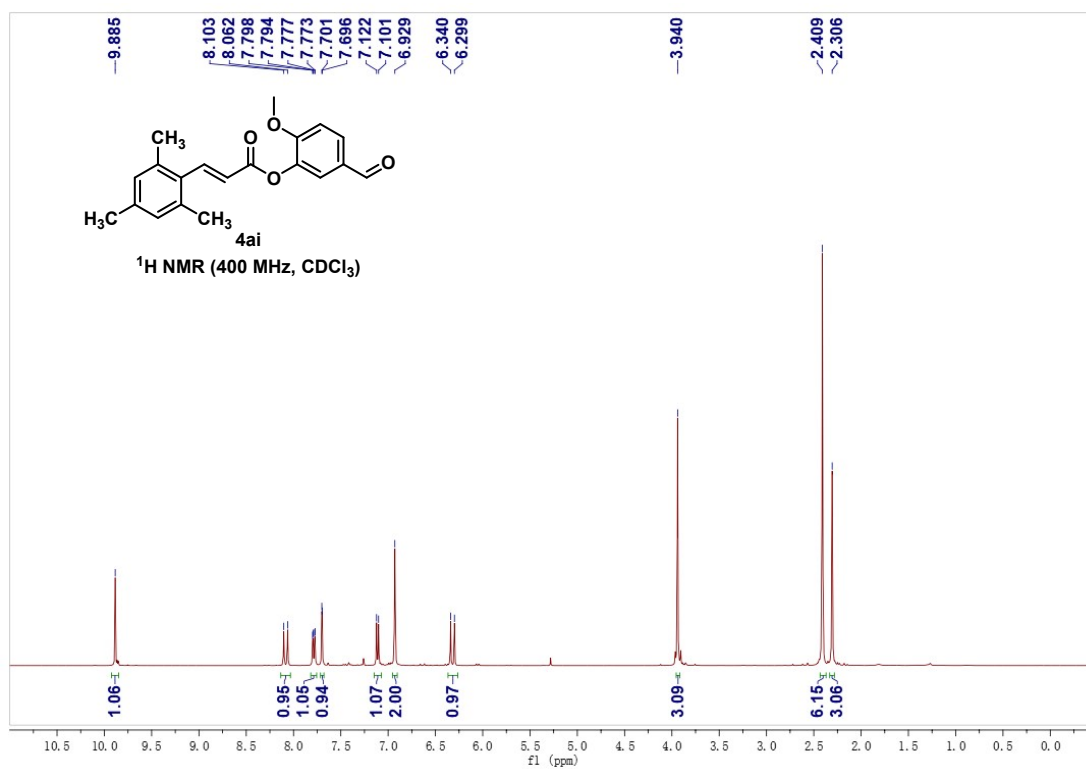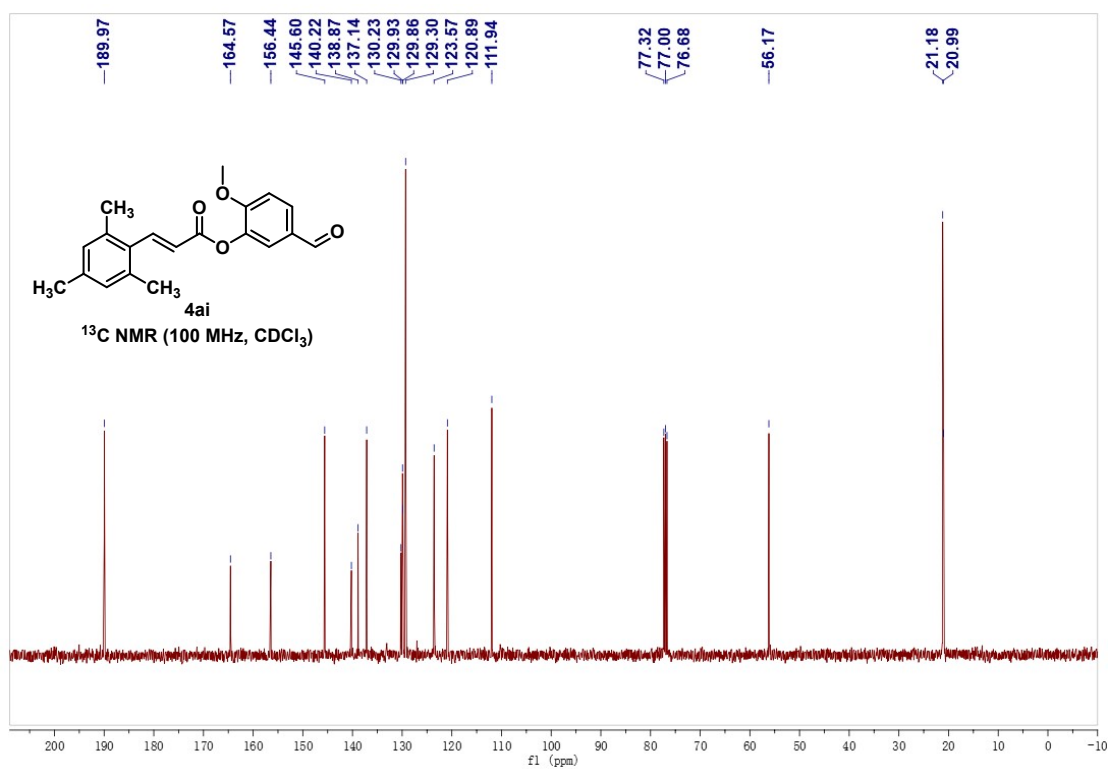

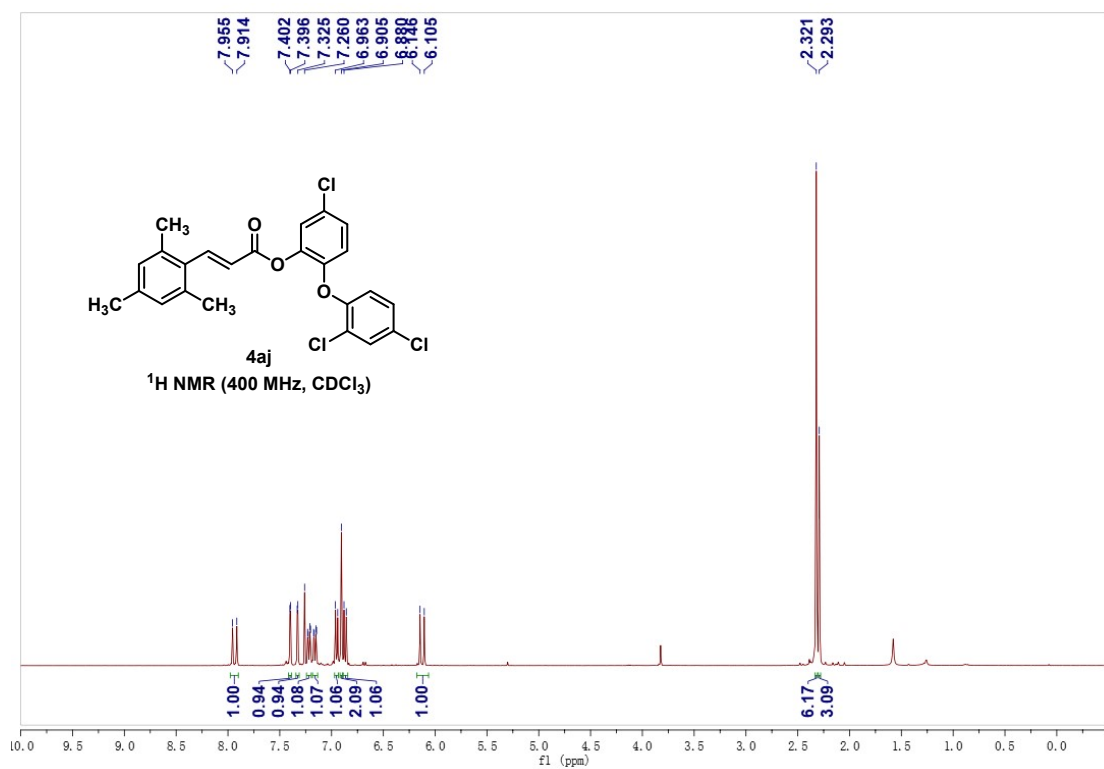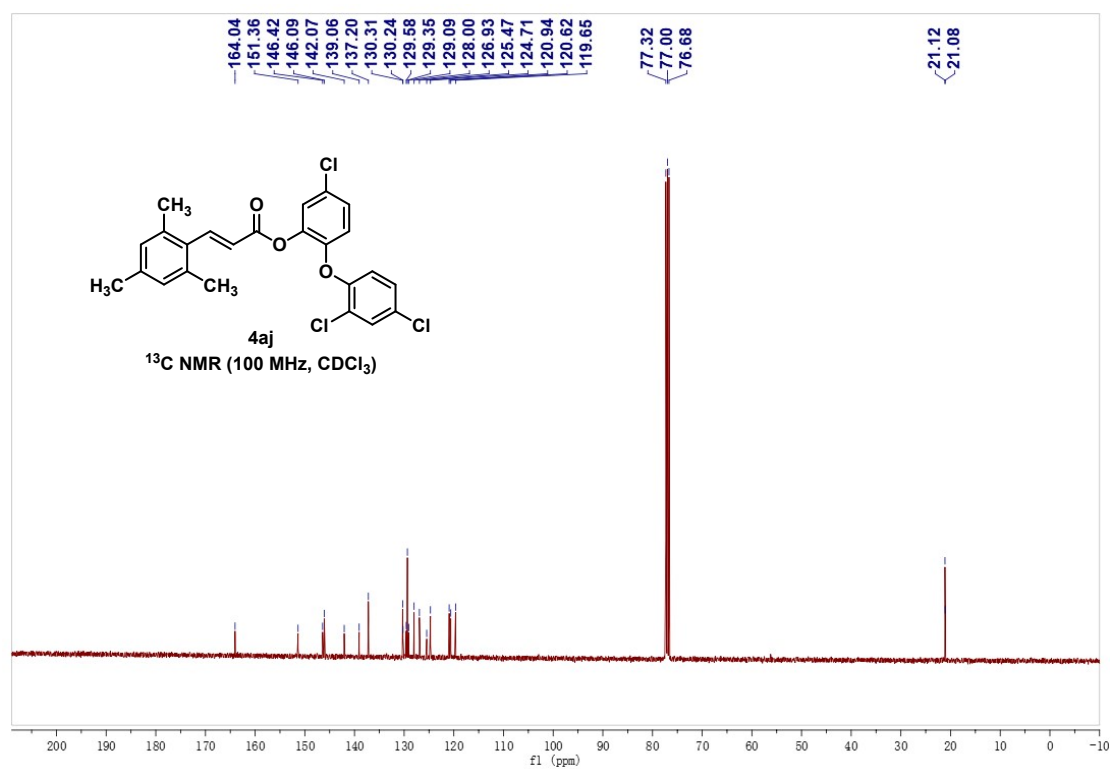

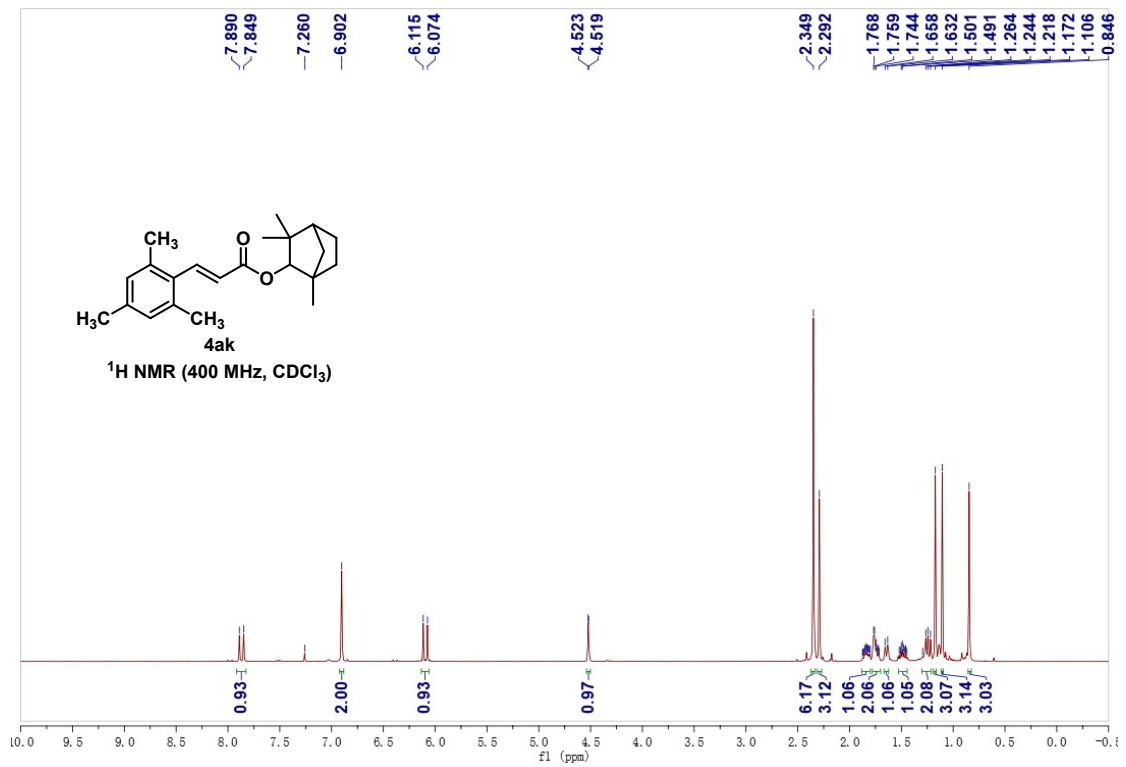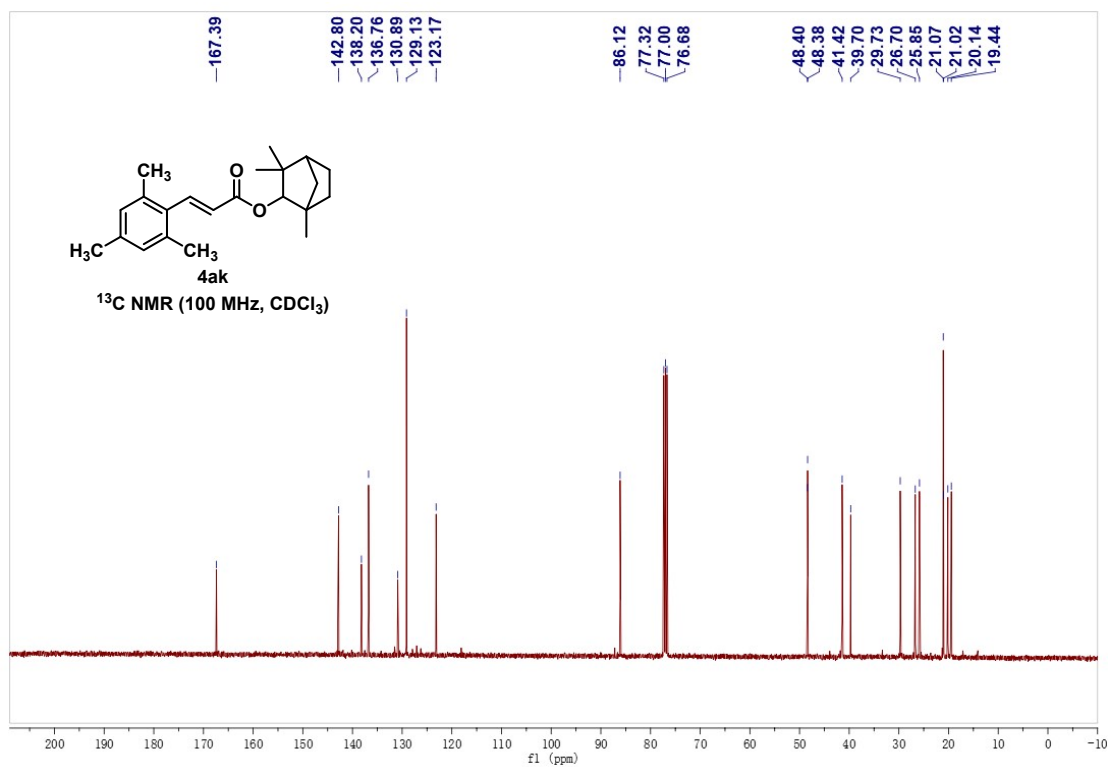

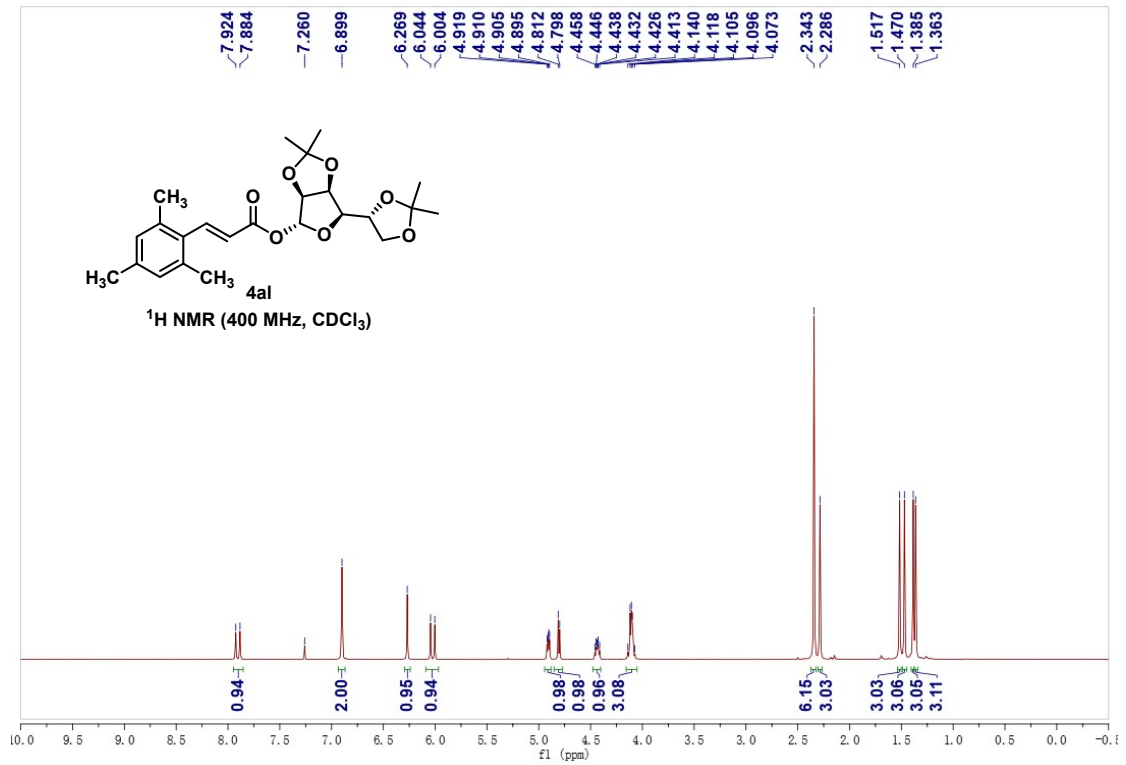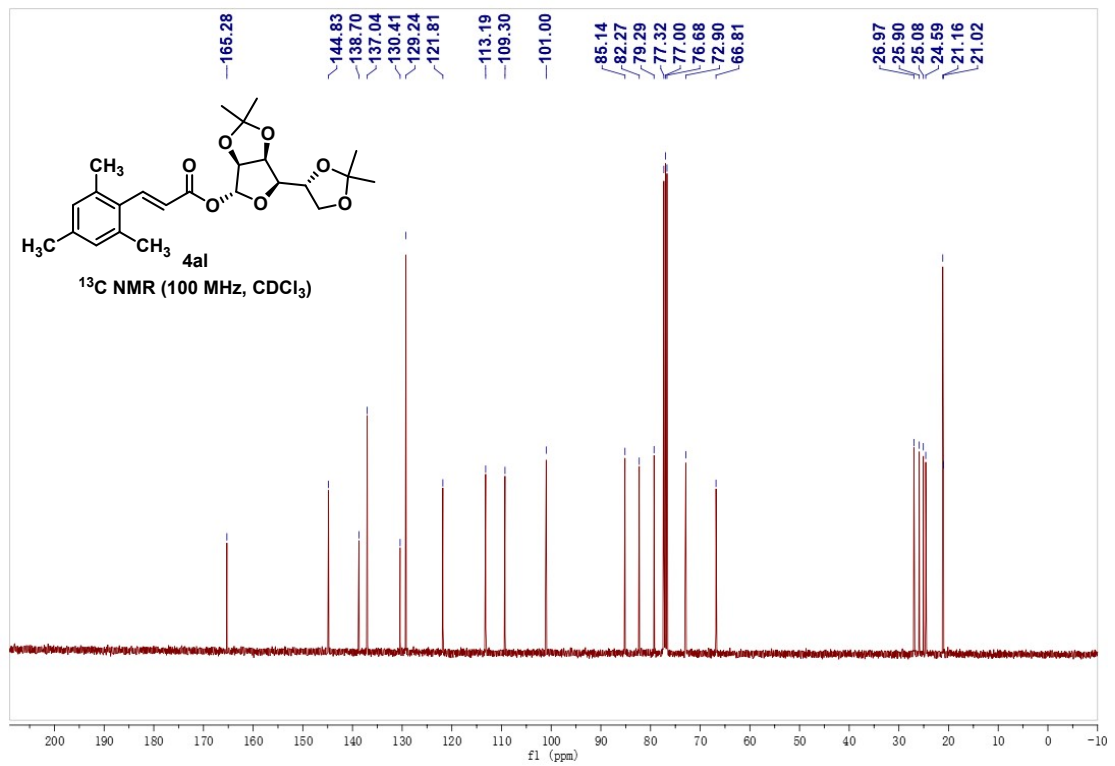

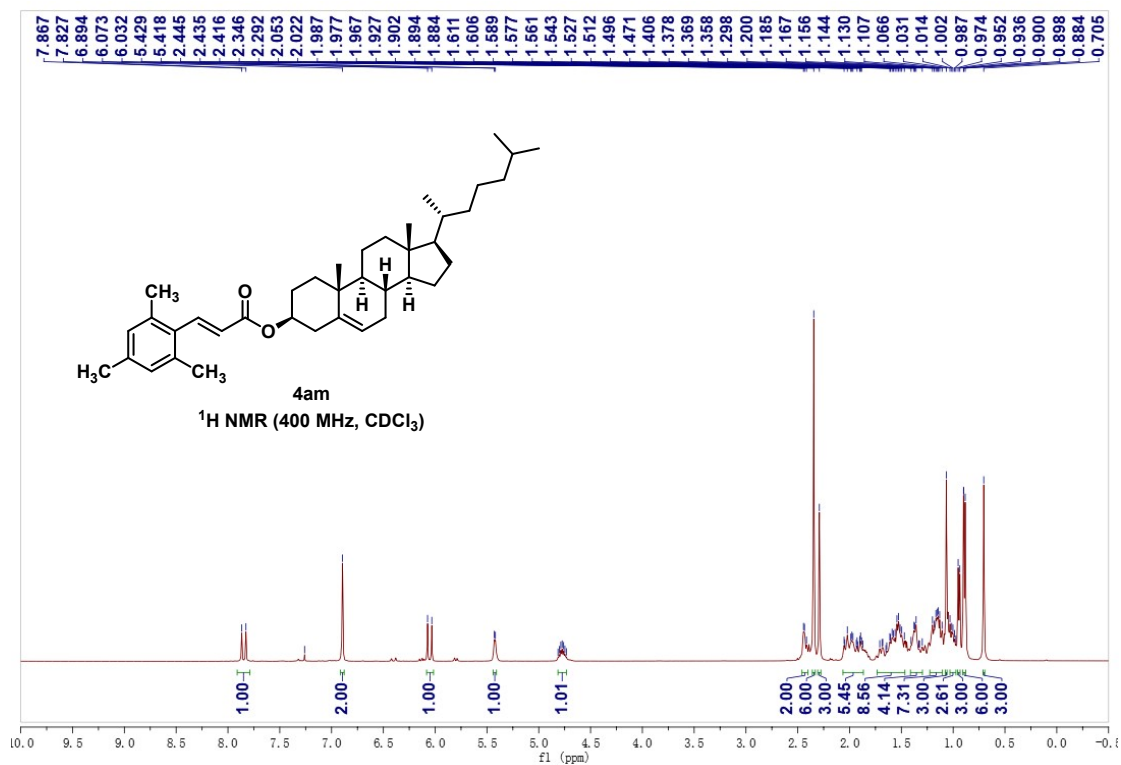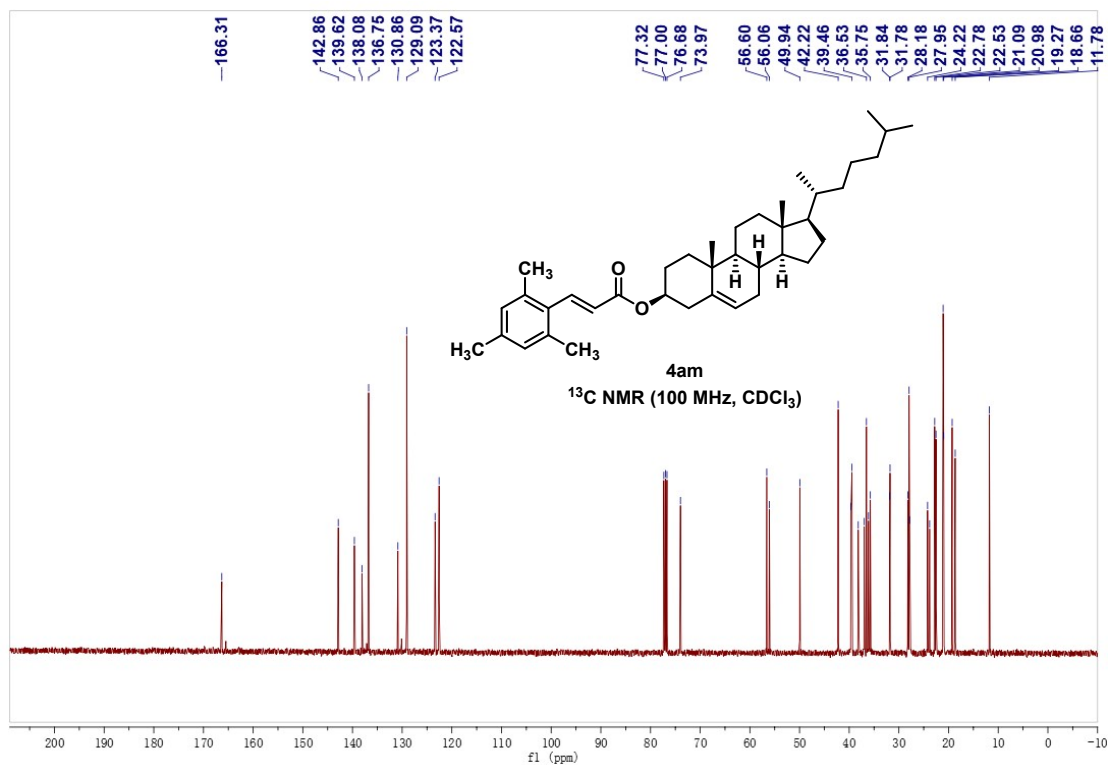

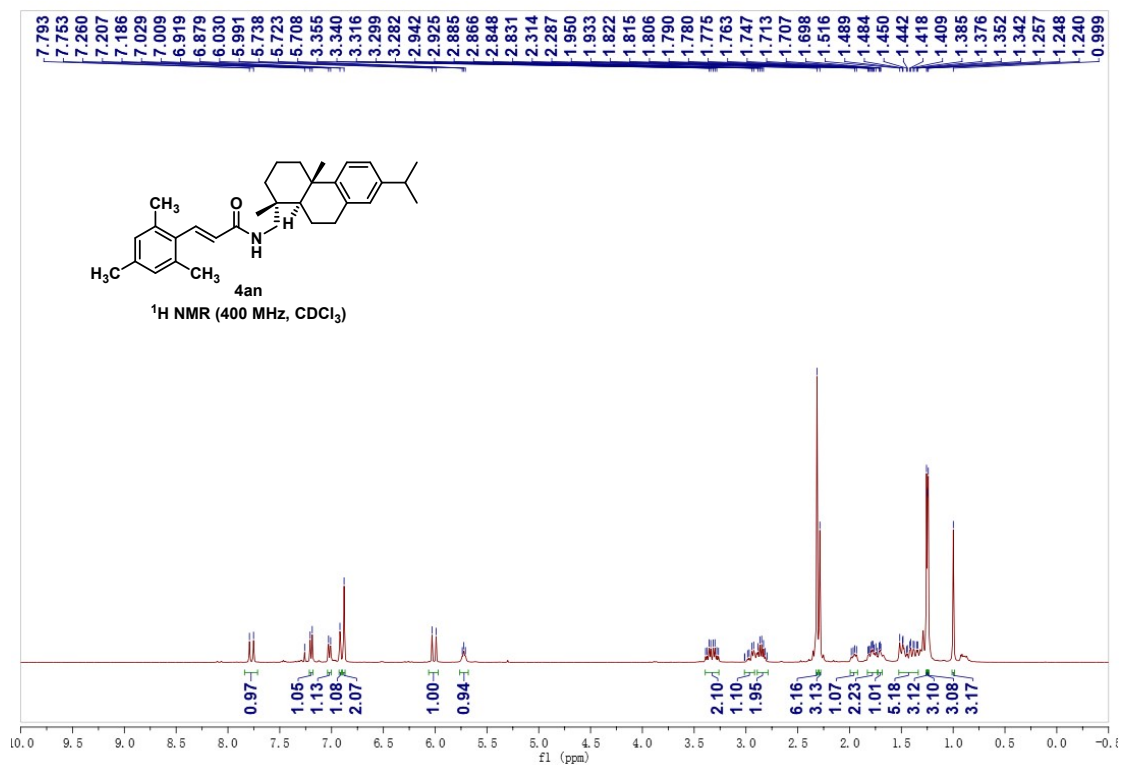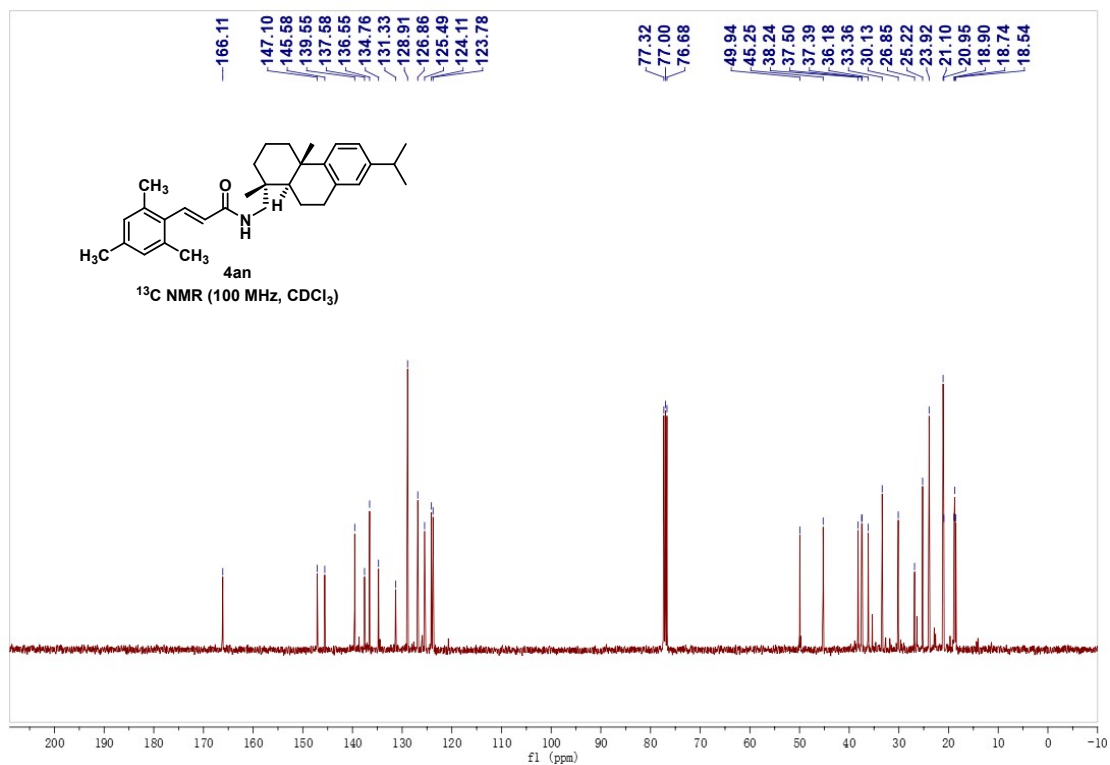

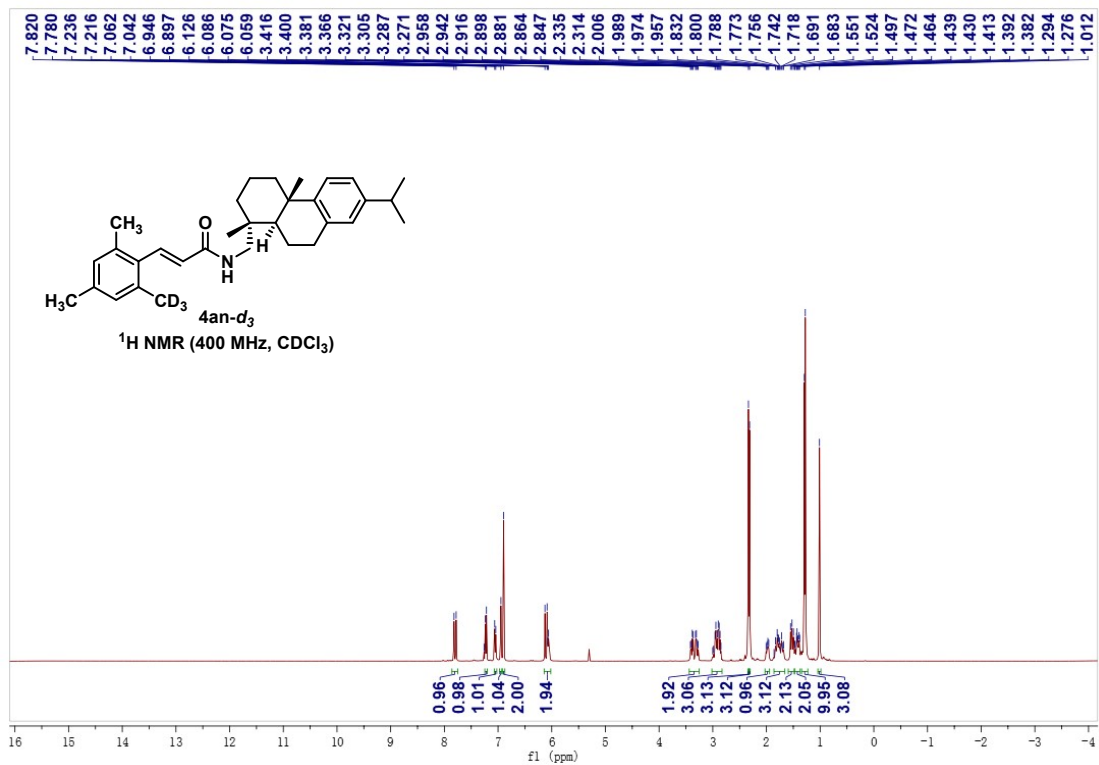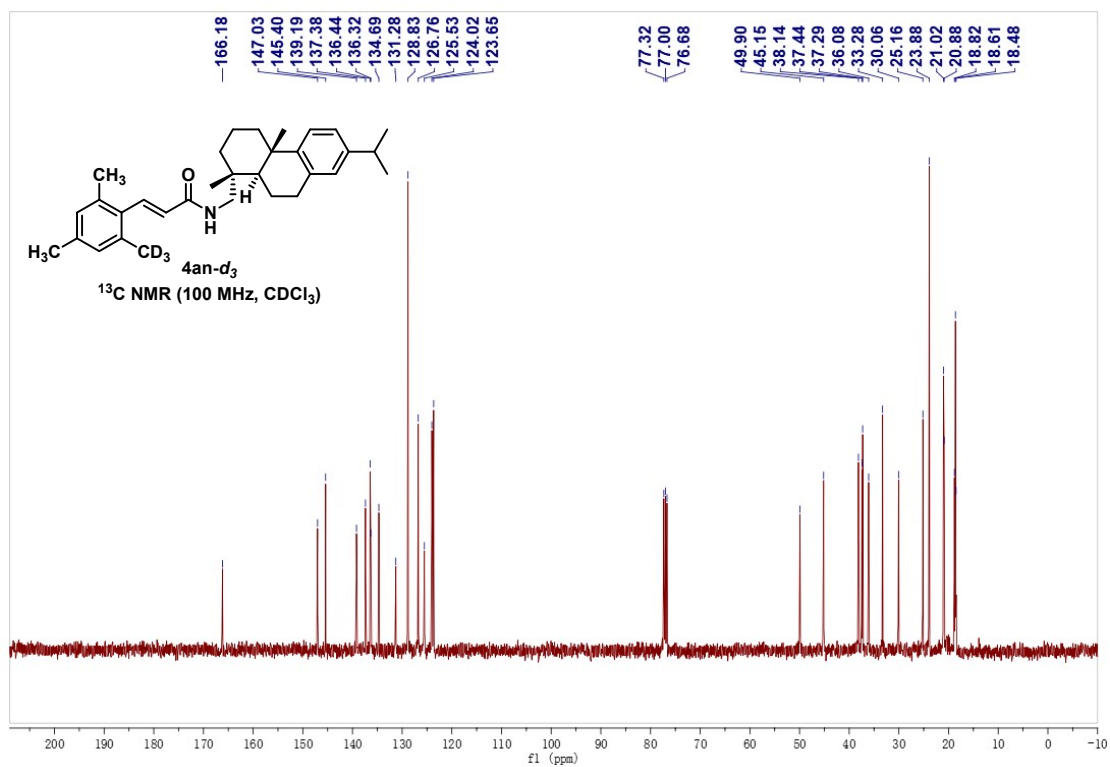

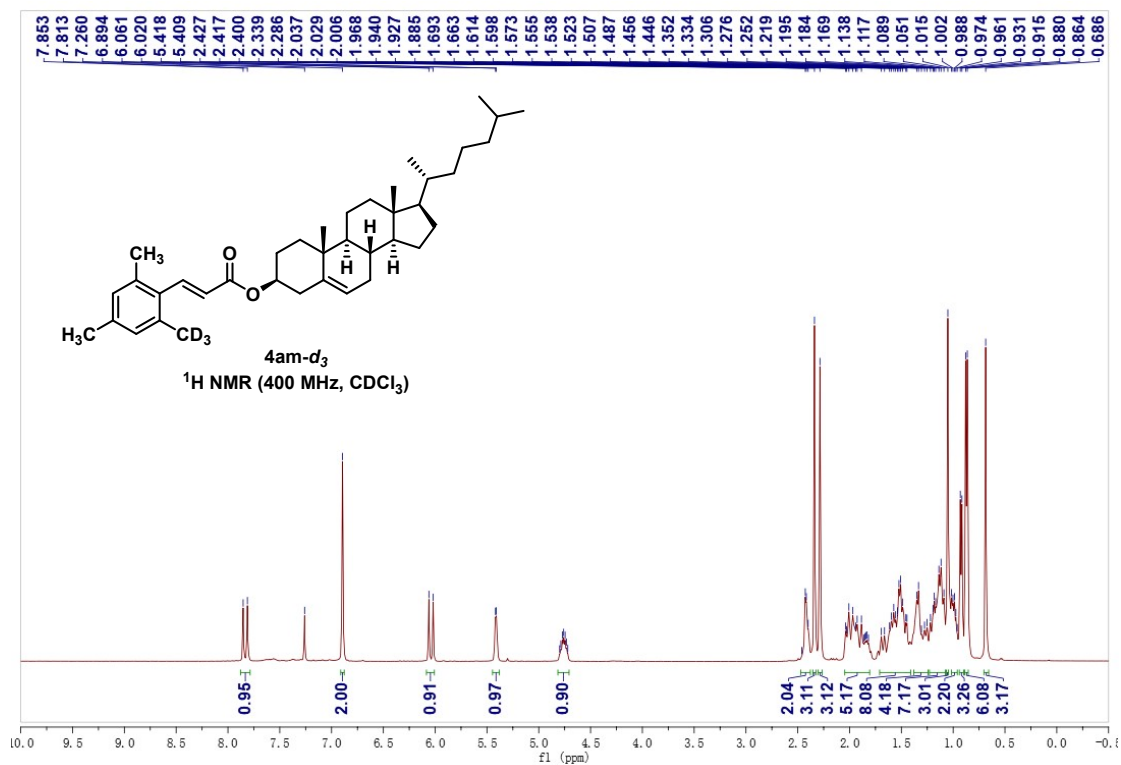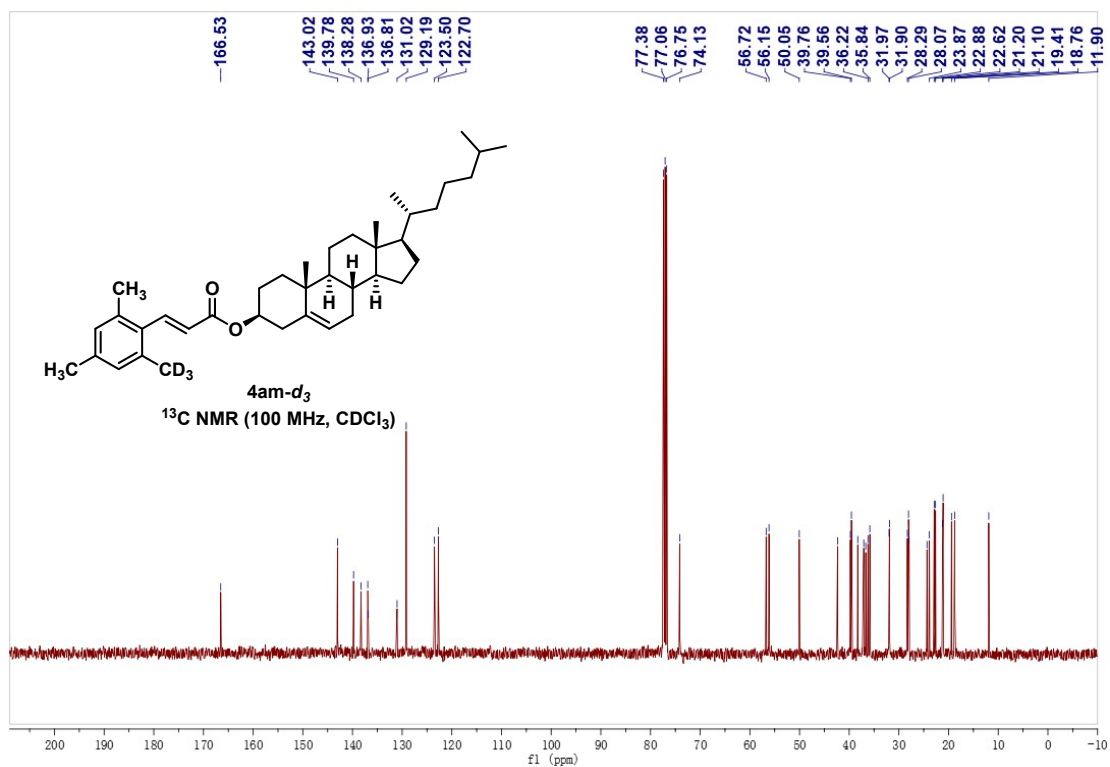



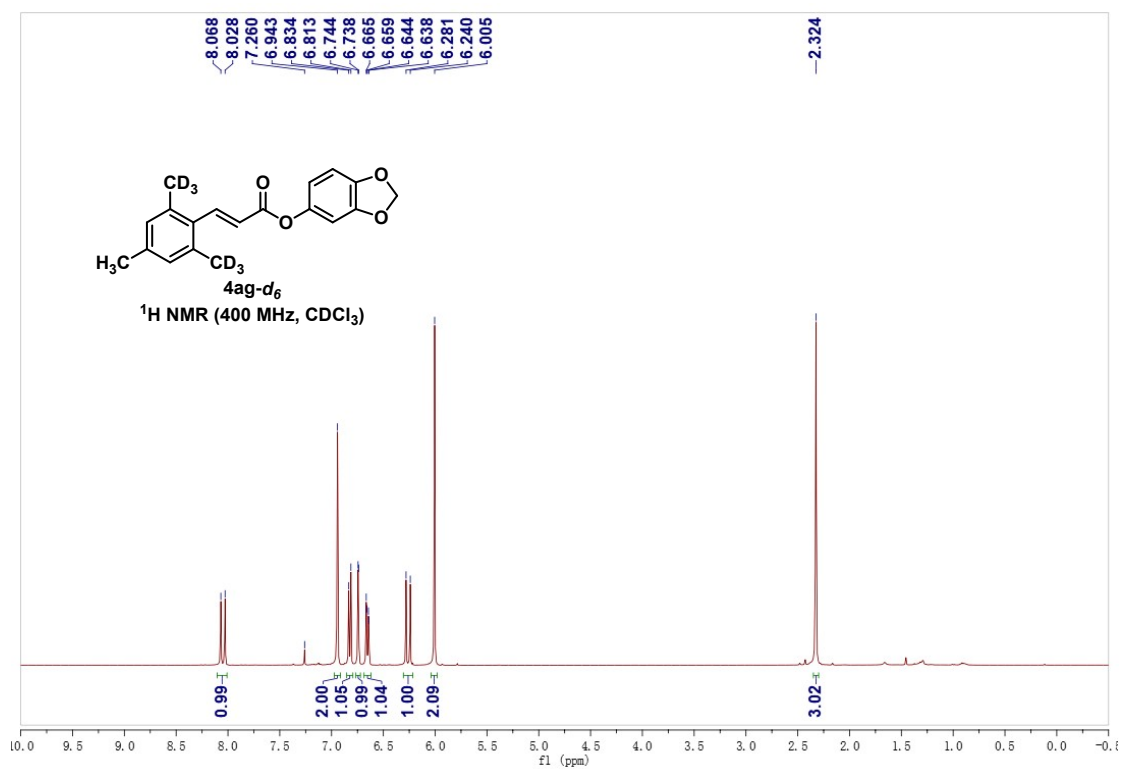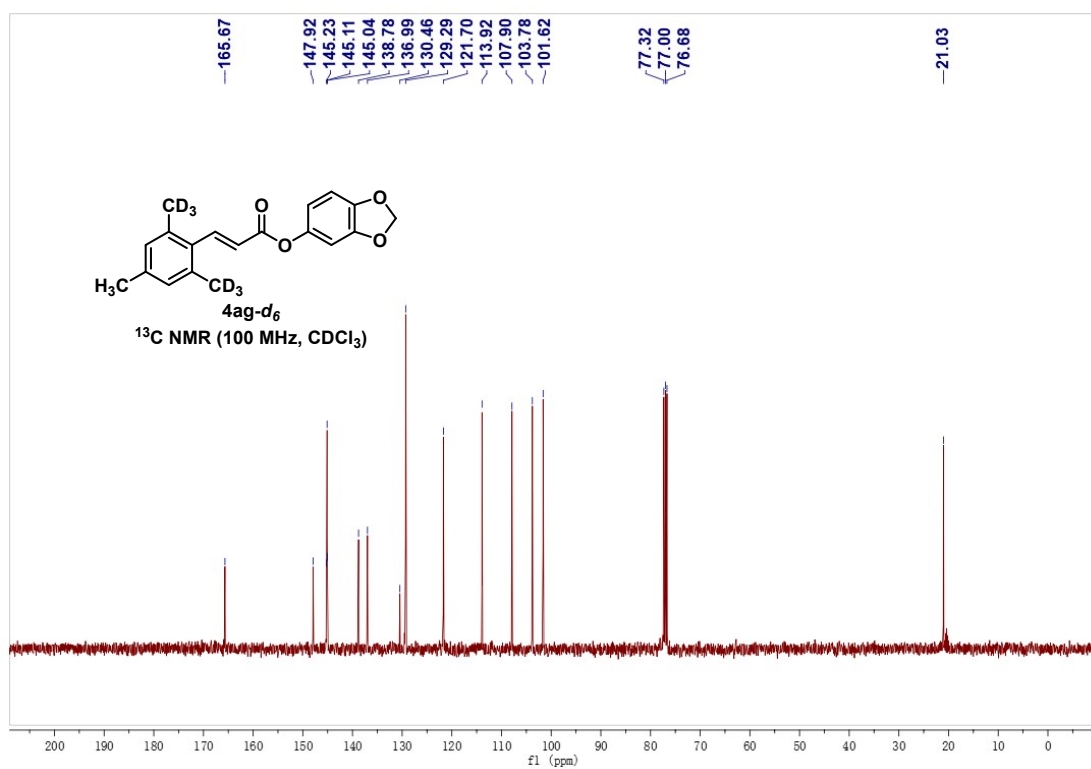

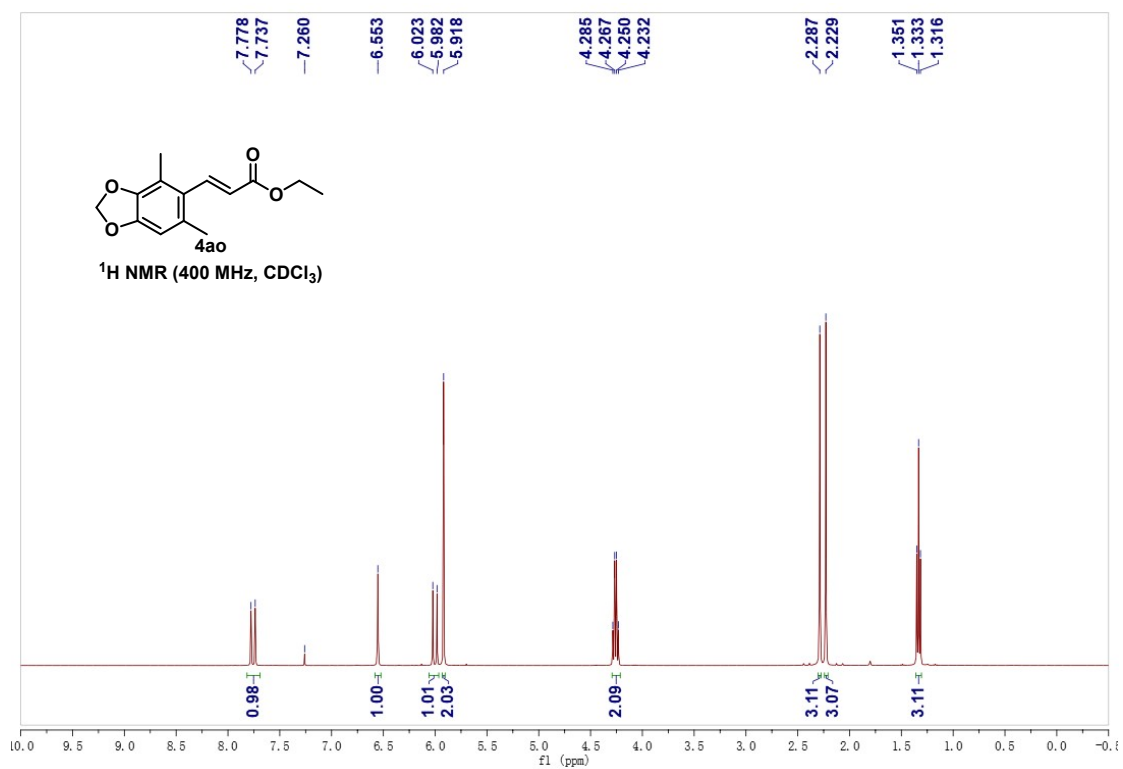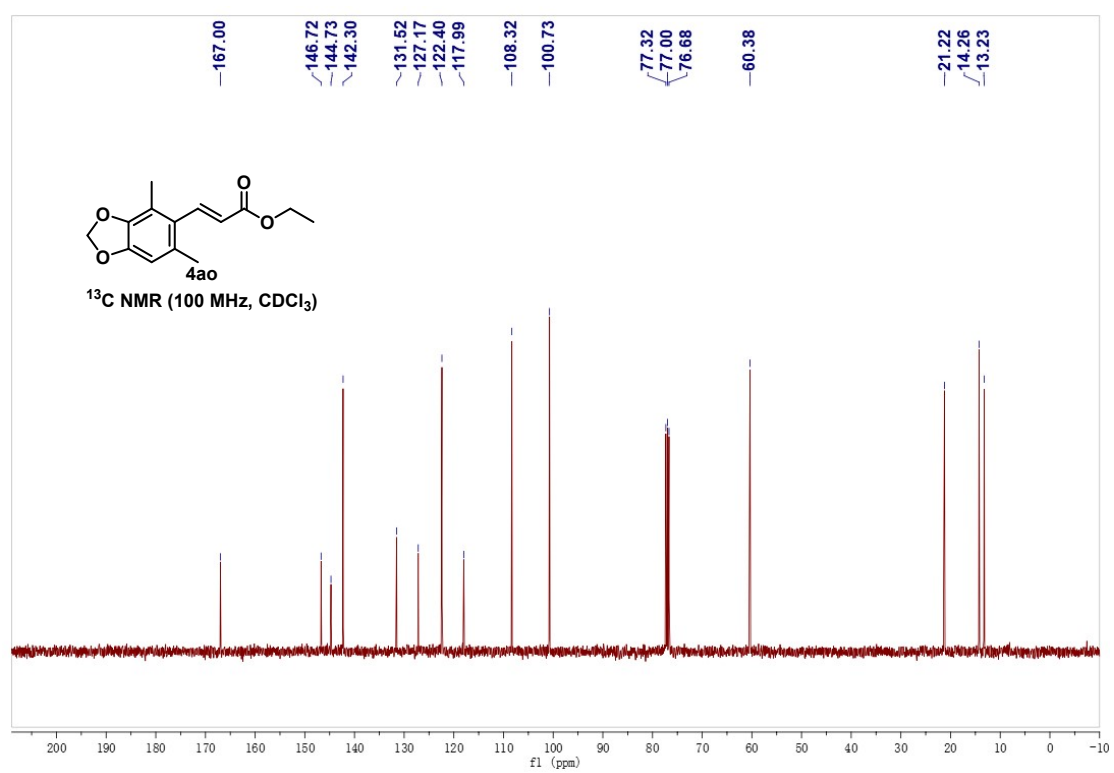

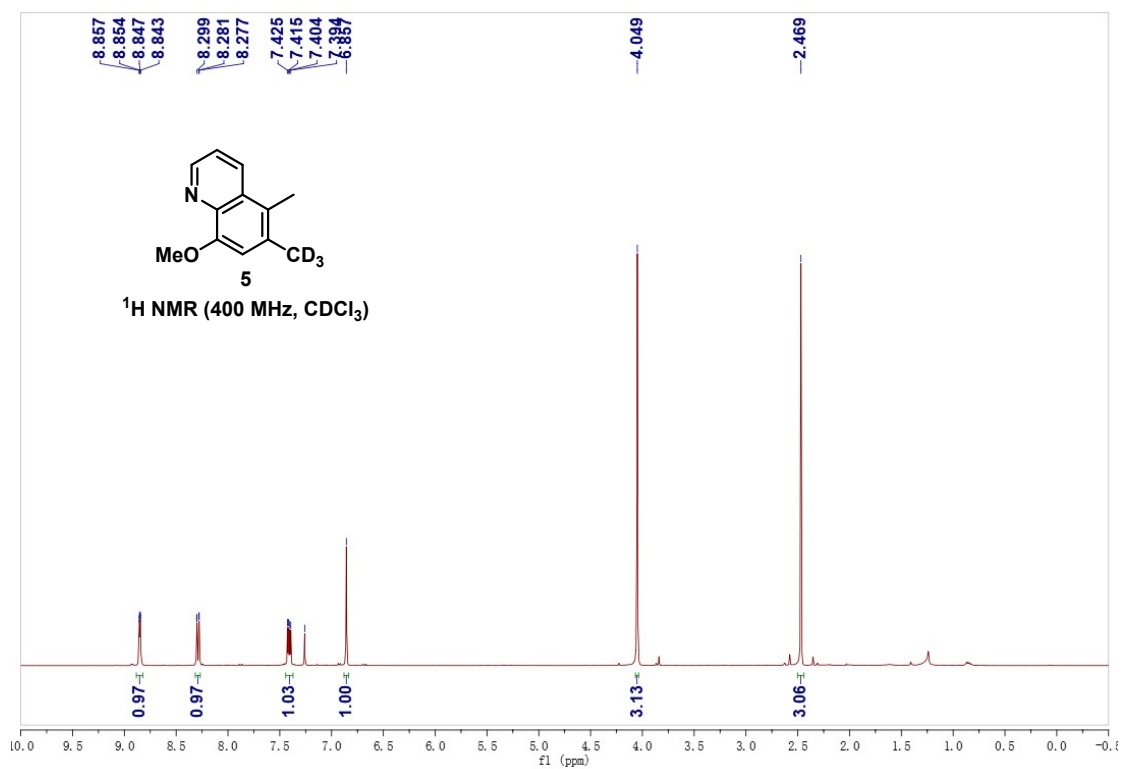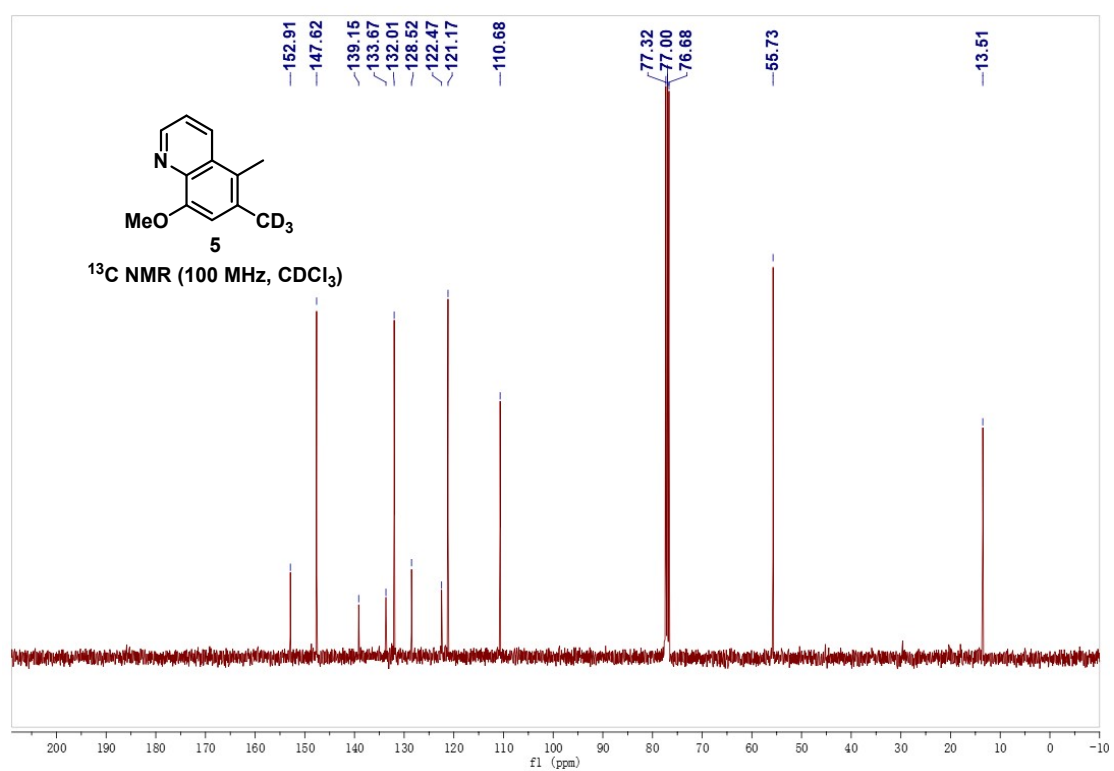

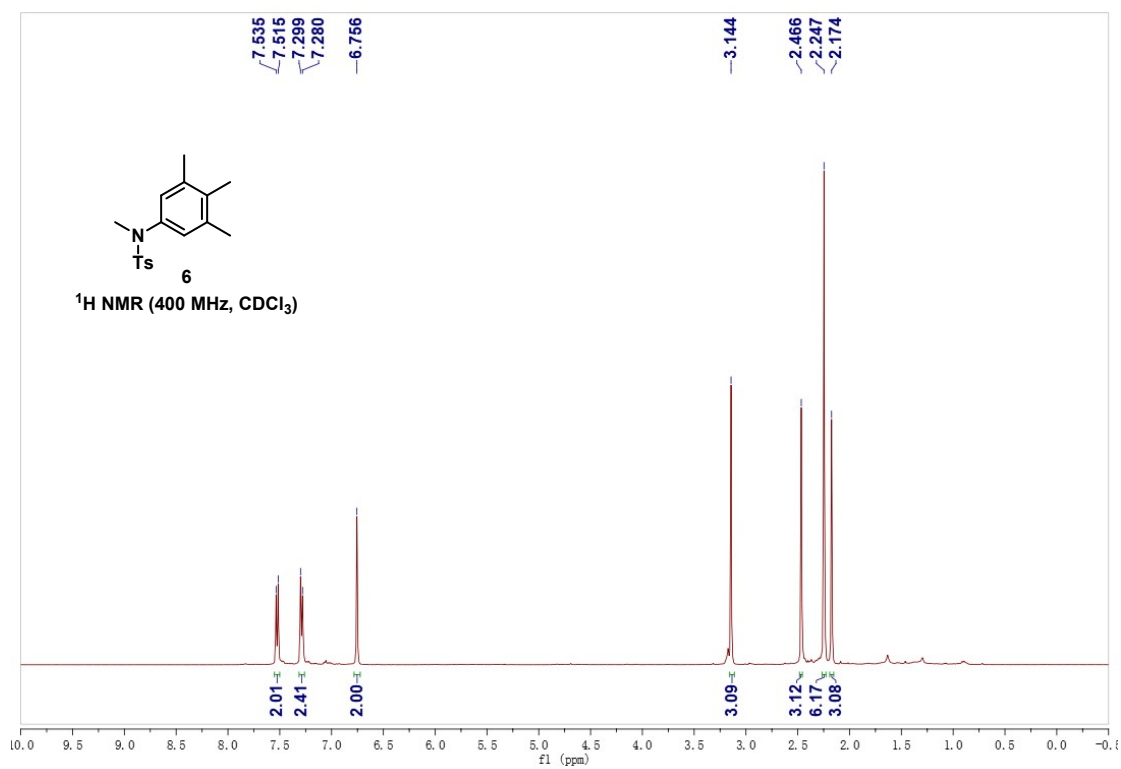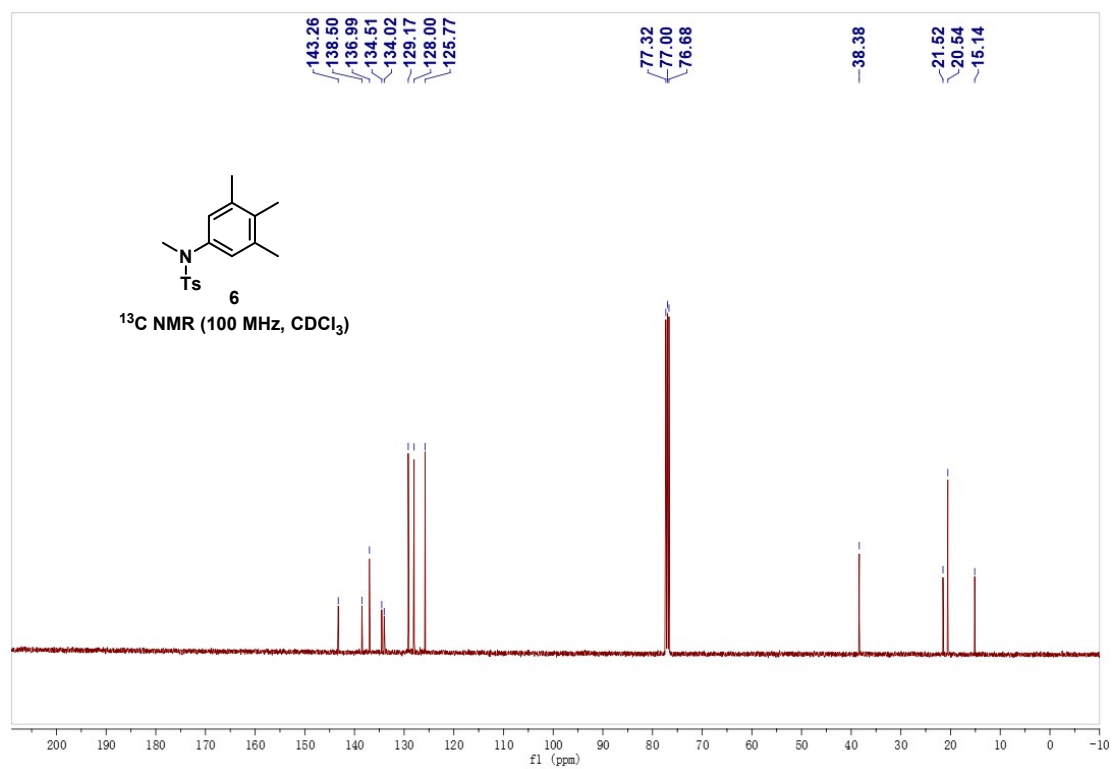

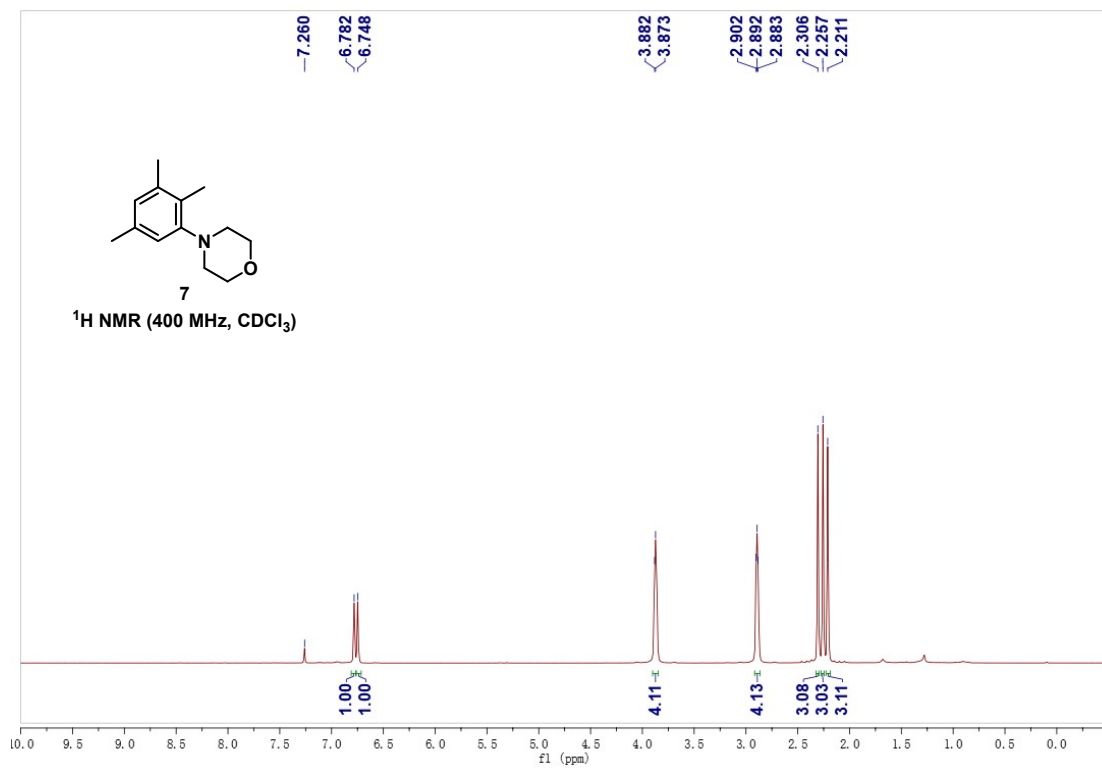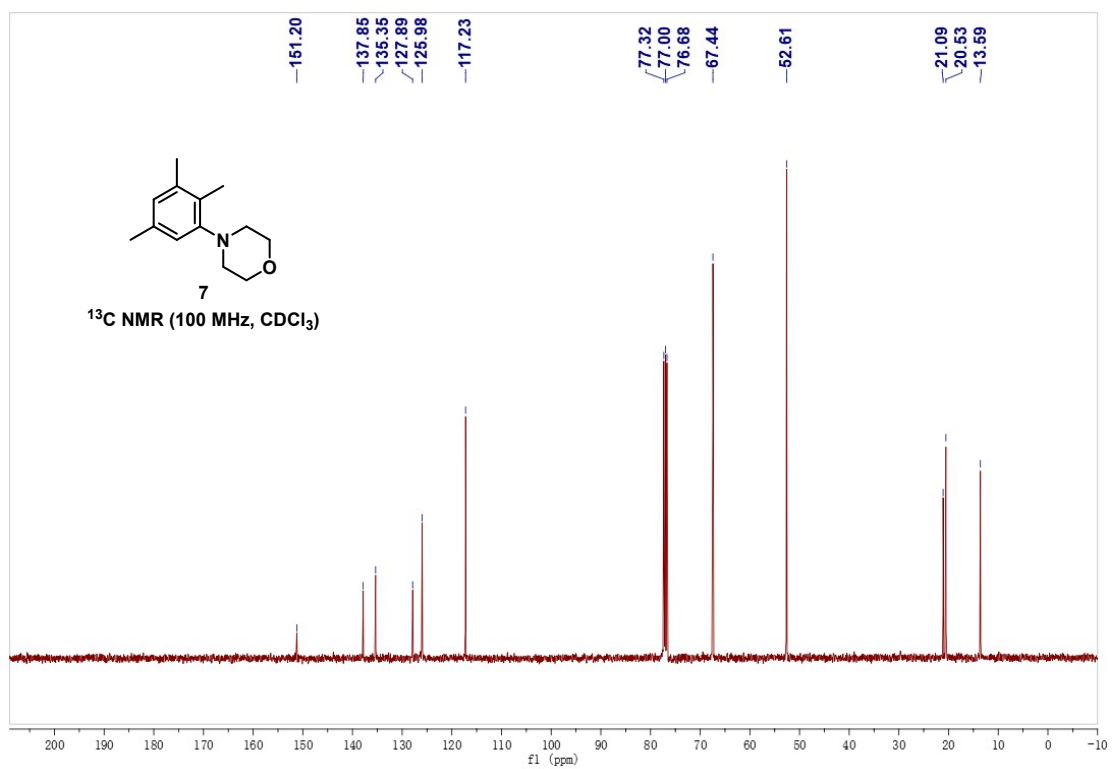

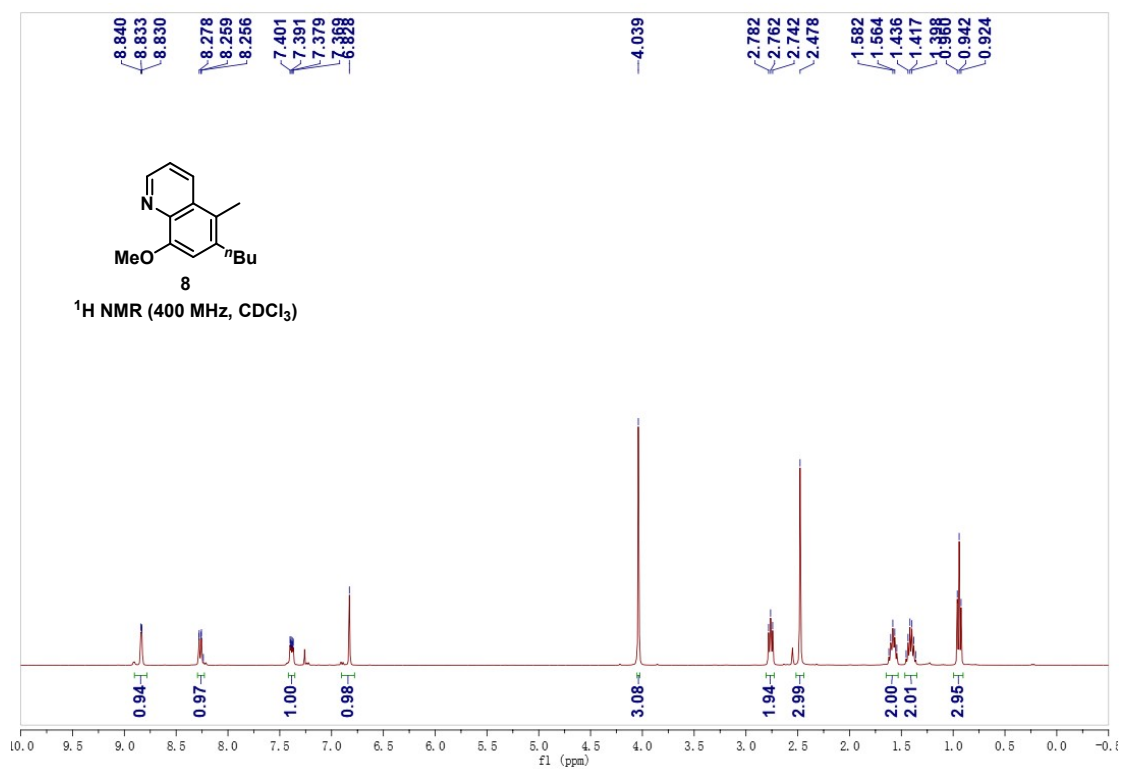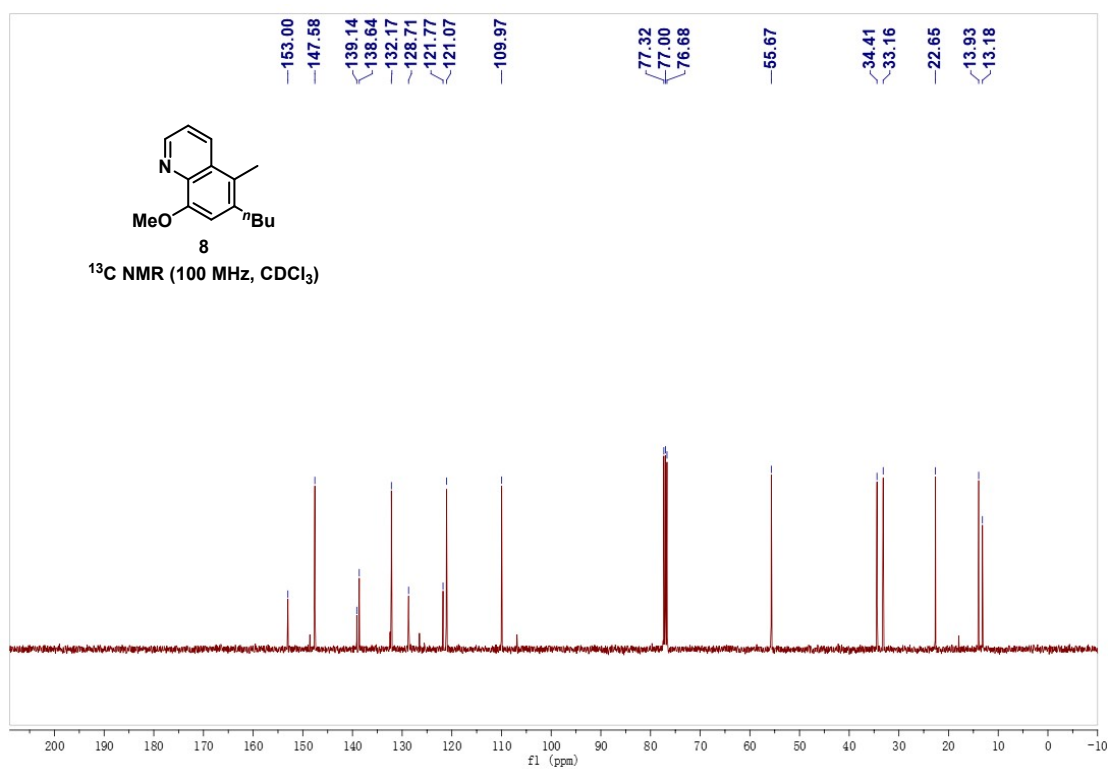

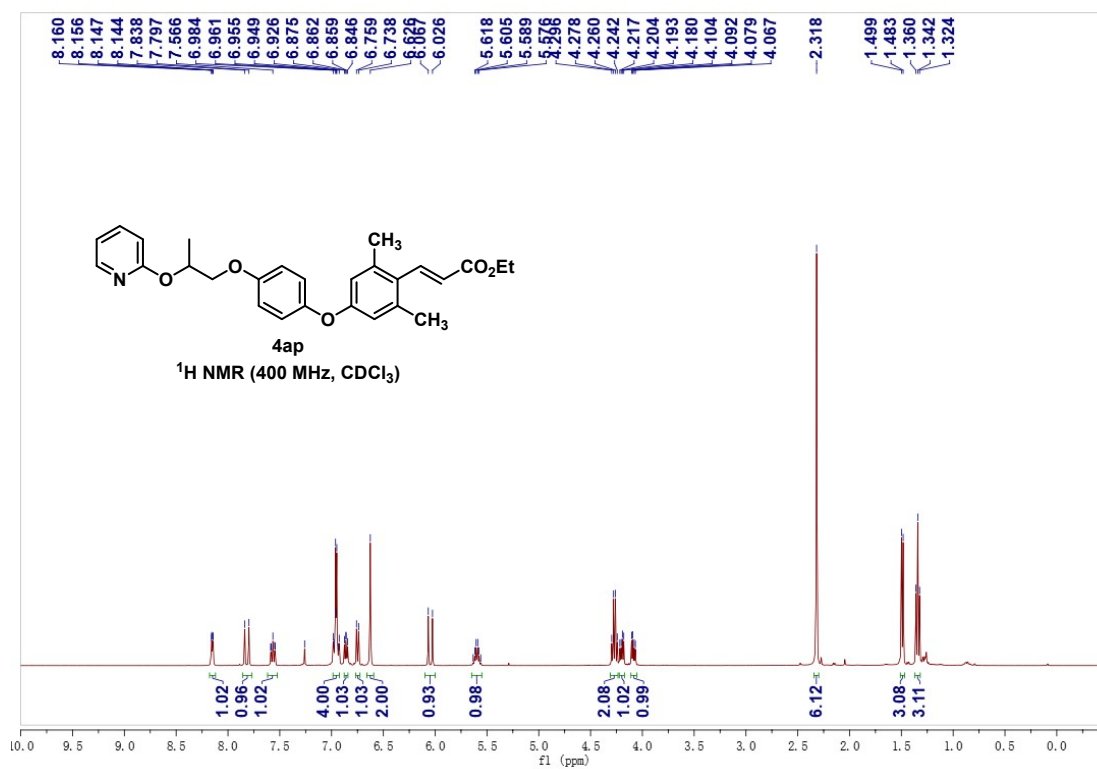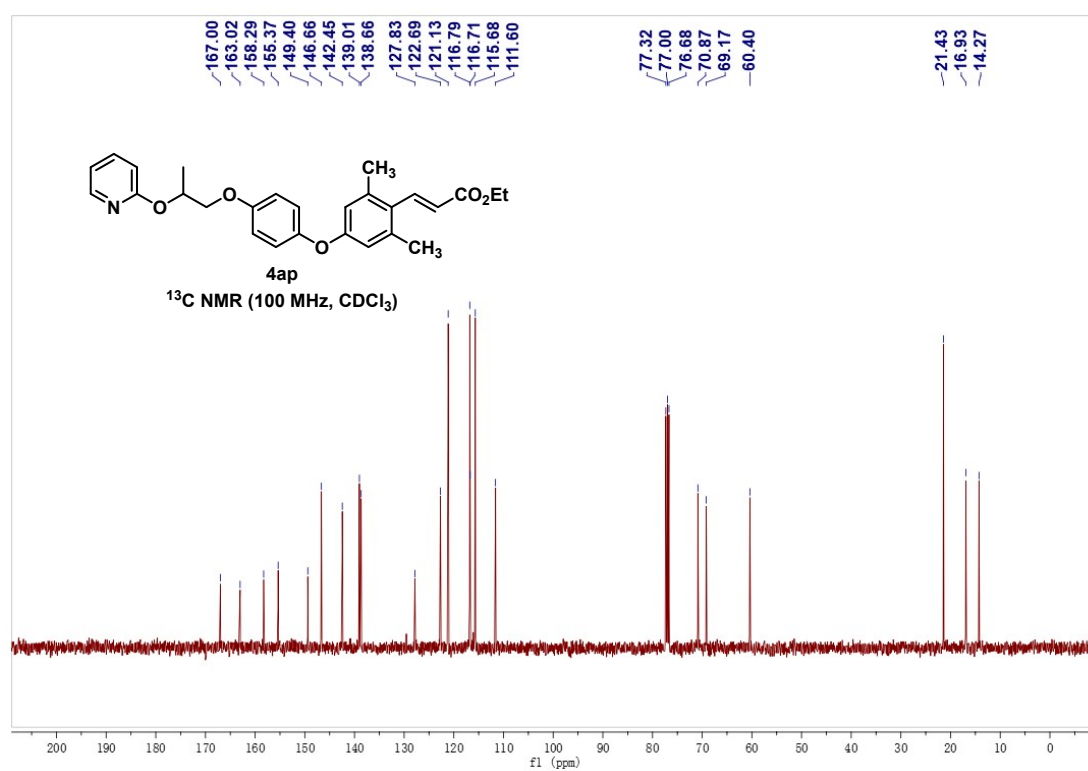

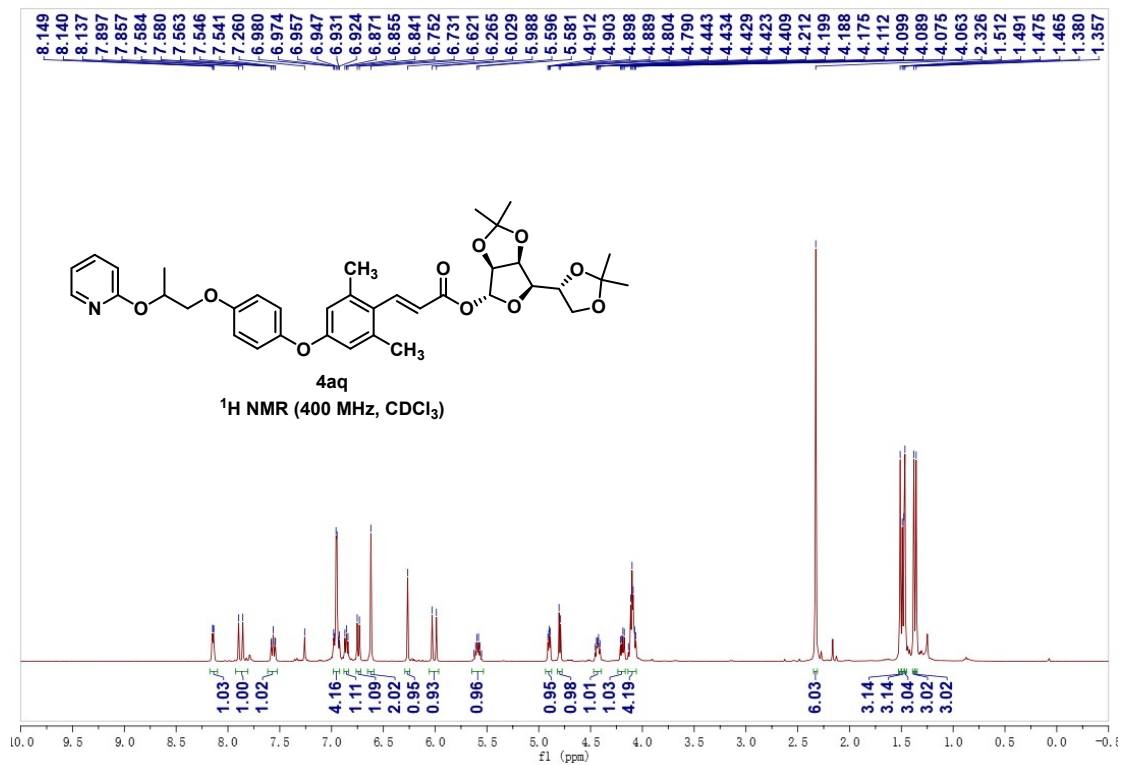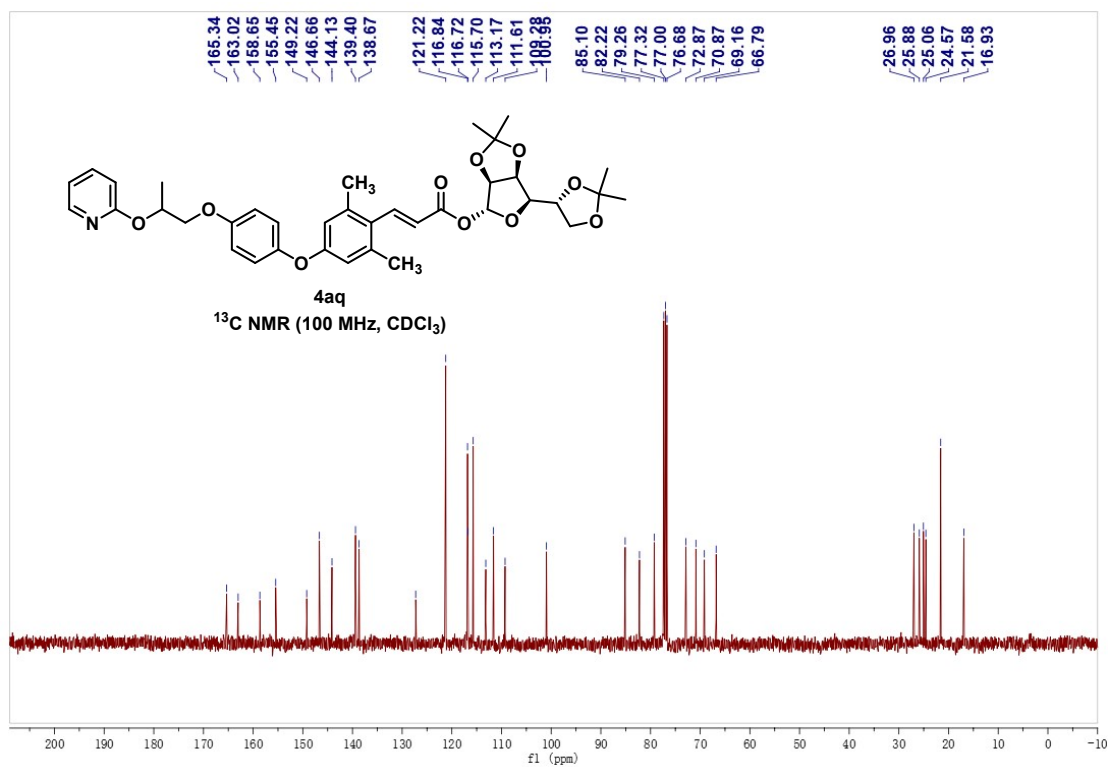



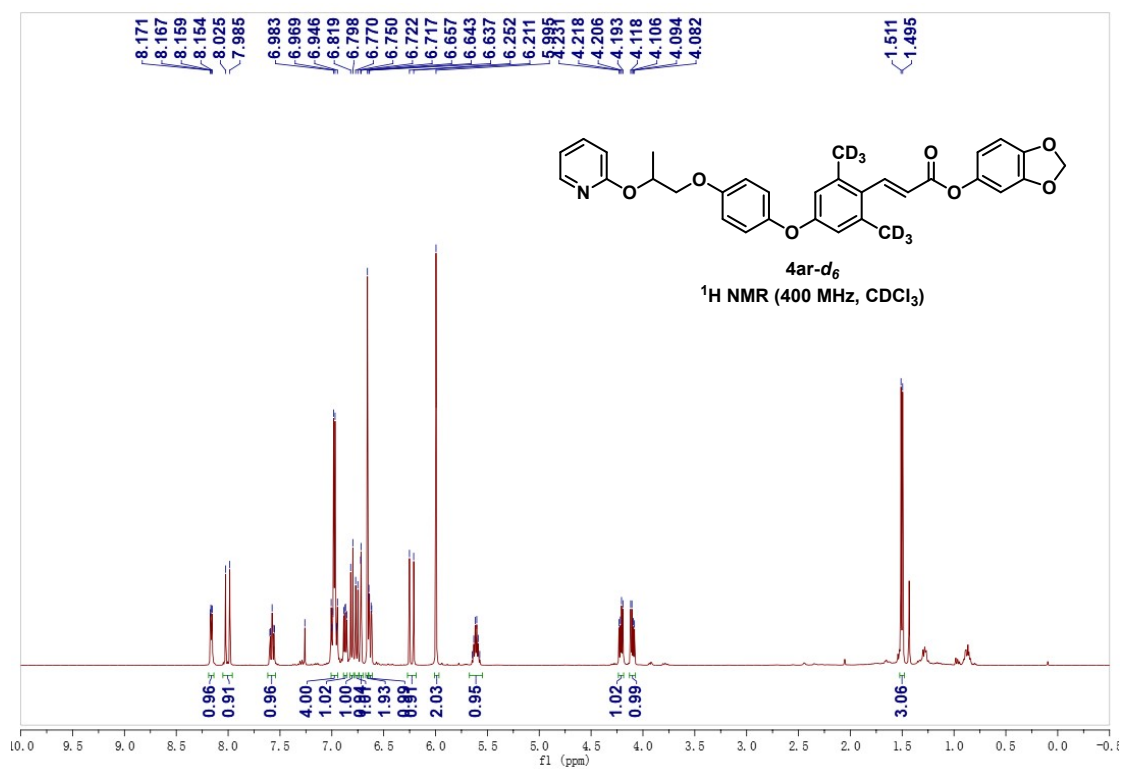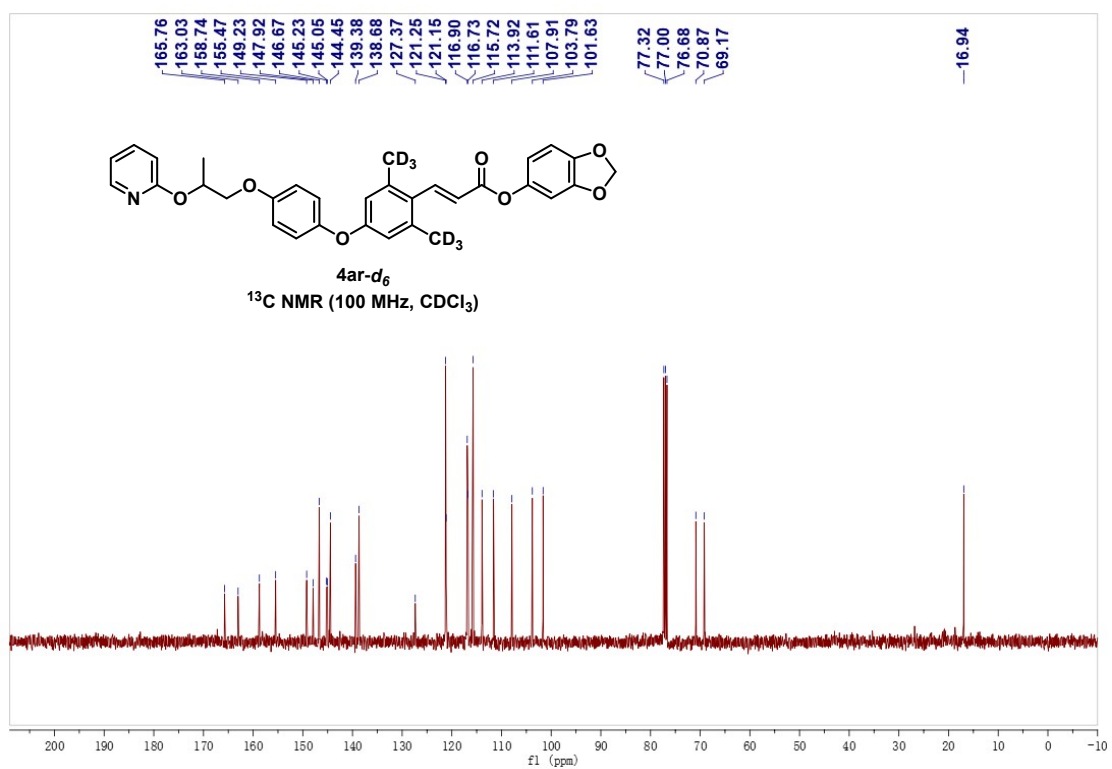

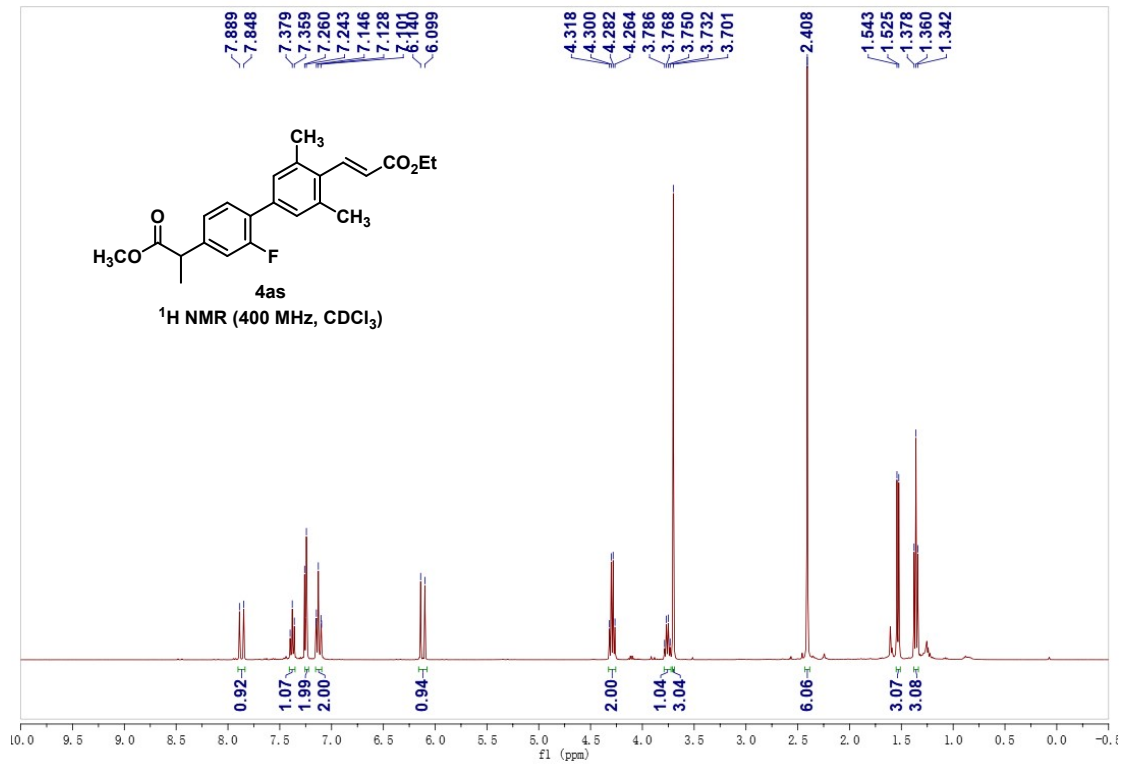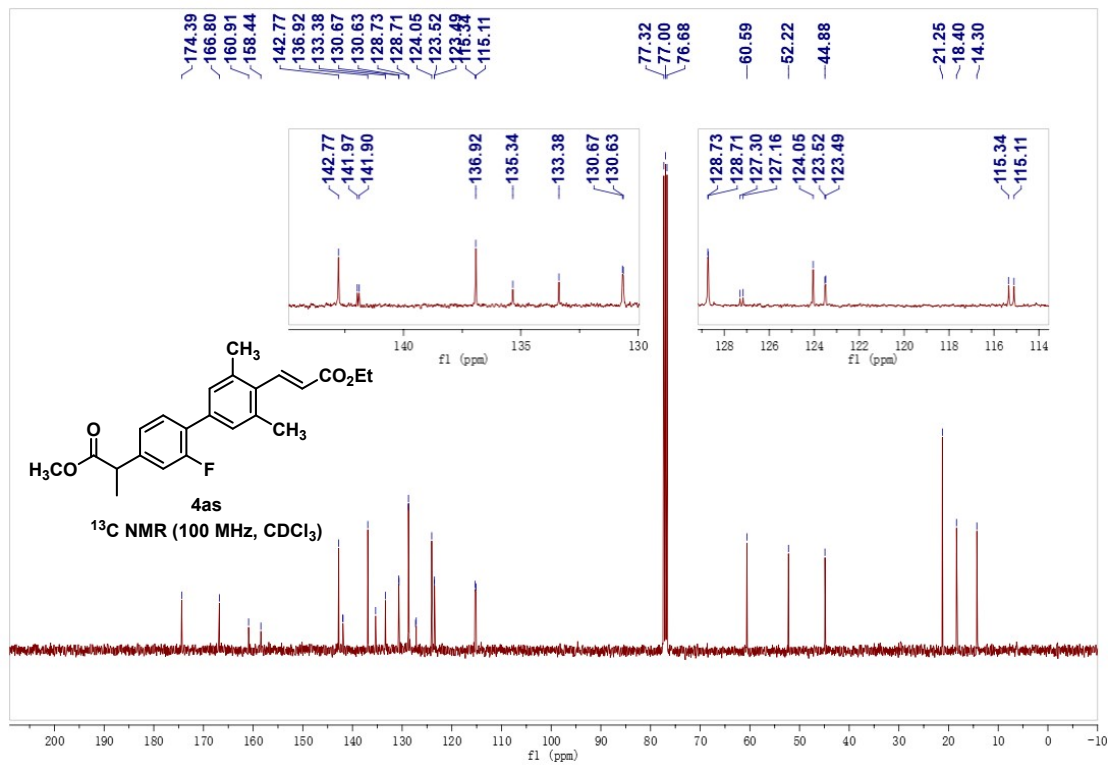

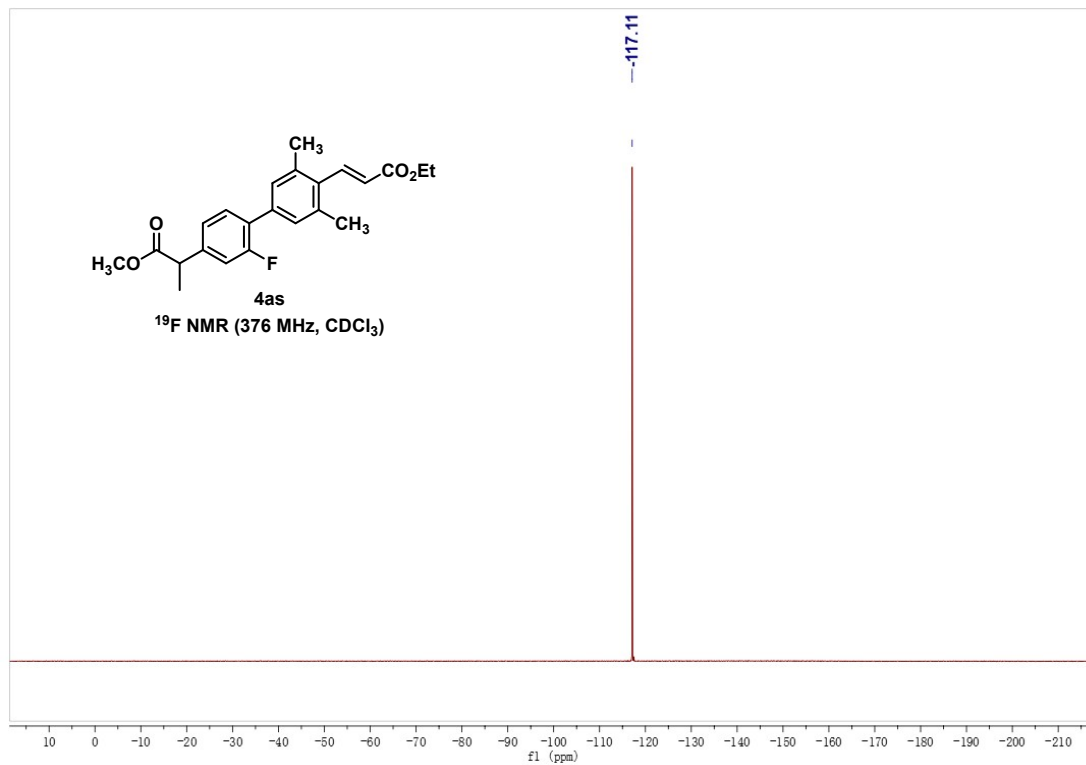

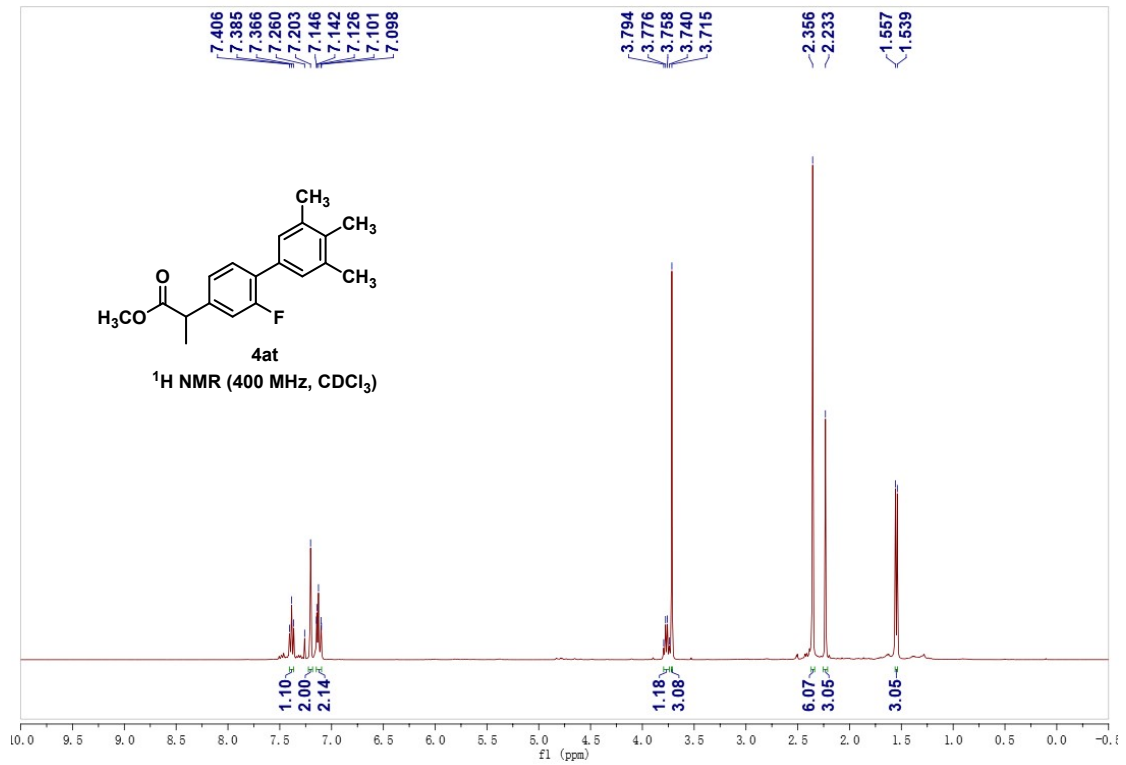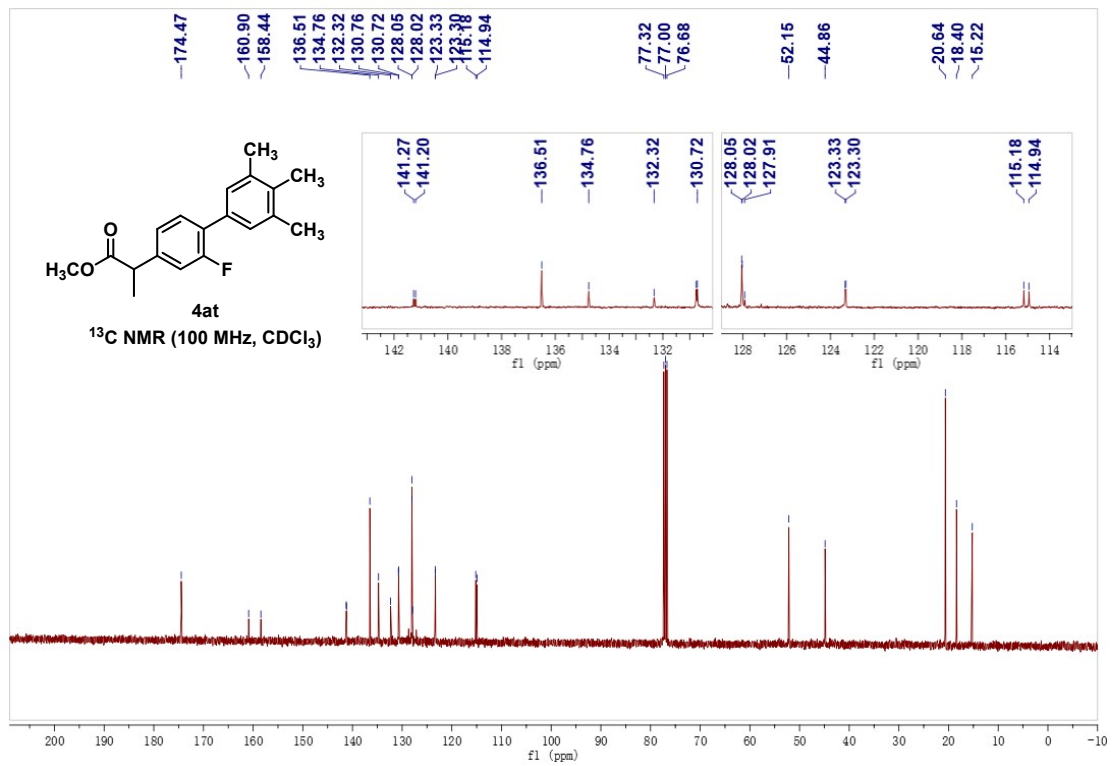

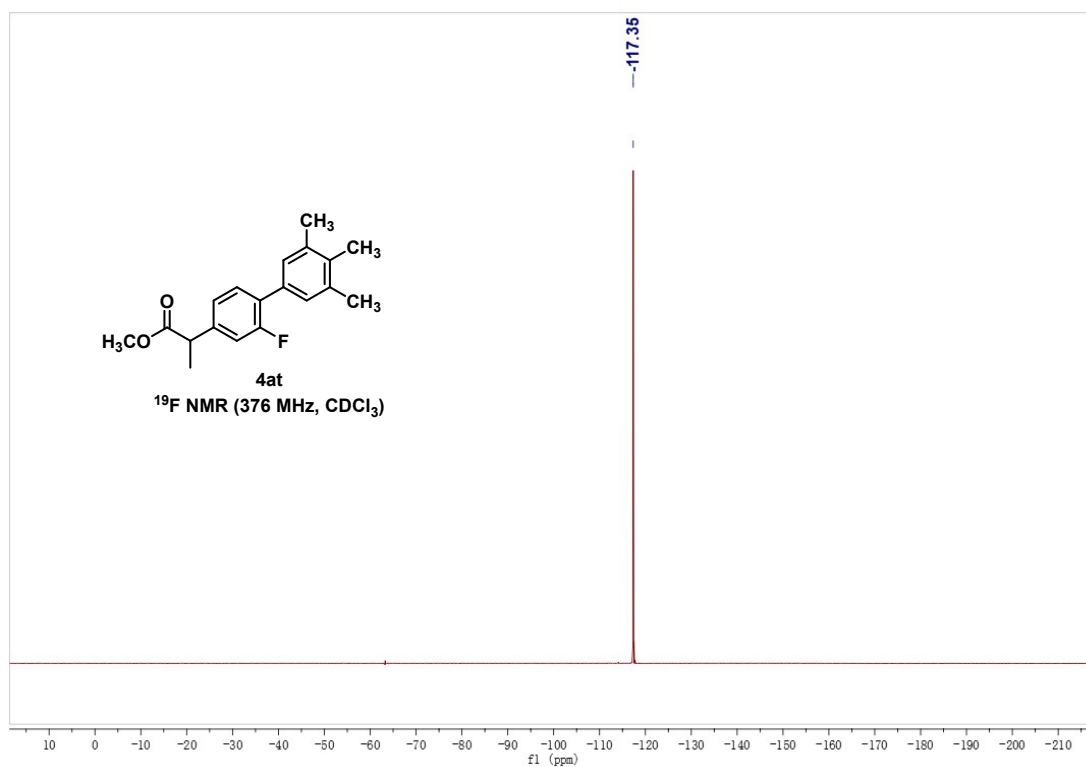

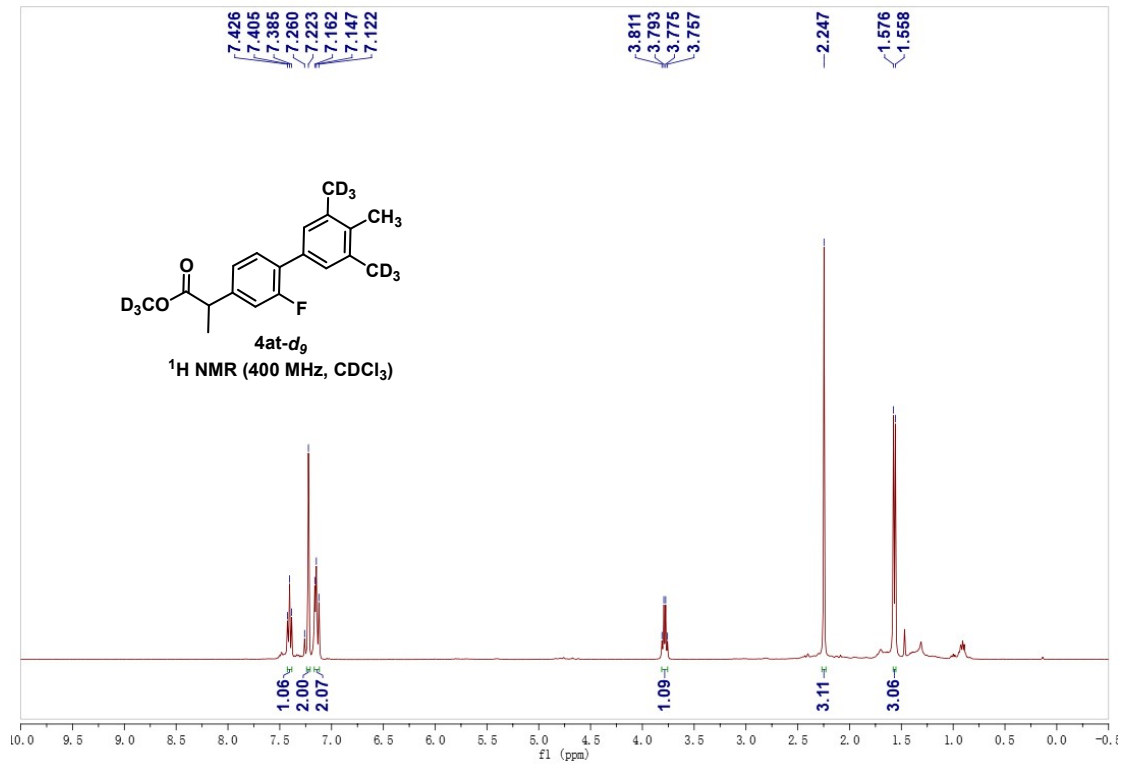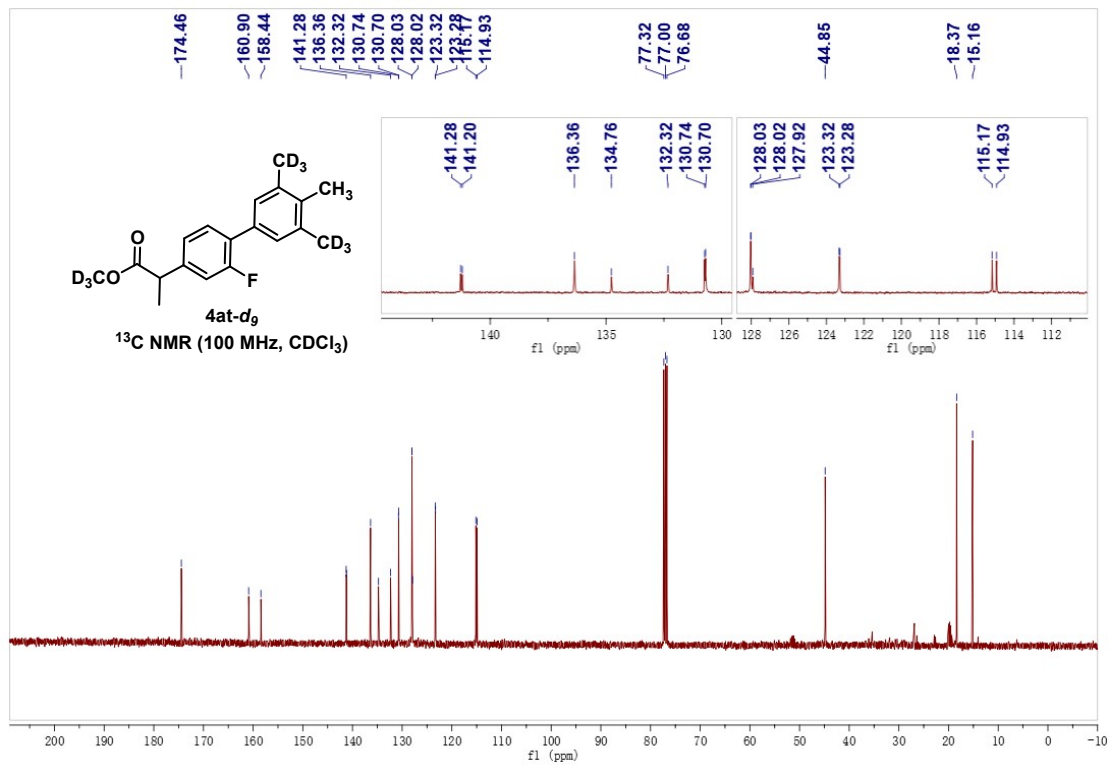

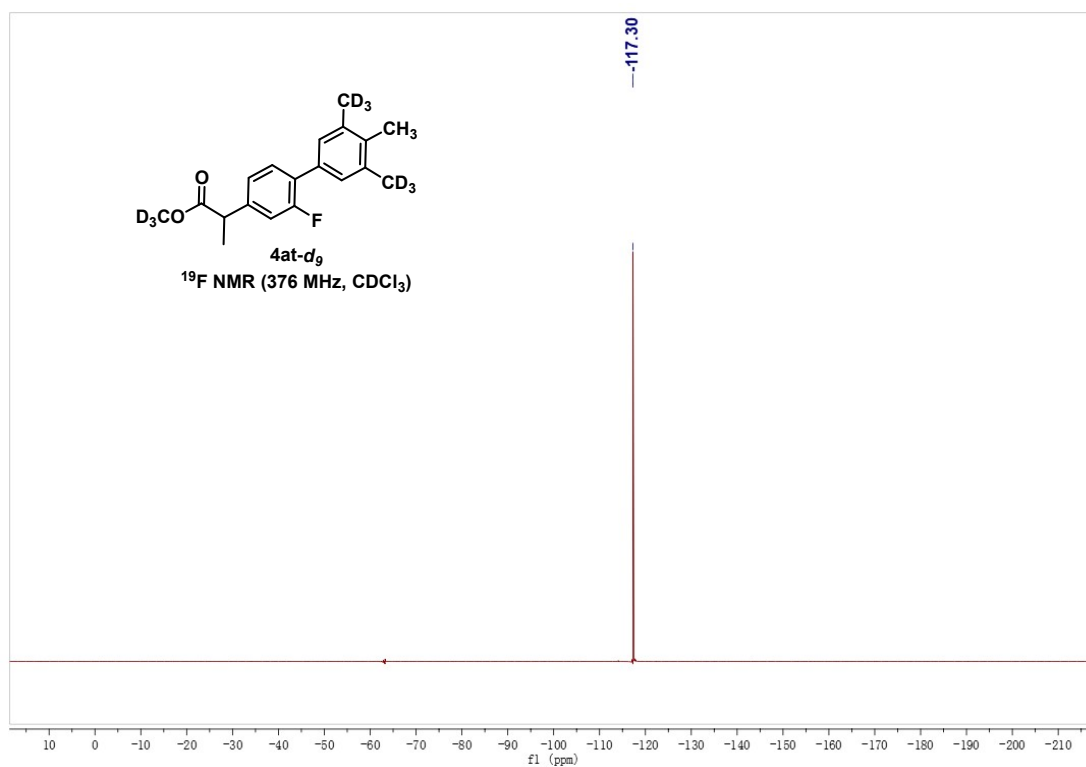

Supplement: d4qo00506f1.pdf [file d4qo00506f1.pdf]
